# Supplementary material for: NMR quality control of fragment libraries for screening
Source: J Biomol NMR. 2020 Jun 12;74(10):555–63. doi: 10.1007/s10858-020-00327-9 (PMC7683495; doi:10.1007/s10858-020-00327-9)
Supplement: Supplementary file 1 — Electronic supplementary material 1 (XLSX 285 kb) [file 10858_2020_327_MOESM1_ESM.xlsx]

## Sheet: default
NAME	SMILES	Molecular Weight	Cluster number	ClusterSize	SlogP	NumHBA	NumHBD	Topological Polar Surface Area	NumRotatableBonds	NumAromaticRings	ALERTS	Weighted QEDwmo	Mannhold LogP	Atomic Polarizabilities	Aromatic Atoms Count	Aromatic Bonds Count	Element Count	Bond Polarizabilities	Bond Count	Eccentric Connectivity Index	Fragment Complexity	VABC Volume Descriptor	Hydrogen Bond Acceptors	Hydrogen Bond Donors	Largest Chain	Largest Pi Chain	Petitjean Number	Rotatable Bonds Count	Lipinski's Rule of Five	Vertex adjacency information magnitude	XLogP	Zagreb Index	Molecular Formula	Heavy Atoms Count	SP3 Character	SMR	TPSA	NumLipinskiHBA	NumLipinskiHBD	NumAmideBonds	NumHeteroAtoms	NumHeavyAtoms	NumAtoms	NumStereocenters	NumUnspecifiedStereocenters	NumRings	NumSaturatedRings	NumAliphaticRings	NumAromaticHeterocycles
ZINC01452383	CCNC(=O)Nc1cc(on1)C	169.085	116	1	1.12442	3	2	67.16	2	1	0	0.864717	1.68	24.5587	5	5	23	16.2193	12	145	397.05	149.033	3	2	5	9	0.5	4	0	4.58496	0.622	54	C7H11N3O2	12	0.130435	43.9354	67.16	5	2	2	5	12	23	0	0	1	0	0	1
ZINC00412981	c1cc(ccc1NC(=O)C2CCC2)n3cnnn3	243.112	282	1	1.4009	5	1	72.7	3	2	0	0.844325	2.12	36.0903	11	11	31	17.8097	20	341	783.06	205.194	5	1	3	14	0.454545	3	0	5.32193	1.805	94	C12H13N5O	18	0.129032	65.1247	72.7	6	1	1	6	18	31	0	0	3	1	1	1
ZINC01452228	c1ccc(cc1)COc2ccc(cc2)C(=O)NN	242.106	138	8	1.8691	3	2	64.35	4	2	3	0.423936	2.56	37.7791	12	12	32	16.8589	19	345	783.04	225.306	3	2	4	11	0.5	5	0	5.24793	2.054	86	C14H14N2O2	18	0.03125	68.8696	64.35	4	3	1	4	18	32	0	0	2	0	0	0
ZINC00069044	CCC(=O)Nc1nc(cs1)C	170.051	106	3	1.80002	3	1	70.23	2	1	0	0.706012	1.79	24.8899	5	5	21	16.1501	11	117	331.04	147.755	3	1	4	8	0.428571	4	0	4.45943	0.651	50	C7H10N2OS	11	0.142857	45.7717	41.99	3	1	1	4	11	21	0	0	1	0	0	1
ZINC00403245	CNC(=O)c1ccc(cc1)S(=O)(=O)N	214.041	77	1	-0.3064	3	2	97.64	2	1	0	0.780199	1.68	28.2539	6	6	24	18.3661	14	168	394.06	179.995	5	2	4	13	0.5	4	0	4.80735	-0.114	68	C8H10N2O3S	14	0.0416667	51.2054	89.26	5	3	1	6	14	24	0	0	1	0	0	0
ZINC00433032	c1cnc(nc1)NC2CCCCCC2	191.142	247	2	2.6113	3	1	37.81	2	1	0	0.863118	2.34	33.9955	6	6	31	21.8845	15	190	842.03	188.28	3	1	0	7	0.5	2	0	4.90689	2.5	66	C11H17N3	14	0.225806	57.1447	37.81	3	1	0	3	14	31	0	0	2	1	1	1
ZINC01387965	c1cc(c(cc1n2cc(nn2)CO)Cl)Cl	242.997	166	2	2.0664	4	1	50.94	2	2	0	0.758543	1.79	28.9696	11	11	22	10.4724	16	214	319.06	176.728	3	1	2	11	0.444444	5	0	5	1.972	76	C9H7Cl2N3O	15	0.0454545	57.3018	50.94	4	1	0	6	15	22	0	0	2	0	0	1
ZINC00246884	CN(C)C(=O)Nc1ccc(cc1)S(=O)(=O)N	243.068	34	2	0.4275	3	2	100.88	2	1	0	0.665991	1.68	33.1143	6	6	29	23.6257	16	222	601.07	208.288	6	2	4	14	0.444444	5	0	5	-0.483	78	C9H13N3O3S	16	0.0689655	60.5209	92.5	6	3	2	7	16	29	0	0	1	0	0	0
ZINC00389924	c1cc(sc1)c2[nH]ccn2	150.025	351	2	2.1382	2	1	56.92	1	2	0	0.815481	1.9	21.4208	10	10	16	10.8192	11	90	199.03	113.072	1	1	0	10	0.4	1	0	4.45943	0.977	50	C7H6N2S	10	0	41.9007	28.68	2	1	0	3	10	16	0	0	2	0	0	2
ZINC00397376	COC(=O)Nc1ccc(cc1)Br	228.974	11	6	2.6274	2	1	38.33	1	1	0	0.751983	1.9	25.1683	6	6	20	13.5697	12	142	268.04	160.983	3	1	4	10	0.5	4	0	4.58496	2.245	54	C8H8BrNO2	12	0.05	50.1697	38.33	3	1	1	4	12	20	0	0	1	0	0	0
ZINC00500969	c1ccc2c(c1)ccc(n2)C(=O)NO	188.059	273	2	1.3538	3	2	62.22	1	2	2	0.578893	2.12	26.7383	10	11	22	10.3637	15	179	347.04	158.759	2	2	4	14	0.5	2	0	4.90689	1.181	70	C10H8N2O2	14	0	50.9957	62.22	4	2	1	4	14	22	0	0	2	0	0	1
ZINC00244880	CCOC(=O)C1CCN(CC1)c2cnccn2	235.132	363	1	1.2561	5	0	55.32	3	1	0	0.787937	2.23	37.3595	6	6	34	26.0785	18	294	953.05	220.52	5	0	5	7	0.454545	5	0	5.16993	1.235	82	C12H17N3O2	17	0.205882	63.602	55.32	5	0	0	5	17	34	0	0	2	1	1	1
ZINC00419911	c1ccc2c(c1)ncn2Cc3ccc(cc3)C#N	233.095	172	3	2.95628	3	0	41.61	2	3	0	0.530133	2.78	37.0347	15	16	29	15.9853	20	334	655.03	207.489	2	0	2	9	0.454545	2	0	5.32193	3.054	94	C15H11N3	18	0.0344828	69.992	41.61	3	0	0	3	18	29	0	0	3	0	0	1
ZINC01076074	COCc1nnc(s1)N	145.031	297	5	0.2667	5	1	89.27	2	1	0	0.641797	1.35	18.7096	5	5	16	12.5084	9	80	184.05	109.501	4	1	3	6	0.5	4	0	4.16993	0.197	40	C4H7N3OS	9	0.125	35.0344	61.03	4	2	0	5	9	16	0	0	1	0	0	1
ZINC00157663	c1cnc([nH]1)c2[nH]ccn2	134.059	351	2	0.7998	2	2	57.36	1	2	0	0.627759	1.68	18.9608	10	10	16	10.5192	11	90	199.04	99.2607	2	2	0	10	0.4	1	0	4.45943	-0.132	50	C6H6N4	10	0	36.1694	57.36	4	2	0	4	10	16	0	0	2	0	0	2
ZINC00074840	C[C@H]([C@H](c1ccccc1)O)[NH2+]C	166.123	244	1	0.3017	1	2	36.84	3	1	0	0.649583	2.34	30.1707	6	6	28	17.4913	12	127	652.02	171.456	1	2	5	6	0.428571	6	0	4.58496	1.5	54	C10H16NO	12	0.142857	48.7132	36.84	2	3	0	2	12	28	2	0	1	0	0	0
ZINC00394716	c1ccc2c(c1)[nH]c(n2)NC#N	158.059	49	5	1.45588	3	2	64.5	1	2	0	0.606695	1.9	22.4808	9	10	18	9.85924	13	139	229.04	128.58	3	2	3	12	0.428571	1	0	4.70044	1.251	60	C8H6N4	12	0	45.3294	64.5	4	2	0	4	12	18	0	0	2	0	0	1
ZINC01252167	C[NH+](C)CC#Cc1ccccc1	160.113	230	2	0.1826	0	1	4.44	1	1	1	0.66282	2.56	29.7951	6	6	26	16.6249	12	150	544.01	174.689	0	1	5	8	0.5	3	0	4.58496	2.274	52	C11H14N	12	0.115385	50.9977	4.44	1	1	0	1	12	26	0	0	1	0	0	0
ZINC00163959	Cc1ccc(o1)c2ccccc2N	173.084	111	3	2.83722	2	1	39.16	1	2	1	0.568556	2.45	28.5967	11	11	24	13.2813	14	150	469.02	158.904	1	1	0	12	0.428571	3	0	4.80735	2.081	66	C11H11NO	13	0.0416667	53.2934	39.16	2	2	0	2	13	24	0	0	2	0	0	1
ZINC00055860	c1c(c(=O)[nH]c(=O)[nH]1)N2CCOCC2	197.08	360	2	-1.1002	4	2	78.19	1	1	0	0.80563	1.68	27.1207	6	6	25	19.1573	15	179	494.06	173.663	2	2	0	9	0.5	1	0	4.90689	-0.25	70	C8H11N3O3	14	0.16	50.7154	78.19	6	2	0	6	14	25	0	0	2	1	1	1
ZINC00117248	c1cc(ccc1c2cncnc2N)Cl	205.041	269	1	2.3792	3	1	51.8	1	2	0	0.75832	2.12	28.4143	12	12	22	11.1457	15	181	347.04	167.386	3	1	0	13	0.5	3	0	4.90689	2.202	70	C10H8ClN3	14	0	56.8904	51.8	3	2	0	4	14	22	0	0	2	0	0	1
ZINC00187296	COc1ccc(c(c1)O)c2cc[nH]n2	190.074	157	3	1.7909	3	2	58.14	2	2	0	0.720827	2.12	28.0719	11	11	24	13.5081	15	178	443.04	161.395	1	2	2	13	0.5	4	0	4.90689	2.159	70	C10H10N2O2	14	0.0416667	52.2405	58.14	4	2	0	4	14	24	0	0	2	0	0	1
ZINC00188736	c1cc(ccc1c2ccc(o2)CO)N	189.079	111	3	2.0211	3	2	59.39	2	2	1	0.685533	2.34	29.3987	11	11	25	13.2813	15	199	494.03	167.694	2	2	2	12	0.444444	4	0	4.90689	1.044	70	C11H11NO2	14	0.04	54.4792	59.39	3	3	0	3	14	25	0	0	2	0	0	1
ZINC00508149	Cc1ccc(cc1)c2cc(on2)C#N	184.064	117	5	2.5217	3	0	49.82	1	2	0	0.809865	2.34	27.6963	11	11	22	11.3217	15	199	347.03	164.628	1	0	2	13	0.444444	2	0	4.90689	2.775	70	C11H8N2O	14	0.0454545	51.391	49.82	3	0	0	3	14	22	0	0	2	0	0	1
ZINC00576510	C[C@@H](C[NH2+]Cc1c(cccc1Cl)Cl)O	234.045	242	1	1.4376	1	2	36.84	4	1	0	0.690729	2.12	33.1971	6	6	28	16.1449	14	176	602.04	201.878	1	2	5	6	0.5	8	0	4.80735	2.641	64	C10H14Cl2NO	14	0.142857	58.6392	36.84	2	3	0	4	14	28	1	0	1	0	0	0
ZINC01426601	CNC(=O)c1nc(no1)c2cccs2	209.026	332	1	1.1577	5	1	96.26	2	2	0	0.746796	1.68	26.5516	10	10	21	14.7864	15	183	302.06	156.309	3	1	4	13	0.5	3	0	4.90689	0.631	70	C8H7N3O2S	14	0.047619	51.0012	68.02	5	1	1	6	14	21	0	0	2	0	0	2
ZINC00190426	Cc1ccc2c(c1)c3c([nH]2)[C@H](CCC3)[NH3+]	201.139	75	3	2.09562	0	2	43.43	0	2	0	0.655865	2.67	36.4155	9	10	32	17.9245	17	179	946.02	187.301	0	2	0	9	0.428571	2	0	5.08746	3.174	84	C13H17N2	15	0.15625	61.6028	43.43	2	4	0	2	15	32	1	0	3	0	1	1
ZINC00191034	c1ccc(cc1)C[NH+]2CC(=O)NC(=O)C2	205.098	209	2	-1.2721	2	2	50.61	2	1	0	0.784246	2.23	31.8323	6	6	28	18.1077	16	204	631.04	190.909	3	2	0	6	0.5	2	0	5	0.118	74	C11H13N2O2	15	0.107143	53.9924	50.61	4	2	2	4	15	28	0	0	2	1	1	0
ZINC00449195	CCOc1cccc(c1)c2nnc(s2)N	221.062	69	2	2.186	5	1	89.27	3	2	0	0.756466	2.01	31.9367	11	11	26	16.8813	16	215	519.05	182.111	3	1	3	13	0.444444	5	0	5	2.767	74	C10H11N3OS	15	0.0769231	60.9264	61.03	4	2	0	5	15	26	0	0	2	0	0	1
ZINC01240297	c1ccc(cc1)C#CC[NH+]2CCCCC2	200.144	230	2	1.1069	0	1	4.44	1	1	1	0.740207	2.89	37.7423	6	6	33	20.9977	16	252	946.01	214.22	0	1	3	8	0.5	1	0	5	3.138	70	C14H18N	15	0.181818	62.7347	4.44	1	1	0	1	15	33	0	0	2	1	1	0
ZINC00050238	c1cc(cc(c1)Cl)NC(=O)C[NH+]2CCCC2	239.095	216	6	0.9572	1	2	33.54	3	1	0	0.718078	2.34	36.9707	6	6	32	20.8493	17	245	849.04	217.263	2	2	3	9	0.444444	4	0	5.08746	1.77	78	C12H16ClN2O	16	0.15625	64.8794	33.54	3	2	1	4	16	32	0	0	2	1	1	0
ZINC00058195	CC(=O)Nc1ccc(cc1)c2csc(n2)N	233.062	107	5	2.3507	4	2	96.25	2	2	0	0.635184	2.12	33.6967	11	11	27	16.5833	17	254	544.05	196.77	4	2	3	15	0.5	4	0	5.08746	1.295	80	C11H11N3OS	16	0.037037	66.2661	68.01	4	3	1	5	16	27	0	0	2	0	0	1
ZINC00122543	CN(C)C(=O)N1CCN(CC1)C(=O)N(C)C	228.159	326	1	-0.0328	2	0	47.1	0	0	0	0.744591	1.9	36.9399	0	0	36	31.7001	16	218	1056.06	225.454	6	0	4	4	0.444444	4	0	5	-1.152	76	C10H20N4O2	16	0.222222	61.312	47.1	6	0	4	6	16	36	0	0	1	1	1	0
ZINC00178921	Cc1ccc2c(c1)c3c([nH]2)[C@@H](CCC3)C#N	210.116	75	3	3.4198	1	1	39.58	0	2	0	0.848346	2.78	36.1751	9	10	30	16.6249	18	210	784.02	198.006	1	1	2	9	0.5	1	0	5.16993	2.955	88	C14H14N2	16	0.166667	64.3277	39.58	2	1	0	2	16	30	1	0	3	0	1	1
ZINC00329883	c1cc(ccc1NC(=O)Nn2cnnc2)Cl	237.042	162	3	1.7071	4	2	71.84	2	2	0	0.846298	1.68	29.6563	11	11	24	13.4237	17	264	385.07	180.874	5	2	3	15	0.5	3	0	5.08746	2.116	78	C9H8ClN5O	16	0	59.8534	71.84	6	2	2	7	16	24	0	0	2	0	0	1
ZINC00386318	CCCn1c(nnn1)NC(=O)c2cccs2	237.068	347	2	1.3969	6	1	100.94	4	2	0	0.752641	1.68	32.3767	10	10	27	17.9033	17	236	544.07	186.808	5	1	3	13	0.444444	5	0	5.08746	1.516	78	C9H11N5OS	16	0.111111	60.3802	72.7	6	1	1	7	16	27	0	0	2	0	0	2
ZINC00507521	c1cc(ccc1Nc2c[nH]c(=O)[nH]c2=O)Cl	237.031	10	9	1.4602	3	3	77.75	2	2	0	0.795934	1.9	30.0183	12	12	24	13.0617	17	255	385.06	195.866	1	3	0	15	0.5	3	0	5.08746	2.084	80	C10H8ClN3O2	16	0	62.4181	77.75	5	3	0	6	16	24	0	0	2	0	0	1
ZINC01555639	Cc1ccc(cc1)S(=O)(=O)N(C)CCC#N	238.078	195	2	1.5292	3	0	69.55	4	1	0	0.823345	2.12	35.3991	6	6	30	24.4209	16	230	660.05	220.457	4	0	7	10	0.5	6	0	5	1.198	76	C11H14N2O2S	16	0.133333	61.2248	61.17	4	0	0	5	16	30	0	0	1	0	0	0
ZINC00065818	CN(C)c1c(nc(o1)c2ccc(cc2)Cl)C#N	247.051	2	2	2.93268	4	0	53.06	2	2	0	0.842784	2.23	34.0699	11	11	27	17.2281	18	248	512.05	208.132	3	0	3	14	0.444444	5	0	5.16993	3.175	86	C12H10ClN3O	17	0.0740741	65.991	53.06	4	0	0	5	17	27	0	0	2	0	0	1
ZINC00127654	c1cc(ccc1C(=O)[O-])Oc2ccc(cc2)N	228.066	60	2	1.4246	4	1	75.38	3	2	1	0.734352	2.45	33.0539	12	12	27	14.1041	18	299	512.04	204.485	3	1	3	17	0.454545	5	0	5.16993	1.82	84	C13H10NO3	17	0	61.7009	75.38	4	2	0	4	17	27	0	0	2	0	0	0
ZINC00142608	CC1CC[NH+](CC1)Cc2c[nH]c3c2cccc3	229.17	218	3	1.9827	0	2	20.23	2	2	0	0.799014	2.89	42.6027	9	10	38	24.9373	19	290	1328.02	221.893	0	2	0	9	0.5	3	0	5.24793	3.094	90	C15H21N2	17	0.184211	71.0974	20.23	2	2	0	2	17	38	0	0	3	1	1	1
ZINC00210331	c1ccc2c(c1)ncn2Cc3ccc(cc3)F	226.091	172	3	3.2237	2	0	17.82	2	3	0	0.694894	2.67	34.7317	15	16	28	16.5283	19	290	628.03	190.537	1	0	0	9	0.5	3	0	5.24793	3.492	90	C14H11FN2	17	0.0357143	65.235	17.82	2	0	0	3	17	28	0	0	3	0	0	1
ZINC00266303	CCOC(=O)c1cc(no1)c2ccc(cc2)C	231.09	117	5	2.82672	4	0	52.33	3	2	0	0.816779	2.45	35.0543	11	11	30	19.0017	18	289	689.04	208.44	2	0	5	14	0.454545	6	0	5.16993	3.411	84	C13H13NO3	17	0.1	62.6325	52.33	4	0	0	4	17	30	0	0	2	0	0	1
ZINC00266304	CCOC(=O)c1cc(no1)c2ccc(cc2)F	235.064	117	5	2.6574	4	0	52.33	3	2	0	0.902027	2.23	31.8509	11	11	27	16.9251	18	289	512.05	197.212	2	0	5	14	0.454545	6	0	5.16993	3.135	84	C12H10FNO3	17	0.0740741	57.8535	52.33	4	0	0	5	17	27	0	0	2	0	0	1
ZINC00368040	CC(C)COc1ccc(cc1)c2csc(n2)N	248.098	107	5	3.4271	4	1	76.38	4	2	0	0.82819	2.45	39.4507	11	11	33	22.3473	18	297	884.04	223.002	2	1	4	13	0.454545	7	0	5.16993	3.034	84	C13H16N2OS	17	0.121212	72.2954	48.14	3	2	0	4	17	33	0	0	2	0	0	1
ZINC00380718	CCC(=O)Nc1c2ccccc2oc1C(=O)N	232.085	126	1	1.8802	3	2	85.33	3	2	0	0.804897	2.23	33.7275	9	10	29	16.9505	18	217	628.05	202.141	4	2	4	15	0.5	4	0	5.16993	1.226	86	C12H12N2O3	17	0.0689655	63.6526	85.33	5	3	2	5	17	29	0	0	2	0	0	1
ZINC00468532	Cc1ccccc1c2nc(c(o2)N(C)C)C#N	227.106	2	2	2.5877	4	0	53.06	2	2	0	0.897753	2.45	35.6503	11	11	30	20.0877	18	223	689.04	210.217	3	0	3	14	0.5	5	0	5.16993	2.99	86	C13H13N3O	17	0.1	65.718	53.06	4	0	0	4	17	30	0	0	2	0	0	1
ZINC00502908	Cc1ccc(s1)CNc2cccc(c2)C(=O)[O-]	246.059	58	4	2.03212	4	1	80.4	4	2	0	0.729286	2.45	36.4855	11	11	29	17.9745	18	281	628.04	216.841	3	1	3	10	0.5	6	0	5.16993	1.425	84	C13H12NO2S	17	0.0689655	67.1552	52.16	3	1	0	4	17	29	0	0	2	0	0	1
ZINC00542893	CCNC(=O)N1CCNC(=O)[C@H]1CC(=O)OC	243.122	318	2	-0.9206	4	2	87.74	3	0	0	0.787691	1.79	35.4435	0	0	34	26.6745	17	225	884.07	229.402	7	2	5	4	0.444444	6	0	5.08746	-1.159	78	C10H17N3O4	17	0.205882	59.2094	87.74	7	2	3	7	17	34	1	0	1	1	1	0
ZINC00031969	COc1cccc(c1)Nc2c3c([nH]cn3)ncn2	241.096	276	2	2.1051	5	2	75.72	3	3	0	0.68289	2.12	34.7567	15	16	29	19.2213	20	288	655.06	191.658	4	2	2	17	0.444444	4	0	5.32193	1.607	94	C12H11N5O	18	0.0344828	67.9604	75.72	6	2	0	6	18	29	0	0	3	0	0	2
ZINC00179057	c1ccc(cc1)NC(=O)NCCN2CCCC2=O	247.132	20	1	1.4305	2	2	61.44	4	1	0	0.874628	2.34	39.1195	6	6	35	23.8005	19	335	990.05	235.18	5	2	5	10	0.454545	4	0	5.24793	0.536	86	C13H17N3O2	18	0.142857	69.2774	61.44	5	2	3	5	18	35	0	0	2	1	1	0
ZINC00198813	Cc1ccc(cc1N)c2cnc3ccccc3n2	235.111	271	1	3.18742	3	1	51.8	1	3	1	0.662783	2.78	38.3683	16	17	31	16.1917	20	302	783.03	210.125	3	1	0	17	0.5	3	0	5.32193	2.4	96	C15H13N3	18	0.0322581	74.1234	51.8	3	2	0	3	18	31	0	0	3	0	0	1
ZINC00376589	CN(C)c1ccc(cc1)c2cc(on2)C(=O)OC	246.1	117	5	2.1942	5	0	55.57	3	2	0	0.863601	2.34	36.8211	11	11	32	22.0749	19	311	783.05	219.437	3	0	4	15	0.454545	7	0	5.24793	2.76	90	C13H14N2O3	18	0.09375	67.6055	55.57	5	0	0	5	18	32	0	0	2	0	0	1
ZINC00508336	c1ccc2c(c1)[nH]c(n2)CNC(=O)c3ccco3	241.085	50	5	2.0859	3	2	70.92	3	3	0	0.657795	2.34	35.1187	14	15	29	17.5393	20	321	655.05	195.75	3	2	4	9	0.5	3	0	5.32193	1.142	94	C13H11N3O2	18	0.0344828	65.9719	70.92	5	2	1	5	18	29	0	0	3	0	0	2
ZINC00509816	CC(C)(C(=O)NNc1ccc2ccccc2c1)O	244.121	52	1	2.0538	3	3	61.36	3	2	1	0.776143	2.56	39.1127	10	11	34	18.4493	19	295	919.04	227.943	4	3	5	14	0.5	6	0	5.24793	2.946	92	C14H16N2O2	18	0.0882353	72.0112	61.36	4	3	1	4	18	34	0	0	2	0	0	0
ZINC00521778	CC(=O)c1ccc(cc1)NC(=O)C[NH+]2CCCC2	247.145	216	6	0.5064	2	2	50.61	4	1	0	0.871481	2.56	41.1131	6	6	37	24.6669	19	325	1138.04	242.797	3	2	3	11	0.454545	5	0	5.24793	1.025	88	C14H19N2O2	18	0.162162	69.8739	50.61	4	2	1	4	18	37	0	0	2	1	1	0
ZINC00521978	CC1(C[C@@H](CCO1)C(=O)NCc2ccccc2)C	247.157	86	2	2.508	2	1	38.33	3	1	0	0.822792	2.78	43.1067	6	6	39	26.4913	19	303	1294.03	250.415	3	1	4	6	0.5	5	0	5.24793	2.313	90	C15H21NO2	18	0.205128	71.0437	38.33	3	1	1	3	18	39	1	0	2	1	1	0
ZINC01243299	Cc1cc(n2c(n1)ncn2)Nc3ccc(cc3)O	241.096	278	1	1.88192	6	2	75.34	2	3	1	0.721404	2.12	34.7567	15	16	29	17.3053	20	290	655.06	191.658	4	2	0	17	0.444444	4	0	5.32193	1.531	96	C12H11N5O	18	0.0344828	66.9085	75.34	6	2	0	6	18	29	0	0	3	0	0	2
ZINC00167737	c1ccc(cc1)c2ccc(cc2)c3ccnc(n3)N	247.111	268	3	3.3928	3	1	51.8	2	3	0	0.452443	2.89	40.1283	18	18	32	16.1917	21	355	814.03	224.785	3	1	0	19	0.454545	3	0	5.39232	3.609	98	C16H13N3	19	0	77.3164	51.8	3	2	0	3	19	32	0	0	3	0	0	1
ZINC00265638	C1CC[NH+](CC1)CCC(=O)[O-]	157.11	376	2	-1.8048	2	1	44.57	3	0	0	0.71865	2.01	26.7859	0	0	26	19.6341	11	120	566.03	160.509	2	1	4	2	0.428571	4	0	4.45943	-0.173	48	C8H15NO2	11	0.269231	39.0387	44.57	3	1	0	3	11	26	0	0	1	1	1	0
ZINC00323233	COc1ccc2c(c1)nc(s2)N	180.036	150	3	1.8871	4	1	76.38	1	2	0	0.7197	1.9	25.3163	9	10	20	13.6017	13	134	309.04	139.158	2	1	2	11	0.428571	3	0	4.70044	1.029	62	C8H8N2OS	12	0.05	50.5844	48.14	3	2	0	4	12	20	0	0	2	0	0	1
ZINC00392018	COc1ccc(cc1OC)C[NH3+]	168.102	127	3	0.4457	2	1	46.1	3	1	0	0.625547	2.12	27.8791	6	6	26	17.8169	12	122	544.03	162.95	0	1	2	8	0.428571	6	0	4.58496	1.24	54	C9H14NO2	12	0.115385	46.1381	46.1	3	3	0	3	12	26	0	0	1	0	0	0
ZINC00225417	CCOc1ccc(cc1)CC(=O)[O-]	179.071	132	3	0.3777	3	0	49.36	4	1	0	0.756597	2.23	27.3407	6	6	24	15.8573	13	171	420.03	172.766	2	0	3	7	0.444444	6	0	4.70044	1.306	58	C10H11O3	13	0.125	46.322	49.36	3	0	0	3	13	24	0	0	1	0	0	0
ZINC00530971	c1cc(ccc1c2nnc(s2)N)O	193.031	69	2	1.4929	5	2	100.27	1	2	0	0.643357	1.79	25.7496	11	11	20	10.5924	14	167	285.05	147.519	3	2	0	13	0.5	3	0	4.80735	2.023	66	C8H7N3OS	13	0	51.4222	72.03	4	3	0	5	13	20	0	0	2	0	0	1
ZINC01566885	COc1ccc(cc1)NC(=O)C[NH3+]	181.098	143	5	-0.1244	2	2	65.97	3	1	0	0.823387	2.01	28.3123	6	6	26	16.4257	13	171	520.04	171.31	2	2	4	10	0.444444	5	0	4.70044	0.621	58	C9H13N2O2	13	0.0769231	49.3788	65.97	4	4	1	4	13	26	0	0	1	0	0	0
ZINC01407761	c1cc(ccc1c2ccnc(n2)N)Cl	205.041	268	3	2.3792	3	1	51.8	1	2	0	0.792151	2.12	28.4143	12	12	22	11.1457	15	183	347.04	167.386	3	1	0	13	0.5	3	0	4.90689	2.291	70	C10H8ClN3	14	0	56.8904	51.8	3	2	0	4	14	22	0	0	2	0	0	1
ZINC00120262	CCOc1ccccc1N2CC[NH2+]CC2	207.15	181	1	0.4687	2	1	29.08	3	1	0	0.75831	2.45	36.7911	6	6	34	24.6669	16	192	1015.03	204.688	1	1	3	8	0.5	4	0	5	2.205	72	C12H19N2O	15	0.176471	61.4834	29.08	3	2	0	3	15	34	0	0	2	1	1	0
ZINC00206876	CC1(C[C@H](CCO1)[NH2+]Cc2ccco2)C	210.149	373	1	1.3006	2	1	38.98	3	1	0	0.835402	2.45	37.1599	5	5	35	25.6961	16	209	1086.03	205.118	1	1	2	5	0.5	5	0	5	1.573	76	C12H20NO2	15	0.228571	57.3904	38.98	3	2	0	3	15	35	1	0	2	1	1	1
ZINC00532170	CC1CCN(CC1)c2ccc(cc2Cl)N	224.108	175	2	3.1585	2	1	29.26	1	1	1	0.806903	2.45	36.8355	6	6	32	20.3245	16	213	879.03	209.791	2	1	0	8	0.444444	4	0	5	3.528	76	C12H17ClN2	15	0.1875	66.4754	29.26	2	2	0	3	15	32	0	0	2	1	1	0
ZINC00530912	CC(C)C(=O)N1CCN(CC1)c2ccc(cc2)N	247.168	176	4	1.5734	3	1	49.57	2	1	1	0.824688	2.56	42.7447	6	6	39	27.2153	19	313	1294.04	246.322	4	1	4	8	0.454545	5	0	5.24793	1.512	90	C14H21N3O	18	0.179487	74.4854	49.57	4	2	1	4	18	39	0	0	2	1	1	0
ZINC00539106	CC(C)C(=O)N1CCN(CC1)c2ccccc2N	247.168	176	4	1.5734	3	1	49.57	2	1	1	0.676164	2.56	42.7447	6	6	39	27.2153	19	289	1294.04	246.322	4	1	4	8	0.5	5	0	5.24793	1.512	90	C14H21N3O	18	0.179487	74.4854	49.57	4	2	1	4	18	39	0	0	2	1	1	0
ZINC00056577	COc1ccc2c(cc(=O)oc2c1)CC(=O)[O-]	233.045	136	2	0.094	5	0	79.57	3	2	1	0.62604	2.23	31.1311	10	11	26	16.5449	18	235	457.05	207.31	2	0	3	12	0.444444	5	0	5.16993	1.511	86	C12H9O5	17	0.0769231	57.747	79.57	5	0	0	5	17	26	0	0	2	0	0	1
ZINC00346211	C[NH+](C)Cc1ccc(cc1)C#N	161.108	215	2	0.20278	1	1	28.23	2	1	0	0.682791	2.34	28.4683	6	6	25	16.1917	12	140	493.02	168.389	1	1	3	8	0.5	4	0	4.58496	1.337	54	C10H13N2	12	0.12	47.6717	28.23	2	1	0	2	12	25	0	0	1	0	0	0
ZINC00134415	CNC(=O)c1ccc(cc1)NC(=O)NC	207.101	76	3	0.7975	2	3	70.23	2	1	0	0.806514	2.01	31.1723	6	6	28	18.1077	15	219	574.05	195.648	5	3	4	13	0.5	4	0	4.90689	0.321	68	C10H13N3O2	15	0.0714286	57.9106	70.23	5	3	3	5	15	28	0	0	1	0	0	0
ZINC00240923	CCOc1ccccc1C[NH+]2CCC(CC2)O	236.165	211	6	0.6249	2	2	33.9	4	1	0	0.617313	2.67	42.0134	6	6	39	27.2866	18	272	1328.03	237.073	1	2	3	7	0.5	6	0	5.16993	1.786	82	C14H22NO2	17	0.205128	67.2525	33.9	3	2	0	3	17	39	0	0	2	1	1	0
ZINC01420506	COc1ccc(cc1)[C@@H](C(=O)[O-])[NH3+]	181.074	128	3	-1.2719	3	1	77	3	1	0	0.878214	2.01	26.6807	6	6	24	14.5373	13	153	420.04	167.785	2	1	4	7	0.5	6	0	4.70044	0.359	60	C9H11NO3	13	0.0833333	43.6301	77	4	3	0	4	13	24	1	0	1	0	0	0
ZINC00271638	c1ccc(cc1)c2nc(on2)c3ccccc3O	238.074	5	1	3.1092	4	1	59.15	2	3	0	0.67669	2.56	35.1119	17	17	28	14.1681	20	305	594.04	199.413	1	1	0	18	0.5	3	0	5.32193	3.698	94	C14H10N2O2	18	0	66.8348	59.15	4	1	0	4	18	28	0	0	3	0	0	1
ZINC00205967	Cc1c(=O)n(c(nn1)Nc2ccccc2OC)N	247.107	57	1	0.41272	7	2	95.06	3	2	0	0.839879	1.9	35.1323	12	12	31	19.0657	19	266	718.07	219.945	4	2	2	16	0.444444	6	0	5.24793	0.988	90	C11H13N5O2	18	0.0645161	67.4561	95.06	7	3	0	7	18	31	0	0	2	0	0	1
ZINC00088862	Cc1nnc(Nc2cccc(c2)F)s1	209.042	11	6	2.72922	4	1	66.05	2	2	0	0.713931	1.9	27.9313	11	11	22	14.2087	15	188	347.05	162.092	3	1	0	12	0.5	4	0	4.90689	2.905	70	C9H8FN3S	14	0.0454545	54.3287	37.81	3	1	0	5	14	22	0	0	2	0	0	1
C14H19N	c1ccc(cc1)N(CCC#N)CC	174.116	177	1	2.42658	2	0	27.03	4	1	0	0.64276	2.45	30.8951	6	6	27	17.9449	13	155	573.02	184.367	2	0	7	7	0.5	5	0	4.70044	2.305	56	C11H14N2	13	0.148148	54.559	27.03	2	0	0	2	13	27	0	0	1	0	0	0
ZINC00249675	CC(=O)Nc1nnc(s1)COC	187.042	297	5	0.6429	5	1	92.35	3	1	0	0.704511	1.46	24.3651	5	5	21	16.9729	12	141	309.06	150.246	5	1	3	8	0.5	5	0	4.58496	0.268	54	C6H9N3O2S	12	0.142857	44.9257	64.11	5	1	1	6	12	21	0	0	1	0	0	1
ZINC00296612	Cc1c([nH]c2c1cc(cc2)F)C	163.08	13	2	2.92384	0	1	15.79	0	2	0	0.592309	2.34	25.9249	9	10	22	12.7951	13	116	397.02	141.522	0	1	0	9	0.5	3	0	4.70044	2.753	64	C10H10FN	12	0.0909091	47.7307	15.79	1	1	0	2	12	22	0	0	2	0	0	1
ZINC00316386	C[NH+](C)Cc1ccc(o1)C(=O)[O-]	169.074	339	3	-1.7124	3	1	57.71	3	1	0	0.725931	1.9	24.9207	5	5	23	17.1773	12	127	397.04	153.126	2	1	3	8	0.428571	6	0	4.58496	-0.542	56	C8H11NO3	12	0.130435	39.5532	57.71	4	1	0	4	12	23	0	0	1	0	0	1
ZINC00093607	CS(=O)(=O)NCCc1ccccc1	199.067	194	2	0.7783	2	1	54.55	4	1	0	0.749103	2.01	30.1123	6	6	26	21.3477	13	165	520.04	180.141	3	1	5	6	0.5	5	0	4.70044	1.286	60	C9H13NO2S	13	0.115385	52.9925	46.17	3	1	0	4	13	26	0	0	1	0	0	0
ZINC00291833	CC(=O)Nc1cccc2c1non2	177.054	356	3	1.1812	4	1	68.02	1	2	0	0.772161	1.79	23.6516	9	10	20	11.1864	14	135	285.05	137.8	2	1	3	12	0.5	2	0	4.80735	1.926	66	C8H7N3O2	13	0.05	46.1077	68.02	5	1	1	5	13	20	0	0	2	0	0	1
ZINC00359840	Cc1ccsc1C[NH2+]C(C)(C)CO	200.111	385	2	0.89082	2	2	65.08	4	1	0	0.732377	2.23	34.4043	5	5	31	21.9577	13	147	805.03	192.601	1	2	5	5	0.428571	8	0	4.70044	1.057	62	C10H18NOS	13	0.193548	55.8502	36.84	2	3	0	3	13	31	0	0	1	0	0	1
ZINC00570736	c1cc(cnc1)C[NH2+]C2CCCC2	177.139	236	3	1.0876	1	1	29.5	3	1	0	0.739709	2.45	32.8955	6	6	30	19.9045	14	179	805.02	178.602	1	1	2	6	0.5	3	0	4.80735	1.653	62	C11H17N2	13	0.2	52.1224	29.5	2	2	0	2	13	30	0	0	2	1	1	1
ZINC00810267	c1cocc1C[NH2+]C[C@H]2CCCO2	182.118	372	2	0.522	2	1	38.98	4	1	0	0.793291	2.23	30.9727	5	5	29	21.3233	14	184	744.03	170.526	1	1	3	5	0.5	4	0	4.80735	0.641	62	C10H16NO2	13	0.206897	48.1784	38.98	3	2	0	3	13	29	1	0	2	1	1	1
ZINC00250523	c1cc(sc1)CNc2ccc(cc2)O	205.056	47	4	3.0658	3	2	60.5	3	2	1	0.760833	2.34	31.4967	11	11	25	14.9653	15	211	494.03	177.413	1	2	2	8	0.444444	4	0	4.90689	2.034	68	C11H11NOS	14	0.04	59.7525	32.26	2	2	0	3	14	25	0	0	2	0	0	1
ZINC00029515	CC[C@H](C)c1ccc(cc1)NS(=O)(=O)C	227.098	131	5	2.5716	2	1	54.55	4	1	0	0.65295	2.23	36.2995	6	6	32	25.7205	15	203	814.04	214.733	3	1	4	10	0.444444	7	0	4.90689	3.236	72	C11H17NO2S	15	0.15625	63.6145	46.17	3	1	0	4	15	32	1	0	1	0	0	0
ZINC00039724	Cn1c2c(c(=O)[nH]c1=O)[nH]c(n2)N(C)C	209.091	315	1	-0.9841	5	2	86.78	1	2	0	0.809248	1.57	28.5187	9	10	26	20.5413	16	168	519.07	173.33	2	2	3	12	0.428571	4	0	5	1.676	80	C8H11N5O2	15	0.115385	56.2824	86.78	7	2	0	7	15	26	0	0	2	0	0	2
ZINC00135487	Cc1ccc(cc1)c2ccc([nH]2)C(=O)[O-]	200.071	155	1	1.35362	2	1	55.92	2	2	0	0.78771	2.45	30.4919	11	11	25	13.5081	16	216	466.03	181.036	2	1	3	14	0.444444	4	0	5	2.356	76	C12H10NO2	15	0.04	55.2962	55.92	3	1	0	3	15	25	0	0	2	0	0	1
ZINC00357574	c1cc(ccc1C[NH2+]C[C@H]2CCCO2)F	210.129	240	4	1.0681	1	1	25.84	4	1	0	0.829899	2.45	34.9145	6	6	32	21.7035	16	251	879.03	199.759	1	1	3	6	0.5	5	0	5	2.16	72	C12H17FNO	15	0.1875	55.8704	25.84	2	2	0	3	15	32	1	0	2	1	1	0
ZINC00476365	C1CCCC(CC1)NC(=O)[C@H]2CCCO2	211.157	303	2	2.0044	2	1	38.33	2	0	0	0.770399	2.45	37.8267	0	0	36	26.4913	16	206	1159.03	217.336	3	1	3	3	0.5	2	0	5	2.198	72	C12H21NO2	15	0.305556	58.6067	38.33	3	1	1	3	15	36	1	0	2	2	2	0
ZINC00046867	C1CCC(CC1)NC(=O)NC[C@H]2CCCO2	226.168	303	2	1.7973	2	2	50.36	3	0	0	0.749628	2.34	39.5934	0	0	38	28.2446	17	268	1281.04	228.333	4	2	4	4	0.5	3	0	5.08746	1.531	76	C12H22N2O2	16	0.289474	62.3814	50.36	4	2	2	4	16	38	1	0	2	2	2	0
ZINC00074809	COc1ccc(cc1)[C@@H](c2ccccc2)[NH3+]	214.123	127	3	2.0265	1	1	36.87	3	2	0	0.886744	2.78	37.2107	12	12	32	18.0873	17	253	849.02	209.474	0	1	2	7	0.5	5	0	5.08746	3.168	78	C14H16NO	16	0.0625	64.1671	36.87	2	3	0	2	16	32	1	0	2	0	0	0
ZINC00145371	CCOC(=O)Nc1nc2ccc(cc2s1)C	236.062	149	3	3.17312	4	1	79.46	2	2	0	0.86495	2.12	34.0655	9	10	28	20.2525	17	253	601.05	197.2	4	1	5	13	0.5	5	0	5.08746	2.216	80	C11H12N2O2S	16	0.107143	65.0017	51.22	4	1	1	5	16	28	0	0	2	0	0	1
ZINC00149765	CC(C)Oc1ccc(cc1)c2csc(n2)N	234.083	107	5	3.1795	4	1	76.38	3	2	0	0.834685	2.34	36.3571	11	11	30	20.1609	17	254	721.04	205.706	2	1	3	13	0.5	6	0	5.08746	2.839	80	C12H14N2OS	16	0.1	67.7264	48.14	3	2	0	4	16	30	0	0	2	0	0	1
ZINC00190498	c1cc(cc(c1)F)NC(=O)c2cnccn2	217.065	22	4	1.868	3	1	54.88	2	2	0	0.829034	2.12	29.3533	12	12	24	14.2067	17	240	385.05	181.692	4	1	3	15	0.444444	3	0	5.08746	0.739	78	C11H8FN3O	16	0	56.3852	54.88	4	1	1	5	16	24	0	0	2	0	0	1
ZINC00239843	CC(C)[NH+]1CCN(CC1)C(=O)c2cccs2	239.122	334	3	0.4972	2	1	52.99	2	1	0	0.749533	2.34	39.6911	5	5	35	27.3089	17	236	1056.04	223.197	2	1	3	8	0.444444	4	0	5.08746	0.998	80	C12H19N2OS	16	0.2	66.0552	24.75	3	1	1	4	16	35	0	0	2	1	1	1
ZINC00460907	Cc1ccc(cc1C)C(=O)Nc2nc[nH]n2	216.101	84	2	1.67384	3	2	70.67	2	2	0	0.821101	2.12	32.5635	11	11	28	16.7165	17	237	601.05	189.258	4	2	3	14	0.444444	4	0	5.08746	2.263	80	C11H12N4O	16	0.0714286	60.2519	70.67	5	2	1	5	16	28	0	0	2	0	0	1
ZINC00469224	c1cc(ccc1NC(=O)N2CCOCC2)O	222.1	43	7	1.2563	3	2	61.8	1	1	1	0.661602	2.12	33.3011	6	6	30	20.8189	17	259	721.05	201.018	4	2	3	11	0.5	2	0	5.08746	0.252	78	C11H14N2O3	16	0.133333	59.5175	61.8	5	2	2	5	16	30	0	0	2	1	1	0
ZINC00808022	c1ccc(cc1)C2CC[NH+](CC2)CC(=O)[O-]	219.126	221	1	-0.8012	2	1	44.57	3	1	0	0.755282	2.56	36.9195	6	6	33	21.8205	17	255	916.03	215.823	2	1	3	6	0.5	4	0	5.08746	1.049	78	C13H17NO2	16	0.181818	58.9877	44.57	3	1	0	3	16	33	0	0	2	1	1	0
ZINC00812169	C[C@H]1CCCC[NH+]1Cc2ccccc2C#N	215.155	214	2	1.51558	1	1	28.23	2	1	0	0.869881	2.78	39.5091	6	6	35	22.7509	17	215	1056.02	225.217	1	1	2	8	0.5	3	0	5.08746	2.661	78	C14H19N2	16	0.2	64.0037	28.23	2	1	0	2	16	35	2	1	2	1	1	0
ZINC00813685	CC(C)(C)NC(=O)c1ccc2c(c1)nns2	235.078	202	2	2.2196	4	1	83.12	1	2	0	0.657338	2.12	35.0303	9	10	29	19.4297	17	214	660.05	199.407	4	1	5	12	0.5	5	0	5.08746	2.453	84	C11H13N3OS	16	0.137931	64.6342	54.88	4	1	1	5	16	29	0	0	2	0	0	1
ZINC00967126	c1cc(cnc1)C[NH2+][C@H]2CS(=O)(=O)C[C@@H]2O	243.08	236	3	-1.6971	4	2	92.25	3	1	0	0.528068	1.9	35.1079	6	6	31	24.1941	17	243	784.06	206.185	4	2	2	6	0.444444	4	0	5.08746	-0.701	82	C10H15N2O3S	16	0.16129	58.315	83.87	5	3	0	6	16	31	2	0	2	1	1	1
ZINC01503145	C[NH+]1CCC(CC1)[NH+]2CCC[C@H](C2)C(=O)[O-]	227.176	380	1	-3.2917	2	2	49.01	2	0	0	0.732112	2.34	40.2602	0	0	39	29.6998	17	232	1360.04	229.651	2	2	3	2	0.444444	4	0	5.08746	-0.424	80	C12H23N2O2	16	0.282051	58.0704	49.01	4	2	0	4	16	39	2	1	2	2	2	0
ZINC00034471	C[NH+]1CCN(CC1)C(=O)c2ccc(c(c2)F)F	241.115	226	3	-0.0647	1	1	24.75	1	1	0	0.804876	2.23	35.2379	6	6	32	23.0621	18	268	817.05	214.187	2	1	2	9	0.5	4	0	5.16993	1.375	86	C12H15F2N2O	17	0.15625	58.8822	24.75	3	1	1	5	17	32	0	0	2	1	1	0
ZINC00051670	c1ccc(cc1)COCc2c[nH]c(=O)[nH]c2=O	232.085	199	1	0.78	3	2	74.95	4	2	0	0.850592	2.23	33.7275	12	12	29	18.2705	18	307	628.05	213.041	1	2	3	8	0.454545	4	0	5.16993	1.239	82	C12H12N2O3	17	0.0689655	62.6184	74.95	5	2	0	5	17	29	0	0	2	0	0	1
ZINC00054712	c1ccc(c(c1)CNc2ccc(cc2)F)CO	231.106	26	5	2.9301	2	2	32.26	4	2	0	0.866835	2.67	36.4341	12	12	31	17.1679	18	282	752.03	214.223	2	2	2	7	0.5	6	0	5.16993	2.728	82	C14H14FNO	17	0.0645161	66.0915	32.26	2	2	0	3	17	31	0	0	2	0	0	0
ZINC00064677	c1cc(ccc1CC(=O)NC2CCCCC2)F	235.137	98	3	2.8171	1	1	29.1	3	1	0	0.871886	2.67	39.1013	6	6	35	22.4987	18	303	1024.03	230.396	2	1	3	6	0.454545	4	0	5.16993	3.228	82	C14H18FNO	17	0.2	65.1197	29.1	2	1	1	3	17	35	0	0	2	1	1	0
ZINC00285400	CC(C)CC(=O)NCc1ccc2c(c1)OCO2	235.121	89	3	2.0776	3	1	47.56	4	1	0	0.810894	2.45	37.7215	6	6	34	24.0345	18	285	953.04	224.613	2	1	6	8	0.5	6	0	5.16993	2.239	84	C13H17NO3	17	0.176471	63.8667	47.56	4	1	1	4	17	34	0	0	2	0	1	0
ZINC00289523	CC(=O)Nc1ccc(cc1)Nc2ccccc2	226.111	29	11	3.3886	2	2	41.13	3	2	0	0.827807	2.67	36.9771	12	12	31	17.5829	18	300	752.03	216.516	3	2	3	16	0.454545	4	0	5.16993	2.488	82	C14H14N2O	17	0.0322581	70.4704	41.13	3	2	1	3	17	31	0	0	2	0	0	0
ZINC00319638	CC(=O)Nc1cc(ccc1O)c2ccccc2	227.095	29	11	3.0176	2	2	49.33	2	2	1	0.844686	2.67	36.0123	12	12	30	15.8297	18	248	689.03	214.309	2	2	3	16	0.444444	4	0	5.16993	3.239	84	C14H13NO2	17	0.0333333	67.8465	49.33	3	2	1	3	17	30	0	0	2	0	0	0
ZINC00323795	Cc1nc(c(s1)NC(=O)OC)c2ccccc2	248.062	108	1	3.29682	4	1	79.46	2	2	0	0.838733	2.23	35.8255	11	11	29	20.2525	18	241	628.05	211.86	4	1	4	15	0.444444	5	0	5.16993	2.134	84	C12H12N2O2S	17	0.0689655	68.3147	51.22	4	1	1	5	17	29	0	0	2	0	0	1
ZINC00347383	c1cc(oc1)CNC(=O)Nc2ccc(cc2)F	234.08	47	4	2.7404	2	2	54.27	3	2	0	0.775341	2.23	32.8157	11	11	28	17.4223	18	308	569.05	199.418	3	2	4	10	0.454545	4	0	5.16993	1.484	82	C12H11FN2O2	17	0.0357143	60.9664	54.27	4	2	2	5	17	28	0	0	2	0	0	1
ZINC00413840	CC[NH+]1CCN(CC1)C(=O)NC2CCCCC2	240.208	312	1	0.2491	1	2	36.78	2	0	0	0.729105	2.45	44.3186	0	0	43	33.3414	18	297	1664.04	249.154	3	2	3	4	0.454545	3	0	5.16993	1.227	82	C13H26N3O	17	0.27907	68.2154	36.78	4	2	2	4	17	43	0	0	2	2	2	0
ZINC00445989	c1cnccc1c2nc(on2)C3CCCCC3	229.122	7	1	3.1793	4	0	51.81	2	2	0	0.784809	2.45	36.9839	11	11	32	20.9541	19	288	884.04	203.133	2	0	0	11	0.5	2	0	5.24793	3.048	88	C13H15N3O	17	0.1875	63.355	51.81	4	0	0	4	17	32	0	0	3	1	1	2
ZINC00452948	c1ccn(c1)c2ccc(cc2)N3CCOCC3	228.126	178	4	2.3139	3	0	17.4	2	2	0	0.792862	2.67	38.3107	11	11	33	23.3673	19	292	953.03	209.432	2	0	0	12	0.5	2	0	5.24793	2.618	88	C14H16N2O	17	0.121212	68.801	17.4	3	0	0	3	17	33	0	0	3	1	1	1
ZINC00793218	CC1CCN(CC1)c2ccc(cc2N)C(=O)[O-]	233.129	61	2	0.8686	4	1	69.39	2	1	1	0.739944	2.45	38.0195	6	6	34	21.8205	18	266	953.04	225.501	4	1	3	11	0.5	5	0	5.16993	2.04	86	C13H17N2O2	17	0.176471	65.7959	69.39	4	2	0	4	17	34	0	0	2	1	1	0
ZINC00101547	Cc1ccc(cc1)C(=O)n2cnc3c2cccc3	236.095	172	3	3.03322	3	0	34.89	1	3	0	0.716395	2.78	37.4035	15	16	30	17.3765	20	301	718.03	207.919	2	0	2	17	0.5	2	0	5.32193	2.842	96	C15H12N2O	18	0.0333333	70.6405	34.89	3	0	0	3	18	30	0	0	3	0	0	1
ZINC00134407	c1ccc2c(c1)ccc(c2O)C[NH+]3CCOCC3	244.134	213	13	0.9605	2	2	33.9	2	2	0	0.873368	2.78	41.1063	10	11	36	22.9137	20	304	1138.03	225.84	1	2	0	11	0.5	3	0	5.32193	2.074	94	C15H18NO2	18	0.138889	70.8325	33.9	3	2	0	3	18	36	0	0	3	1	1	0
ZINC00172225	c1cc2c(cc1C[NH2+]Cc3ccncc3)OCO2	243.113	231	6	1.0739	3	1	47.96	4	2	0	0.898521	2.56	38.4459	12	12	33	21.5501	20	352	919.04	216.904	1	1	3	8	0.454545	4	0	5.32193	1.593	92	C14H15N2O2	18	0.0909091	66.1354	47.96	4	2	0	4	18	33	0	0	3	0	1	1
ZINC00191601	Cc1ccccc1OCC(=O)Nc2cccnc2	242.106	145	5	2.40752	3	1	51.22	4	2	0	0.813204	2.56	37.7791	12	12	32	20.1589	19	328	783.04	225.306	3	1	4	9	0.454545	5	0	5.24793	1.649	86	C14H14N2O2	18	0.0625	69.5407	51.22	4	1	1	4	18	32	0	0	2	0	0	1
ZINC00209829	Cc1cccc(c1C)NC(=O)C[NH+]2CCOCC2	249.16	216	6	0.15704	2	2	42.77	3	1	0	0.812679	2.56	42.4467	6	6	39	27.8113	19	299	1294.04	245.434	3	2	3	9	0.5	5	0	5.24793	0.905	88	C14H21N2O2	18	0.179487	70.9284	42.77	4	2	1	4	18	39	0	0	2	1	1	0
ZINC00239832	CC[C@@H](C)[NH+]1CCN(CC1)C(=O)c2ccncc2	248.176	223	1	0.2208	2	1	37.64	3	1	0	0.843587	2.56	43.4114	6	6	40	29.6286	19	313	1375.04	247.64	3	1	4	9	0.454545	5	0	5.24793	1.042	88	C14H22N3O	18	0.2	70.5902	37.64	4	1	1	4	18	40	1	0	2	1	1	1
ZINC00249866	c1ccc(cc1)NC(=O)N2CCC(CC2)C(=O)N	247.132	43	7	1.4158	2	2	75.43	2	1	0	0.810966	2.34	39.1195	6	6	35	22.4805	19	318	990.05	235.18	5	2	3	10	0.454545	2	0	5.24793	0.246	88	C13H17N3O2	18	0.142857	68.9521	75.43	5	3	3	5	18	35	0	0	2	1	1	0
ZINC00319713	c1cc(cnc1)CNc2ccc(cc2N)C(=O)[O-]	242.093	59	2	0.6394	5	2	91.07	4	2	1	0.756836	2.34	35.7855	12	12	30	16.3545	19	320	655.05	217.689	5	2	3	11	0.454545	6	0	5.24793	0.443	88	C13H12N3O2	18	0.0333333	66.7486	91.07	5	3	0	5	18	30	0	0	2	0	0	1
ZINC00451301	Cc1ccc(cc1)OCC(=O)N2CC[NH+](CC2)C	249.16	190	2	-0.26928	2	1	33.98	3	1	0	0.818061	2.56	42.4467	6	6	39	29.1313	19	345	1294.04	245.434	2	1	4	7	0.5	5	0	5.24793	1.172	88	C14H21N2O2	18	0.179487	69.8747	33.98	4	1	1	4	18	39	0	0	2	1	1	0
ZINC00486827	CCc1ccc(cc1)OCC(=O)N2CCCCC2	247.157	189	4	2.6403	2	0	29.54	4	1	0	0.852504	2.78	43.1067	6	6	39	27.8113	19	347	1294.03	250.415	2	0	4	7	0.5	5	0	5.24793	3.016	86	C15H21NO2	18	0.205128	71.746	29.54	3	0	1	3	18	39	0	0	2	1	1	0
ZINC00558131	CCOc1cccc(c1)C(=O)Nc2nnn(n2)C	247.107	203	6	0.8611	6	1	81.93	4	2	0	0.73154	1.9	35.1323	11	11	31	19.7257	19	313	718.07	209.045	5	1	3	15	0.454545	6	0	5.24793	1.806	88	C11H13N5O2	18	0.0967742	64.3622	81.93	7	1	1	7	18	31	0	0	2	0	0	1
ZINC00295638	CCOc1ccc(cc1)[C@@H](C)[NH3+]	166.123	130	2	1.3882	1	1	36.87	3	1	0	0.837871	2.34	30.1707	6	6	28	18.0873	12	140	652.02	171.456	0	1	3	7	0.5	6	0	4.58496	2.542	54	C10H16NO	12	0.142857	48.9141	36.87	2	3	0	2	12	28	1	0	1	0	0	0
ZINC00299710	c1cc2c(cc1C[NH2+]C[C@H]3CCCO3)OCO2	236.129	231	6	0.6577	3	1	44.3	4	1	0	0.605938	2.45	38.3883	6	6	35	25.4257	19	307	1097.04	216.211	1	1	3	8	0.5	4	0	5.24793	1.488	88	C13H18NO3	17	0.2	62.0354	44.3	4	2	0	4	17	35	1	0	3	1	2	0
ZINC00034156	CCn1c(ccn1)C[NH2+]C	140.119	368	1	-0.4038	2	1	34.43	3	1	0	0.703896	1.9	24.9551	5	5	24	17.2849	10	89	486.03	135.407	1	1	3	5	0.5	5	0	4.32193	0.654	44	C7H14N3	10	0.166667	39.4544	34.43	3	2	0	3	10	24	0	0	1	0	0	1
ZINC00304622	CS(=O)(=O)NC1CCCC1	163.067	307	1	0.4782	2	1	54.55	2	0	0	0.676182	1.68	24.8323	0	0	23	21.3477	10	82	439.04	147.062	3	1	3	4	0.4	3	0	4.32193	0.677	48	C6H13NO2S	10	0.26087	40.2355	46.17	3	1	0	4	10	23	0	0	1	1	1	0
ZINC00167178	CC(=O)c1ccc(cc1)OC(F)F	186.049	134	2	2.4906	2	0	26.3	3	1	0	0.824245	2.01	23.8923	6	6	21	14.0257	13	155	285.04	160.134	1	0	3	9	0.5	6	0	4.70044	2.528	60	C9H8F2O2	13	0.0952381	43.0785	26.3	2	0	0	4	13	21	0	0	1	0	0	0
ZINC00995905	CCSc1nnc(s1)NC(=O)OC	219.014	301	5	1.8284	6	1	117.65	3	1	1	0.670303	1.35	27.2651	5	5	22	19.2529	13	170	328.07	168.755	5	1	4	9	0.444444	6	0	4.70044	1.831	58	C6H9N3O2S2	13	0.136364	52.3347	64.11	5	1	1	7	13	22	0	0	1	0	0	1
ZINC00028415	COc1ccccc1OCC(=O)NN	196.085	148	1	0.0639	4	2	73.58	4	1	3	0.416266	1.9	28.4475	6	6	26	16.5885	14	176	494.05	178.782	3	2	5	8	0.5	6	0	4.80735	-0.242	62	C9H12N2O3	14	0.0769231	50.8191	73.58	5	3	1	5	14	26	0	0	1	0	0	0
ZINC00571755	CS(=O)(=O)Nc1ccc(cc1)C(=O)N	214.041	133	4	0.157	3	2	97.64	3	1	0	0.842741	1.68	28.2539	6	6	24	18.3661	14	170	394.06	179.995	5	2	3	13	0.5	4	0	4.80735	0.149	68	C8H10N2O3S	14	0.0416667	53.4264	89.26	5	3	1	6	14	24	0	0	1	0	0	0
ZINC00997523	CCc1nnc(s1)NC(=O)C(F)(F)F	225.018	299	4	1.6013	4	1	83.12	2	1	0	0.800069	1.24	23.2338	5	5	20	15.3862	14	171	218.08	159.659	4	1	4	8	0.5	7	0	4.80735	1.738	68	C6H6F3N3OS	14	0.15	43.9717	54.88	4	1	1	8	14	20	0	0	1	0	0	1
ZINC01457001	CS(=O)(=O)NCCc1ccc(cc1)F	217.057	194	2	0.9174	2	1	54.55	4	1	0	0.751033	1.9	30.0025	6	6	26	21.4575	14	195	494.05	186.208	3	1	5	6	0.444444	6	0	4.80735	1.447	66	C9H12FNO2S	14	0.115385	52.9505	46.17	3	1	0	5	14	26	0	0	1	0	0	0
ZINC00040343	COc1cc(nc(n1)N)c2ccccc2	201.09	268	3	1.7344	4	1	61.03	2	2	0	0.7365	2.23	30.7967	12	12	26	15.9213	16	194	519.04	178.261	3	1	2	14	0.5	4	0	5	2.312	74	C11H11N3O	15	0.0384615	58.4324	61.03	4	2	0	4	15	26	0	0	2	0	0	1
ZINC00236863	C[NH+]1CCN(CC1)c2ccc(cc2)C#N	202.134	182	4	-0.10702	2	1	31.47	1	1	0	0.827588	2.45	35.0887	6	6	31	21.4513	16	234	814.03	201.622	2	1	2	9	0.5	2	0	5	1.558	74	C12H16N3	15	0.16129	59.9907	31.47	3	1	0	3	15	31	0	0	2	1	1	0
ZINC00408210	CCc1ccc(cc1)c2c(sc(n2)N)C	218.088	107	5	3.26312	3	1	67.15	2	2	0	0.849465	2.45	35.5551	11	11	29	18.2449	16	215	690.03	196.916	2	1	2	12	0.444444	5	0	5	2.793	76	C12H14N2S	15	0.103448	66.0774	38.91	2	2	0	3	15	29	0	0	2	0	0	1
ZINC00467615	Cn1cc(c(n1)C(=O)NC2CCCC2)Cl	227.083	353	1	1.7459	3	1	46.92	2	1	0	0.848698	2.01	33.2171	5	5	29	19.3229	16	200	690.05	194.986	3	1	3	8	0.5	4	0	5	1.756	76	C10H14ClN3O	15	0.206897	57.9402	46.92	4	1	1	5	15	29	0	0	2	1	1	1
ZINC00035855	CC(=O)c1cccc(c1)NC(=O)C(F)(F)F	231.051	35	2	2.39	2	1	46.17	2	1	0	0.807233	1.9	27.3093	6	6	24	14.9307	16	200	336.06	191.857	3	1	4	11	0.5	7	0	5	1.852	78	C10H8F3NO2	16	0.0833333	51.1312	46.17	3	1	1	6	16	24	0	0	1	0	0	0
ZINC00037406	c1ccc(cc1)NC(=O)Nc2cccnc2	213.09	254	3	2.7256	2	2	54.02	2	2	0	0.863486	2.34	32.5567	12	12	27	15.6233	17	263	544.04	192.921	4	2	3	16	0.5	2	0	5.08746	1.23	76	C12H11N3O	16	0	63.3204	54.02	4	2	2	4	16	27	0	0	2	0	0	1
ZINC00054604	CCS(=O)(=O)NCc1ccc2c(c1)OCO2	243.057	232	1	0.8546	4	1	73.01	4	1	0	0.792862	1.9	33.4763	6	6	29	25.1797	17	241	660.06	202.661	3	1	5	8	0.444444	5	0	5.08746	0.975	82	C10H13NO4S	16	0.137931	58.8655	64.63	5	1	0	6	16	29	0	0	2	0	1	0
ZINC00333594	c1ccc(cc1)OCC(=O)Nn2cnnc2	218.08	160	2	0.4272	5	1	69.04	4	2	0	0.87726	1.9	30.2719	11	11	26	16.4461	17	270	489.06	180.752	4	1	4	8	0.5	4	0	5.08746	1.687	76	C10H10N4O2	16	0.0384615	56.3267	69.04	6	1	1	6	16	26	0	0	2	0	0	1
ZINC00442484	CC(C)CNC(=O)c1cc(ccc1OC)Cl	241.087	164	1	2.7344	2	1	38.33	4	1	0	0.746859	2.34	36.6727	6	6	32	21.4453	16	202	784.04	226.094	2	1	6	10	0.5	8	0	5	3.042	74	C12H16ClNO2	16	0.15625	65.1752	38.33	3	1	1	4	16	32	0	0	1	0	0	0
ZINC00453563	c1ccc(cc1)Nc2ccc(cc2N)C#N	209.095	63	3	2.88408	3	2	61.84	2	2	1	0.760398	2.56	33.5147	12	12	27	12.6853	17	253	544.03	198.79	3	2	2	16	0.5	3	0	5.08746	2.14	78	C13H11N3	16	0	65.2941	61.84	3	3	0	3	16	27	0	0	2	0	0	0
ZINC00474708	CC(=O)N1CCN(CC1)c2ccc(cc2)Cl	238.087	179	5	2.0085	2	0	23.55	1	1	0	0.876938	2.34	36.3039	6	6	31	21.7361	17	253	784.04	215.944	3	0	3	7	0.5	3	0	5.08746	2.405	80	C12H15ClN2O	16	0.16129	65.919	23.55	3	0	1	4	16	31	0	0	2	1	1	0
ZINC00475038	Cc1cnc(s1)NC(=O)CCC2CCCC2	238.114	106	3	3.36042	3	1	70.23	4	1	0	0.807935	2.34	39.0243	5	5	34	24.8957	17	267	985.04	221.879	3	1	4	8	0.5	5	0	5.08746	2.396	78	C12H18N2OS	16	0.235294	66.6727	41.99	3	1	1	4	16	34	0	0	2	1	1	1
ZINC00798104	CS(=O)(=O)N1CCC(CC1)C(=O)NC2CC2	246.104	322	1	-0.0634	3	1	74.86	3	0	0	0.754068	1.9	37.1083	0	0	34	29.7517	17	238	985.06	221.04	5	1	3	4	0.444444	4	0	5.08746	-0.094	84	C10H18N2O3S	16	0.264706	60.3055	66.48	5	1	1	6	16	34	0	0	2	2	2	0
ZINC00860450	CC(=O)Nc1cccc(c1)NC(=O)COC	222.1	27	5	1.2299	3	2	67.43	4	1	0	0.876587	2.12	33.3011	6	6	30	20.4569	16	238	660.05	210.738	5	2	5	12	0.5	6	0	5	0.012	72	C11H14N2O3	16	0.1	61.2514	67.43	5	2	2	5	16	30	0	0	1	0	0	0
ZINC01056639	COC(=O)Nc1nnc(s1)CC2CCCC2	241.088	299	4	2.4491	5	1	92.35	3	1	0	0.86124	1.9	35.4059	5	5	31	23.5321	17	259	784.06	207.074	5	1	4	9	0.5	5	0	5.08746	3.085	78	C10H15N3O2S	16	0.225806	61.5987	64.11	5	1	1	6	16	31	0	0	2	1	1	1
ZINC00371753	CCc1ccc(cc1)NC(=O)c2cnccn2	227.106	22	4	2.2913	3	1	54.88	3	2	0	0.880206	2.45	35.6503	12	12	30	18.4697	18	299	689.04	210.217	4	1	3	15	0.454545	4	0	5.16993	1.479	82	C13H13N3O	17	0.0666667	65.8052	54.88	4	1	1	4	17	30	0	0	2	0	0	1
ZINC00373530	CCc1c(c(on1)C)C(=O)Nc2cc(on2)C	235.096	115	3	2.09414	5	1	81.16	3	2	0	0.847822	2.01	33.7343	10	10	30	19.6617	18	251	689.06	198.478	2	1	3	13	0.444444	6	0	5.16993	1.586	86	C11H13N3O3	17	0.133333	59.8112	81.16	6	1	1	6	17	30	0	0	2	0	0	2
ZINC00442231	c1cc(ccc1C(=O)N)NC(=O)C2CCCC2	232.121	31	3	1.9142	2	2	72.19	3	1	0	0.870976	2.45	37.3527	6	6	33	19.4073	18	279	884.04	224.183	4	2	3	12	0.5	3	0	5.16993	1.507	84	C13H16N2O2	17	0.151515	65.5476	72.19	4	3	2	4	17	33	0	0	2	1	1	0
ZINC01056494	Cc1ccc(s1)C(=O)Nc2ccccc2OC	247.067	46	1	3.31742	3	1	66.57	3	2	0	0.880271	2.45	37.1523	11	11	30	20.0257	18	254	689.04	218.159	2	1	3	15	0.444444	5	0	5.16993	1.821	84	C13H13NO2S	17	0.0666667	70.0032	38.33	3	1	1	4	17	30	0	0	2	0	0	1
ZINC00032414	CC(=O)c1cccc(c1)NC(=O)N2CCOCC2	248.116	43	7	1.7533	3	1	58.64	2	1	0	0.811805	2.34	38.1547	6	6	34	23.9633	19	295	919.05	232.973	5	1	3	12	0.5	3	0	5.24793	0.535	88	C13H16N2O3	18	0.147059	67.8572	58.64	5	1	2	5	18	34	0	0	2	1	1	0
ZINC00218564	c1cc(ccc1N2CCN(CC2)C(=O)C3CC3)F	248.132	179	5	1.8843	2	0	23.55	2	1	0	0.793584	2.56	39.5345	6	6	35	24.7055	20	335	1063.04	229.036	3	0	2	7	0.454545	3	0	5.32193	2.15	96	C14H17FN2O	18	0.2	67.917	23.55	3	0	1	4	18	35	0	0	3	2	2	0
ZINC00241544	C[C@H](C(=O)[O-])Oc1ccc(cc1)c2ccccc2	241.086	131	5	1.8708	3	0	49.36	4	2	0	0.869685	2.78	37.4743	12	12	31	18.0437	19	317	718.03	228.081	2	0	4	13	0.454545	6	0	5.24793	3.304	88	C15H13O3	18	0.0645161	66.975	49.36	3	0	0	3	18	31	1	0	2	0	0	0
ZINC00246853	c1ccc2c(c1)[nH]c(n2)NC(=O)C3CCCCC3	243.137	49	5	3.0817	2	2	57.78	2	2	0	0.872788	2.56	40.0775	9	10	35	22.1825	20	314	1063.04	220.429	3	2	3	12	0.5	2	0	5.32193	3.405	94	C14H17N3O	18	0.171429	71.2984	57.78	4	2	1	4	18	35	0	0	3	1	1	1
ZINC00476743	CC(C)c1ccc(cc1)C(=O)Nc2ccccn2	240.126	255	2	3.4573	2	1	41.99	3	2	0	0.90077	2.78	40.0707	12	12	34	20.4293	19	318	919.03	233.812	3	1	3	15	0.454545	5	0	5.24793	3.874	88	C15H16N2O	18	0.0882353	72.7212	41.99	3	1	1	3	18	34	0	0	2	0	0	1
ZINC00612200	COC(=O)c1ccccc1NC(=O)N2CCCC2	248.116	43	7	2.1009	3	1	58.64	2	1	0	0.794697	2.34	38.1547	6	6	34	23.9633	19	267	919.05	232.973	5	1	4	13	0.444444	4	0	5.24793	1.929	88	C13H16N2O3	18	0.147059	67.6072	58.64	5	1	2	5	18	34	0	0	2	1	1	0
ZINC00859193	CN(CCc1ccccn1)C(=O)c2ccccc2	240.126	259	1	2.3963	2	0	33.2	4	2	0	0.905373	2.78	40.0707	12	12	34	21.7493	19	324	919.03	233.812	3	0	5	9	0.454545	5	0	5.24793	2.274	86	C15H16N2O	18	0.0882353	71.3435	33.2	3	0	1	3	18	34	0	0	2	0	0	1
ZINC01056146	Cc1c(cco1)C(=O)Nc2cc(on2)C(C)(C)C	248.116	115	3	3.12582	4	1	68.27	2	2	0	0.810973	2.34	38.1547	10	10	34	22.9413	19	274	919.05	222.073	2	1	3	13	0.444444	7	0	5.24793	1.864	94	C13H16N2O3	18	0.147059	66.6012	68.27	5	1	1	5	18	34	0	0	2	0	0	2
ZINC01471450	c1ccc(cc1)CC2CCN(CC2)C(=O)CC#N	242.142	185	6	2.38138	2	0	44.1	3	1	0	0.777419	2.78	41.4043	6	6	36	23.2757	19	339	1063.03	247.348	3	0	5	6	0.5	3	0	5.24793	1.981	86	C15H18N2O	18	0.194444	69.68	44.1	3	0	1	3	18	36	0	0	2	1	1	0
ZINC00466600	c1ccc(cc1)c2ccc(cc2)NC(=O)N	212.095	55	2	2.8442	1	2	55.12	2	2	0	0.802659	2.56	33.8835	12	12	28	14.0765	17	255	601.03	199.22	3	2	3	16	0.5	2	0	5.08746	2.338	78	C13H12N2O	16	0	65.0841	55.12	3	3	2	3	16	28	0	0	2	0	0	0
ZINC00393736	COc1cc(ccc1N)N2CCOCC2	208.121	178	4	1.114	4	1	47.72	2	1	1	0.663762	2.23	33.8327	6	6	31	22.6433	16	196	814.04	194.864	3	1	2	9	0.5	4	0	5	1.049	74	C11H16N2O2	15	0.16129	60.4384	47.72	4	2	0	4	15	31	0	0	2	1	1	0
ZINC00152375	CC(C)(C)OC(=O)N1CC[NH+](CC1)CCO	231.171	383	2	-0.8857	3	2	54.21	2	0	0	0.718406	2.12	39.3022	0	0	39	31.3178	16	238	1281.05	233.502	4	2	5	4	0.5	8	0	5	0.098	76	C11H23N2O3	16	0.25641	60.4565	54.21	5	2	1	5	16	39	0	0	1	1	1	0
ZINC00153479	c1ccc(c(c1)C[NH3+])N2CCC(CC2)CO	221.165	184	1	0.6372	2	2	51.11	3	1	0	0.813725	2.56	39.8847	6	6	37	23.6173	17	233	1204.03	221.984	2	2	2	7	0.444444	5	0	5.08746	2.036	78	C13H21N2O	16	0.189189	65.0569	51.11	3	4	0	3	16	37	0	0	2	1	1	0
ZINC01402339	c1cc(ccc1c2ccn[nH]2)n3ccnc3	210.091	8	2	2.2624	3	1	46.5	2	3	0	0.731698	2.34	32.1879	16	16	26	14.8921	18	254	544.04	171.871	2	1	0	16	0.444444	2	0	5.16993	2.555	84	C12H10N4	16	0	61.1457	46.5	4	1	0	4	16	26	0	0	3	0	0	2
ZINC00168493	COC(=O)c1ccc(cc1)c2ccc(cc2)N	227.095	67	4	2.7224	3	1	52.32	2	2	1	0.756011	2.67	36.0123	12	12	30	16.4257	18	292	689.03	214.309	3	1	4	16	0.454545	5	0	5.16993	3.081	84	C14H13NO2	17	0.0333333	67.6299	52.32	3	2	0	3	17	30	0	0	2	0	0	0
ZINC00168836	c1ccc2c(c1)ncn2c3ccc(cc3)CO	224.095	173	1	2.5178	3	1	38.05	2	3	0	0.748134	2.67	35.6435	15	16	29	16.4185	19	284	689.03	193.259	2	1	2	15	0.5	3	0	5.24793	2.376	90	C14H12N2O	17	0.0344828	66.9928	38.05	3	1	0	3	17	29	0	0	3	0	0	1
ZINC00170375	c1ccc2c(c1)nc(o2)c3cc(ccc3F)N	228.07	169	1	3.2161	3	1	52.05	1	3	1	0.718165	2.45	32.4401	15	16	26	13.6179	19	239	512.04	182.031	2	1	0	16	0.5	3	0	5.24793	2.504	92	C13H9FN2O	17	0	63.8154	52.05	3	2	0	4	17	26	0	0	3	0	0	1
ZINC00168899	COC(=O)c1ccccc1Oc2ccc(cc2)N	243.09	67	4	2.8477	4	1	61.55	3	2	1	0.834533	2.56	36.8143	12	12	31	18.3417	19	289	718.04	223.1	3	1	4	17	0.5	6	0	5.24793	2.622	88	C14H13NO3	18	0.0322581	68.7099	61.55	4	2	0	4	18	31	0	0	2	0	0	0
ZINC00170266	c1cnc(nc1)Oc2ccc(cc2)c3cc[nH]n3	238.085	156	2	2.659	4	1	63.69	3	3	0	0.649019	2.34	34.7499	17	17	28	16.1481	20	341	594.05	195.32	3	1	0	18	0.454545	3	0	5.32193	2.566	92	C13H10N4O	18	0	66.1297	63.69	5	1	0	5	18	28	0	0	3	0	0	2
ZINC01396133	COc1ccc(cc1)[C@H]2C=C(NC(=O)N2)C(=O)[O-]	247.072	154	1	-0.3171	4	2	90.49	3	1	0	0.6029	2.12	33.8627	6	6	29	18.1353	19	287	594.06	220.513	5	2	3	9	0.5	5	0	5.24793	0.215	90	C12H11N2O4	18	0.0689655	60.4924	90.49	6	2	2	6	18	29	1	0	2	0	1	0
ZINC01396467	C[NH+]1CCN(CC1)S(=O)(=O)N(C)C	208.112	225	1	-2.3769	2	1	53.44	2	0	0	0.551041	1.57	32.1263	0	0	31	31.4337	13	137	805.06	187.67	4	1	4	5	0.428571	5	0	4.70044	-1.292	64	C7H18N3O2S	13	0.225806	50.8005	45.06	5	1	0	6	13	31	0	0	1	1	1	0
ZINC01405692	COC(=O)C1CC[NH+](CC1)CC(=O)N	201.124	319	2	-2.0604	3	2	73.83	3	0	0	0.774122	1.9	31.7815	0	0	31	23.0765	14	186	779.05	196.273	4	2	4	3	0.444444	5	0	4.80735	-1.205	64	C9H17N2O3	14	0.225806	49.4981	73.83	5	3	1	5	14	31	0	0	1	1	1	0
ZINC00002105	c1ccnc(c1)NS(=O)(=O)c2ccc(cc2)N	249.057	142	2	1.4646	4	2	93.46	3	2	1	0.653656	2.01	34.4987	12	12	28	19.8213	18	268	569.06	205.56	5	2	3	17	0.5	4	0	5.16993	1.374	86	C11H11N3O2S	17	0	65.8999	85.08	5	3	0	6	17	28	0	0	2	0	0	1
ZINC00298393	CCOc1ccc2c(c1)sc(n2)C	193.056	168	2	3.00342	3	0	50.36	2	2	0	0.777987	2.23	29.7367	9	10	24	17.5413	14	165	469.03	162.754	1	0	3	10	0.5	4	0	4.80735	2.128	66	C10H11NOS	13	0.125	55.526	22.12	2	0	0	3	13	24	0	0	2	0	0	1
ZINC00094695	Cn1c(cc(n1)c2cccs2)N	179.052	338	1	1.7308	4	1	72.08	1	2	0	0.6764	1.9	26.2811	10	10	21	13.4389	13	123	352.04	141.365	2	1	0	11	0.5	3	0	4.70044	1.192	62	C8H9N3S	12	0.047619	50.9334	43.84	3	2	0	4	12	21	0	0	2	0	0	2
ZINC00069531	CCc1ccccc1NNC(=S)N	195.083	54	5	1.4091	2	3	82.17	3	1	2	0.563255	2.01	30.7083	6	6	26	14.6917	13	144	520.04	181.917	3	3	4	11	0.428571	6	0	4.70044	2.4	58	C9H13N3S	13	0.0769231	59.3638	50.08	3	4	0	4	13	26	0	0	1	0	0	0
ZINC00158702	c1cc(sc1)c2ccc(cc2)C[NH3+]	190.069	239	1	2.157	1	1	55.88	2	2	0	0.750446	2.45	31.3615	11	11	25	14.0785	14	169	520.02	169.941	0	1	2	11	0.5	3	0	4.80735	2.68	64	C11H12NS	13	0.04	56.3471	27.64	1	3	0	2	13	25	0	0	2	0	0	1
ZINC00139331	CNC(=O)NCc1c(cccc1Cl)F	216.047	101	1	1.9081	1	2	41.13	2	1	0	0.75987	1.9	28.2469	6	6	24	14.8331	14	174	394.05	182.48	3	2	5	6	0.5	5	0	4.80735	1.843	64	C9H10ClFN2O	14	0.0833333	52.7054	41.13	3	2	2	5	14	24	0	0	1	0	0	0
ZINC00140092	c1cn[nH]c1c2cc(cc(c2O)F)F	196.045	9	1	2.0605	2	2	48.91	1	2	0	0.777612	1.9	23.9568	11	11	20	9.62524	15	144	259.05	147.444	1	2	0	12	0.5	4	0	4.90689	2.661	72	C9H6F2N2O	14	0	45.6045	48.91	3	2	0	5	14	20	0	0	2	0	0	1
ZINC00144519	CCc1nc(no1)c2ccc(cc2)Cl	208.04	6	3	2.9524	3	0	38.92	2	2	0	0.846619	2.12	28.7831	11	11	23	13.4949	15	199	394.04	167.816	1	0	2	11	0.444444	4	0	4.90689	3.262	70	C10H9ClN2O	14	0.0869565	54.122	38.92	3	0	0	4	14	23	0	0	2	0	0	1
ZINC00166528	CC(C)c1nnc(s1)NCC(C)(C)C	213.13	298	1	3.1195	4	1	66.05	3	1	0	0.712049	2.12	36.4691	5	5	33	25.0309	14	173	907.04	204.486	3	1	4	6	0.5	9	0	4.80735	3.197	68	C10H19N3S	14	0.242424	61.9427	37.81	3	1	0	4	14	33	0	0	1	0	0	1
ZINC00040120	COc1ccc(cc1)C(=O)NCC(=O)N	208.085	133	4	-0.0897	3	2	81.42	4	1	0	0.809432	2.01	30.2075	6	6	27	16.9505	15	221	519.05	193.442	4	2	6	10	0.5	5	0	4.90689	-0.004	68	C10H12N2O3	15	0.0740741	54.5216	81.42	5	3	2	5	15	27	0	0	1	0	0	0
ZINC00116168	COC(=O)c1c(cc(s1)c2cccs2)N	239.007	337	1	2.8454	5	1	108.8	2	2	0	0.74807	2.01	32.1051	10	10	24	16.6129	16	194	415.05	187.416	3	1	4	14	0.5	5	0	5	1.584	76	C10H9NO2S2	15	0.0416667	63.3839	52.32	3	2	0	5	15	24	0	0	2	0	0	2
ZINC00117896	c1cnc(cn1)c2ncc(c(n2)N)C#N	198.065	272	1	0.38748	6	1	101.37	1	2	0	0.688592	1.79	26.4408	12	12	21	11.8392	16	214	274.06	162.596	6	1	2	15	0.444444	2	0	5	-1.023	74	C9H6N6	15	0	52.1854	101.37	6	2	0	6	15	21	0	0	2	0	0	2
ZINC00141615	CC(C)NC(=O)N[C@@H]1CCCCNC1=O	213.148	305	1	0.3627	2	3	70.23	2	0	0	0.760222	2.01	35.1731	0	0	34	24.6669	15	190	946.05	214.458	5	3	5	4	0.5	4	0	4.90689	0.801	68	C10H19N3O2	15	0.235294	57.4521	70.23	5	3	3	5	15	34	1	0	1	1	1	0
ZINC00143593	COC(=O)c1cccc(c1)NS(=O)(=O)C	229.041	131	5	0.8447	4	1	80.85	3	1	0	0.812217	1.79	30.3827	6	6	26	22.0353	15	183	466.06	195.085	5	1	4	13	0.5	6	0	4.90689	1.198	72	C9H11NO4S	15	0.0769231	56.248	72.47	5	1	0	6	15	26	0	0	1	0	0	0
ZINC01026192	c1csc(c1NC(=O)C(F)(F)F)C(=O)N	238.002	350	2	1.3478	3	2	100.43	2	1	0	0.838899	1.35	24.029	5	5	20	13.271	15	167	190.08	172.112	4	2	4	11	0.428571	6	0	4.90689	0.678	74	C7H5F3N2O2S	15	0.05	47.5216	72.19	4	3	2	8	15	20	0	0	1	0	0	1
ZINC01039495	c1cc(sc1)c2ccc(s2)c3ccn[nH]3	232.013	336	1	3.8667	3	1	85.16	2	3	0	0.710133	2.23	32.6943	15	15	23	13.9657	17	214	415.04	172.236	1	1	0	15	0.5	2	0	5.08746	2.434	80	C11H8N2S2	15	0	65.2137	28.68	2	1	0	4	15	23	0	0	3	0	0	3
ZINC00078068	COC(=O)NNc1cc(ccn1)C(F)(F)F	235.057	251	1	1.7833	4	2	63.25	2	1	1	0.759844	1.46	25.9893	6	6	24	16.5487	16	225	336.08	181.895	5	2	5	11	0.444444	8	0	5	2.224	76	C8H8F3N3O2	16	0.0833333	48.4024	63.25	5	2	1	8	16	24	0	0	1	0	0	1
ZINC00111763	COc1cccc(c1)c2nc(c(o2)N)C#N	215.069	3	1	1.80408	5	1	85.07	2	2	0	0.82599	2.12	30.2651	11	11	25	14.9909	17	229	436.05	184.415	3	1	2	15	0.444444	4	0	5.08746	1.442	80	C11H9N3O2	16	0.04	57.6184	85.07	5	2	0	5	16	25	0	0	2	0	0	1
ZINC00112962	c1cc(cc(c1)Cl)N2CC[NH+](CC2)CC#N	236.095	180	2	0.56848	2	1	31.47	2	1	1	0.744778	2.34	36.6019	6	6	31	20.7781	17	255	784.04	216.833	2	1	3	7	0.5	3	0	5.08746	1.95	78	C12H15ClN3	16	0.16129	64.8417	31.47	3	1	0	4	16	31	0	0	2	1	1	0
ZINC00113424	Cc1c(c(c([nH]1)C)C(=O)OC)c2cc[nH]n2	219.101	293	1	1.80824	3	2	70.77	2	2	0	0.778506	2.12	32.9323	10	10	29	18.4057	17	183	660.05	189.688	3	2	4	13	0.428571	6	0	5.08746	2.12	82	C11H13N3O2	16	0.103448	59.1879	70.77	5	2	0	5	16	29	0	0	2	0	0	2
ZINC00142116	CC(=O)c1ccc(o1)c2ccc(cc2F)F	222.049	109	3	3.4274	2	0	30.21	2	2	0	0.799675	2.34	29.1723	11	11	24	14.0257	17	229	385.04	183.492	1	0	3	13	0.444444	5	0	5.08746	2.874	82	C12H8F2O2	16	0.0416667	54.0645	30.21	2	0	0	4	16	24	0	0	2	0	0	1
ZINC00171546	c1cc(sc1)c2nc(no2)N3CCCCC3	235.078	331	1	2.7884	5	0	70.4	2	2	0	0.876889	2.12	35.0303	10	10	29	21.7077	18	250	721.05	189.687	2	0	0	11	0.444444	2	0	5.16993	2.578	84	C11H13N3OS	16	0.172414	63.675	42.16	4	0	0	5	16	29	0	0	3	1	1	2
ZINC00075632	Cc1cc(nn1c2ccccc2)NC(=O)OC	231.101	114	1	2.35902	4	1	56.15	2	2	0	0.855541	2.23	34.6923	11	11	30	19.7257	18	267	689.05	204.347	4	1	4	15	0.5	5	0	5.16993	2.149	84	C12H13N3O2	17	0.0666667	64.3287	56.15	5	1	1	5	17	30	0	0	2	0	0	1
ZINC00076220	c1ccc(cc1)COc2ccc(cc2)C(=O)N	227.095	138	8	2.3645	2	1	52.32	4	2	0	0.806788	2.67	36.0123	12	12	30	16.4257	18	305	689.03	214.309	2	1	3	10	0.454545	4	0	5.16993	2.534	82	C14H13NO2	17	0.0333333	65.7339	52.32	3	2	1	3	17	30	0	0	2	0	0	0
ZINC00110340	COc1ccc2cc(ccc2c1)c3cc[nH]n3	224.095	157	3	3.2385	2	1	37.91	2	3	0	0.766093	2.67	35.6435	15	16	29	15.6945	19	280	689.03	193.259	1	1	2	16	0.5	3	0	5.24793	3.831	90	C14H12N2O	17	0.0344828	68.0817	37.91	3	1	0	3	17	29	0	0	3	0	0	1
ZINC00110577	Cn1c(c(c(n1)C(F)(F)F)c2ccccc2)N	241.083	1	1	2.6881	3	1	43.84	1	2	0	0.787164	2.01	30.9989	11	11	27	15.8611	18	200	512.06	190.31	2	1	3	12	0.428571	7	0	5.16993	3.01	90	C11H10F3N3	17	0.0740741	58.0584	43.84	3	2	0	6	17	27	0	0	2	0	0	1
ZINC00112775	COc1ccccc1N2CC[NH+](CC2)CC#N	232.145	180	2	-0.07632	3	1	40.7	3	1	1	0.742322	2.45	38.9843	6	6	35	25.5537	18	272	1024.04	227.708	2	1	3	8	0.5	4	0	5.16993	1.243	82	C13H18N3O	17	0.171429	66.3837	40.7	4	1	0	4	17	35	0	0	2	1	1	0
ZINC00123457	Cc1cc(no1)c2nc(on2)c3ccccc3	227.069	4	1	2.70002	5	0	64.95	2	3	0	0.726752	2.23	32.0251	16	16	26	14.9909	19	287	512.05	178.454	1	0	0	16	0.5	3	0	5.24793	2.98	90	C12H9N3O2	17	0.0384615	59.968	64.95	5	0	0	5	17	26	0	0	3	0	0	2
ZINC00151474	Cc1cc(no1)C(=O)NNc2ccccc2F	235.076	53	3	1.87902	4	2	67.16	3	2	1	0.79636	2.01	31.4889	11	11	27	15.0091	18	281	512.06	193.119	3	2	4	15	0.5	5	0	5.16993	2.406	84	C11H10FN3O2	17	0.037037	58.7289	67.16	5	2	1	6	17	27	0	0	2	0	0	1
ZINC00157641	c1cc2c(cc1NC(=O)NCC3CC3)CCO2	232.121	19	1	2.153	2	2	50.36	3	1	0	0.842244	2.45	37.3527	6	6	33	21.6853	19	303	953.04	214.463	3	2	4	11	0.5	3	0	5.24793	1.415	90	C13H16N2O2	17	0.181818	65.3864	50.36	4	2	2	4	17	33	0	0	3	1	2	0
ZINC00157953	COc1ccc(cn1)NC(=O)Nc2cccs2	249.057	48	1	2.7957	4	2	91.49	3	2	0	0.84775	2.01	34.4987	11	11	28	19.8193	18	304	569.06	205.56	4	2	3	16	0.454545	4	0	5.16993	1.302	82	C11H11N3O2S	17	0.0357143	67.7494	63.25	5	2	2	6	17	28	0	0	2	0	0	2
ZINC00096471	Cc1nccc(n1)c2cccc(c2)NC(=O)NC	242.117	18	1	2.20332	3	2	66.91	2	2	0	0.861021	2.34	37.4171	12	12	32	20.2229	19	289	783.05	221.213	5	2	4	16	0.5	4	0	5.24793	0.967	88	C13H14N4O	18	0.0625	70.2834	66.91	5	2	2	5	18	32	0	0	2	0	0	1
ZINC00158077	c1cc(ccc1CNC(=O)N2CCOCC2)C#N	245.116	88	2	1.10008	3	1	65.36	2	1	0	0.807905	2.34	37.7859	6	6	33	22.5721	19	347	850.05	232.543	5	1	4	8	0.5	2	0	5.24793	0.525	86	C13H15N3O2	18	0.151515	65.7847	65.36	5	1	2	5	18	33	0	0	2	1	1	0
ZINC00170692	c1c(cncc1C(=O)[O-])C#CCC2CCCCC2	242.118	248	1	1.767	3	0	53.02	2	1	1	0.739864	2.78	39.7727	6	6	34	20.7273	19	330	919.03	243.824	3	0	3	11	0.454545	3	0	5.24793	3.909	86	C15H16NO2	18	0.205882	66.6375	53.02	3	0	0	3	18	34	0	0	2	1	1	1
ZINC00185941	c1ccc(cc1)[C@@H](CNC(=O)c2ccccc2)O	241.11	80	2	2.15	2	2	49.33	4	2	0	0.754594	2.78	39.1059	12	12	33	18.0161	19	326	850.03	231.605	3	2	6	9	0.454545	5	0	5.24793	2.531	86	C15H15NO2	18	0.0606061	70.177	49.33	3	2	1	3	18	33	1	0	2	0	0	0
ZINC00170709	c1ccc(cc1)C#Cc2ccc(cc2)c3ccn[nH]3	244.1	8	2	3.4765	1	1	28.68	1	3	1	0.508781	3.11	40.1215	17	17	31	13.7785	21	392	747.02	228.448	1	1	2	19	0.5	1	1	5.39232	5.345	96	C17H12N2	19	0	76.4457	28.68	2	1	0	2	19	31	0	0	3	0	0	1
ZINC00165539	CC(=O)N1CCC(CC1)C#N	152.095	320	3	0.76848	2	0	44.1	0	0	0	0.692179	2.01	25.0835	0	0	23	16.7165	11	113	419.03	157.442	3	0	3	3	0.428571	1	0	4.45943	-0.121	50	C8H12N2O	11	0.26087	40.591	44.1	3	0	1	3	11	23	0	0	1	1	1	0
ZINC00161983	C[NH2+]Cc1ccc(cc1)C(F)(F)F	190.084	241	1	1.3986	0	1	16.61	2	1	0	0.681459	2.01	25.9457	6	6	24	15.6343	13	155	420.04	163.572	0	1	3	6	0.5	7	0	4.70044	2.571	62	C9H11F3N	13	0.125	42.9974	16.61	1	2	0	4	13	24	0	0	1	0	0	0
ZINC00084002	c1ccc(cc1)CONC(=O)N	166.074	201	2	0.7865	2	2	64.35	3	1	1	0.703237	1.9	24.5519	6	6	22	12.4861	12	150	352.04	152.696	2	2	5	6	0.5	3	0	4.58496	0.699	52	C8H10N2O2	12	0.0454545	43.9501	64.35	4	3	2	4	12	22	0	0	1	0	0	0
ZINC00245038	c1ccc(cc1)Nc2nncs2	177.036	11	6	2.2817	4	1	66.05	2	2	0	0.754686	1.9	24.9476	11	11	19	11.9124	13	145	268.04	138.728	3	1	0	12	0.428571	2	0	4.70044	2.893	58	C8H7N3S	12	0	49.6337	37.81	3	1	0	4	12	19	0	0	2	0	0	1
ZINC00202968	c1ccc(c(c1)N)Nc2ccccn2	185.095	265	1	2.4074	3	2	50.94	2	2	1	0.726683	2.34	29.9947	12	12	25	13.3453	15	187	494.03	169.471	3	2	0	14	0.5	3	0	4.90689	1.893	68	C11H11N3	14	0	58.3741	50.94	3	3	0	3	14	25	0	0	2	0	0	1
ZINC00152083	C1C[C@@H](OC1)CNC(=O)N2CCOCC2	214.132	313	3	0.2072	3	1	50.8	2	0	0	0.720017	2.01	34.2083	0	0	33	27.1077	16	228	946.05	202.531	5	1	4	4	0.444444	2	0	5	-0.555	72	C10H18N2O3	15	0.272727	54.7647	50.8	5	1	2	5	15	33	1	0	2	2	2	0
ZINC01281344	c1cc(cc(c1)F)Nc2[nH]c(=O)ccn2	205.065	10	9	1.6526	3	2	57.78	2	2	0	0.839149	2.01	27.5933	12	12	23	13.5467	16	204	366.05	177.933	2	2	0	14	0.5	3	0	5	1.876	74	C10H8FN3O	15	0	54.5404	57.78	4	2	0	5	15	23	0	0	2	0	0	1
ZINC00091379	c1cc(ccc1c2ccc(o2)C(=O)NN)Cl	236.035	109	3	2.2035	3	2	68.26	2	2	3	0.404502	2.12	31.3451	11	11	25	11.8129	17	250	436.05	191.266	3	2	4	15	0.5	4	0	5.08746	1.704	80	C11H9ClN2O2	16	0	60.8076	68.26	4	3	1	5	16	25	0	0	2	0	0	1
ZINC00114402	Cc1c(nc(=O)[nH]n1)Nc2cccc(c2)O	218.08	37	5	0.92252	5	3	90.9	2	2	0	0.902394	1.9	30.2719	12	12	26	14.5301	17	217	489.06	191.652	3	3	0	15	0.5	4	0	5.08746	1.365	80	C10H10N4O2	16	0.0384615	58.7792	90.9	6	3	0	6	16	26	0	0	2	0	0	1
ZINC00387469	CS(=O)(=O)Nc1ccc(cc1)c2ccccc2	247.067	131	5	2.7251	2	1	54.55	3	2	0	0.893331	2.45	37.1523	12	12	30	21.3477	18	274	689.04	218.159	3	1	3	16	0.5	4	0	5.16993	3.202	86	C13H13NO2S	17	0.0333333	70.3445	46.17	3	1	0	4	17	30	0	0	2	0	0	0
ZINC00115413	CCCc1nnc(s1)NC(=O)c2ccccn2	248.073	296	2	2.1379	5	1	96.01	4	2	0	0.851167	2.01	35.4635	11	11	29	19.6565	18	298	628.06	207.767	5	1	3	14	0.454545	5	0	5.16993	2.162	82	C11H12N4OS	17	0.103448	66.0942	67.77	5	1	1	6	17	29	0	0	2	0	0	2
ZINC00060674	CC[C@H](C)NC(=O)c1ccc(cc1)NC(=O)C	234.137	76	3	2.1733	2	2	58.2	4	1	0	0.85552	2.45	38.6863	6	6	35	22.9137	17	277	953.04	236.539	4	2	6	12	0.454545	7	0	5.08746	1.922	78	C13H18N2O2	17	0.142857	67.9649	58.2	4	2	2	4	17	35	1	0	1	0	0	0
ZINC00041395	c1ccc(cc1)CONC(=O)Nc2ccccc2	242.106	201	2	2.9399	2	2	50.36	4	2	1	0.812681	2.56	37.7791	12	12	32	18.1789	19	357	783.04	225.306	2	2	5	11	0.5	4	0	5.24793	2.783	84	C14H14N2O2	18	0.03125	69.8274	50.36	4	2	2	4	18	32	0	0	2	0	0	0
ZINC00114358	Cc1c(nc(=O)[nH]n1)Nc2ccccc2C(C)C	244.132	37	5	2.34032	4	2	70.67	3	2	0	0.86875	2.34	38.7507	12	12	34	21.0893	19	245	919.05	234.75	3	2	3	14	0.5	6	0	5.24793	2.965	90	C13H16N4O	18	0.117647	71.2034	70.67	5	2	0	5	18	34	0	0	2	0	0	1
ZINC00114363	Cc1c(nc(=O)[nH]n1)Nc2ccc(cc2)C(C)C	244.132	37	5	2.34032	4	2	70.67	3	2	0	0.85177	2.34	38.7507	12	12	34	21.0893	19	295	919.05	234.75	3	2	3	14	0.5	6	0	5.24793	3.176	90	C13H16N4O	18	0.117647	71.2034	70.67	5	2	0	5	18	34	0	0	2	0	0	1
ZINC00067722	COc1ccc(cc1)NC(=O)Nc2ccncc2	243.101	143	5	2.7342	3	2	63.25	3	2	0	0.812884	2.34	36.4523	12	12	31	19.7257	19	345	718.05	219.007	4	2	3	17	0.5	4	0	5.24793	1.145	86	C13H13N3O2	18	0.0322581	69.8724	63.25	5	2	2	5	18	31	0	0	2	0	0	1
ZINC00970783	c1cc(oc1)C(=O)N2CCN(CC2)C(=O)C3CC3	248.116	333	4	0.974	3	0	53.76	2	1	0	0.736127	2.34	38.1547	5	5	34	25.2833	20	312	990.05	223.253	4	0	2	8	0.5	2	0	5.32193	-0.093	96	C13H16N2O3	18	0.205882	63.9155	53.76	5	0	2	5	18	34	0	0	3	2	2	1
ZINC00201092	CC(C)(C)C(=O)NCCc1[nH]c2ccccc2n1	245.153	50	5	2.2677	2	2	57.78	3	2	0	0.672273	2.56	41.4111	9	10	37	24.3689	19	305	1138.04	232.786	3	2	6	9	0.5	7	0	5.24793	1.63	92	C14H19N3O	18	0.162162	72.2624	57.78	4	2	1	4	18	37	0	0	2	0	0	1
ZINC00039661	Cc1nc2ccc(cc2o1)O	149.048	168	2	1.84182	3	1	46.26	0	2	0	0.858453	2.01	21.4516	9	10	18	10.8884	12	107	251.03	118.443	1	1	0	10	0.5	2	0	4.58496	1.037	58	C8H7NO2	11	0.0555556	40.4108	46.26	3	1	0	3	11	18	0	0	2	0	0	1
ZINC00373253	Cc1ccc(cc1C)c2c(sc(n2)N)C	218.088	107	5	3.31756	3	1	67.15	1	2	0	0.841456	2.45	35.5551	11	11	29	18.2449	16	193	690.03	196.916	2	1	0	12	0.5	5	0	5	2.766	78	C12H14N2S	15	0.103448	66.1734	38.91	2	2	0	3	15	29	0	0	2	0	0	1
ZINC00088691	COc1ccc(cc1)N2C[C@@H](CC2=O)C(=O)N	234.1	152	2	0.5334	3	1	72.63	3	1	0	0.693686	2.23	35.0611	6	6	31	20.4569	18	267	752.05	215.677	4	1	3	10	0.5	4	0	5.16993	-0.365	86	C12H14N2O3	17	0.129032	62.6484	72.63	5	2	2	5	17	31	1	0	2	1	1	0
ZINC00139185	c1cc(ccc1C(=O)[O-])Nc2cn[nH]c(=O)n2	231.052	37	5	-0.728	6	2	110.8	3	2	0	0.775921	1.79	29.0736	12	12	24	13.1664	18	278	353.07	196.488	5	2	3	17	0.5	4	0	5.16993	0.59	84	C10H7N4O3	17	0	56.7079	110.8	7	2	0	7	17	24	0	0	2	0	0	1
ZINC00238864	c1ccc2c(c1)CC[NH+](C2)Cc3ccc(cc3)O	240.139	206	2	1.5334	1	2	24.67	2	2	0	0.707183	3	42.0643	12	12	36	20.9977	20	335	1138.02	231.709	0	2	0	7	0.454545	3	0	5.32193	2.764	94	C16H18NO	18	0.111111	71.4905	24.67	2	2	0	2	18	36	1	1	3	0	1	0
ZINC01502377	c1ccnc(c1)c2c[nH]nc2	145.064	258	1	1.4717	2	1	41.57	1	2	0	0.656675	2.01	22.0476	11	11	18	9.63245	12	113	251.03	120.219	2	1	0	11	0.5	1	0	4.58496	1.487	54	C8H7N3	11	0	41.8187	41.57	3	1	0	3	11	18	0	0	2	0	0	2
ZINC01529114	CC(=O)N1CCC(CC1)[NH2+]CCOC	201.16	371	3	-0.7929	2	1	46.15	4	0	1	0.649925	2.12	35.4067	0	0	35	27.8113	14	208	1043.04	207.416	3	1	5	3	0.5	6	0	4.80735	-0.069	62	C10H21N2O2	14	0.257143	53.9444	46.15	4	2	1	4	14	35	0	0	1	1	1	0
ZINC00167051	CNc1ccccc1C(F)(F)F	175.061	72	1	2.7471	1	1	12.03	1	1	0	0.686033	1.9	22.1853	6	6	20	13.0147	12	98	268.04	144.958	1	1	3	7	0.4	6	0	4.58496	2.593	58	C8H8F3N	12	0.1	40.9907	12.03	1	1	0	4	12	20	0	0	1	0	0	0
ZINC00388040	CC[NH+](CC)c1cccc(c1)O	166.123	208	1	0.9484	1	2	24.67	3	1	0	0.812347	2.34	30.1707	6	6	28	18.8113	12	112	652.02	171.456	0	2	5	8	0.5	6	0	4.58496	1.91	54	C10H16NO	12	0.142857	49.8115	24.67	2	2	0	2	12	28	0	0	1	0	0	0
ZINC00120608	COc1cc(ccc1N)Nc2ccccc2	214.111	140	2	3.021	3	2	47.28	3	2	1	0.656558	2.56	35.2171	12	12	30	17.2209	17	238	721.03	201.856	2	2	2	15	0.444444	5	0	5.08746	2.332	78	C13H14N2O	16	0.0333333	67.1311	47.28	3	3	0	3	16	30	0	0	2	0	0	0
ZINC00347523	C[C@@H](Cc1ccc(cc1)O)[NH+](C)C	180.139	207	1	0.4677	1	2	24.67	3	1	0	0.695466	2.45	33.2643	6	6	31	20.9977	13	157	805.02	188.752	0	2	4	7	0.5	7	0	4.70044	1.826	60	C11H18NO	13	0.16129	54.0835	24.67	2	2	0	2	13	31	1	0	1	0	0	0
ZINC00576441	c1cc(sc1)C[NH2+]Cc2ccncc2	205.08	238	3	1.4067	2	1	57.74	4	2	0	0.804753	2.34	33.1283	11	11	27	17.8117	15	217	602.03	180.938	1	1	3	6	0.444444	4	0	4.90689	1.166	66	C11H13N2S	14	0.0740741	57.8894	29.5	2	2	0	3	14	27	0	0	2	0	0	2
ZINC00208675	c1cc(c2c(c1)c3c([nH]2)CCCC3)C#N	196.1	75	3	2.91838	1	1	39.58	0	2	0	0.809772	2.67	33.0815	9	10	27	14.4385	17	182	631.02	180.71	1	1	2	11	0.428571	0	0	5.08746	2.968	82	C13H12N2	15	0.148148	59.6557	39.58	2	1	0	2	15	27	0	0	3	0	1	1
ZINC00360580	Cc1ccccc1CNc2nnnn2C	203.117	205	1	1.13062	5	1	55.63	3	2	0	0.807509	2.01	31.7683	11	11	28	16.8517	16	207	631.05	176.805	4	1	2	6	0.5	5	0	5	2.495	74	C10H13N5	15	0.107143	57.3037	55.63	5	1	0	5	15	28	0	0	2	0	0	1
ZINC00381801	CCC(=O)Nc1ccc(cc1)S(=O)(=O)N	228.057	34	2	0.6825	3	2	97.64	3	1	0	0.78236	1.79	31.3475	6	6	27	20.5525	15	205	519.06	197.291	5	2	4	13	0.444444	5	0	4.90689	-0.012	72	C9H12N2O3S	15	0.0740741	56.7359	89.26	5	3	1	6	15	27	0	0	1	0	0	0
ZINC00382486	CN(c1ccc(cc1)C(=O)N)S(=O)(=O)C	228.057	133	4	0.1813	3	1	88.85	3	1	0	0.777765	1.79	31.3475	6	6	27	21.8725	15	183	519.06	197.291	5	1	4	13	0.5	5	0	4.90689	0.712	74	C9H12N2O3S	15	0.0740741	58.2067	80.47	5	2	1	6	15	27	0	0	1	0	0	0
ZINC00058265	CC(C)[NH+]1CCN(CC1)c2ccc(cc2)O	221.165	182	4	0.5055	2	2	27.91	2	1	0	0.853888	2.56	39.8847	6	6	37	26.2573	17	253	1204.03	221.984	1	2	3	8	0.5	5	0	5.08746	2.312	80	C13H21N2O	16	0.189189	66.1525	27.91	3	2	0	3	16	37	0	0	2	1	1	0
ZINC00150322	CC(C)C(=O)Nc1nnc(s1)[C@@H]2CCCO2	241.088	297	5	1.9841	5	1	92.35	3	1	0	0.768054	1.9	35.4059	5	5	31	23.5321	17	237	784.06	207.074	5	1	4	8	0.444444	5	0	5.08746	1.423	80	C10H15N3O2S	16	0.225806	61.3037	64.11	5	1	1	6	16	31	1	0	2	1	1	1
ZINC00481010	COc1ccc(cc1)c2c[nH]c(=O)[nH]c2=O	218.069	118	2	0.7388	3	2	74.95	2	2	0	0.83543	2.12	30.6339	12	12	26	16.0841	17	249	489.05	195.745	0	2	2	15	0.5	3	0	5.08746	1.676	80	C11H10N2O3	16	0.0384615	59.6714	74.95	5	2	0	5	16	26	0	0	2	0	0	1
ZINC00712157	CNC(=O)Nc1nc2ccc(cc2s1)OC	237.057	150	3	2.0562	4	2	91.49	2	2	0	0.882048	1.9	32.7387	9	10	27	19.8193	17	247	544.06	190.901	4	2	4	14	0.5	4	0	5.08746	0.74	80	C10H11N3O2S	16	0.0740741	64.2504	63.25	5	2	2	6	16	27	0	0	2	0	0	1
ZINC00283931	COC(=O)c1ccc(cc1)NC(=O)C(F)(F)F	247.046	67	4	1.974	3	1	55.4	2	1	0	0.788422	1.79	28.1113	6	6	25	16.8467	17	257	353.07	200.648	4	1	4	12	0.5	8	0	5.08746	1.911	82	C10H8F3NO3	17	0.08	52.4662	55.4	4	1	1	7	17	25	0	0	1	0	0	0
ZINC00339495	Cc1c(nc2c(n1)c(nc(n2)N)OC(C)C)C	233.128	274	1	1.40604	6	1	86.81	2	2	0	0.904691	2.01	35.6639	10	11	32	22.9341	18	216	817.06	202.891	5	1	3	12	0.5	7	0	5.16993	0.947	88	C11H15N5O	17	0.15625	64.7784	86.81	6	2	0	6	17	32	0	0	2	0	0	2
ZINC00358861	CCC(=O)NC(=S)N1CCCc2c1cccc2	248.098	151	3	2.2503	2	1	64.43	1	1	1	0.801238	2.45	39.4507	6	6	33	22.2293	18	247	884.04	233.902	3	1	6	12	0.444444	4	0	5.16993	2.439	84	C13H16N2OS	17	0.151515	73.1407	32.34	3	1	1	4	17	33	0	0	2	0	1	0
ZINC00481300	c1ccc(c(c1)C(=O)N)Nc2ccc(cc2)Cl	246.056	15	2	3.1825	2	2	55.12	3	2	0	0.826635	2.45	35.3967	12	12	28	13.4033	18	255	569.04	214.431	3	2	3	16	0.444444	4	0	5.16993	3.172	84	C13H11ClN2O	17	0	69.6946	55.12	3	3	1	4	17	28	0	0	2	0	0	0
ZINC00339196	c1cc(ccc1CCC(=O)[O-])c2ccc(cc2)O	241.086	62	3	1.7417	3	1	60.36	4	2	0	0.705009	2.78	37.4743	12	12	31	16.1277	19	337	718.03	228.081	2	1	4	13	0.5	6	0	5.24793	2.671	88	C15H13O3	18	0.0645161	66.8708	60.36	3	1	0	3	18	31	0	0	2	0	0	0
ZINC00333336	CC1([C@@H](SC(=S)N1C)NO)C	192.039	330	1	1.0334	4	2	92.89	1	0	2	0.426222	1.57	27.3635	0	0	23	17.8585	11	82	419.05	165.141	1	2	2	3	0.4	5	0	4.45943	1.263	56	C6H12N2OS2	11	0.217391	50.7412	35.5	3	2	0	5	11	23	1	0	1	1	1	0
ZINC00967487	c1ccc(cc1)c2ccsc2	160.035	0	1	3.4151	1	0	28.24	1	2	0	0.535004	2.45	25.8343	11	11	19	11.0257	12	113	290.01	140.33	0	0	0	11	0.5	1	0	4.58496	3.317	54	C10H8S	11	0	49.755	0	0	0	0	1	11	19	0	0	2	0	0	1
ZINC01577159	CC[NH+]1CCCCC1	114.128	376	2	0.0751	0	1	4.44	1	0	0	0.497818	2.12	24.0887	0	0	24	18.8113	8	60	520.01	129.587	0	1	2	0	0.4	2	0	4	1.191	34	C7H16N	8	0.291667	35.0887	4.44	1	1	0	1	8	24	0	0	1	1	1	0
ZINC00164674	CN(C)c1cc[nH+]cc1	123.092	280	1	0.5667	1	0	17.38	1	1	0	0.615226	2.01	21.8547	6	6	20	14.6653	9	69	328.02	121.774	1	1	3	7	0.4	3	0	4.16993	2.017	40	C7H11N2	9	0.1	37.3247	17.38	2	1	0	2	9	20	0	0	1	0	0	1
ZINC00388374	COc1ccc(cc1)Cl	142.019	163	2	2.3486	1	0	9.23	1	1	0	0.624948	2.01	19.9696	6	6	16	9.98845	9	77	184.02	122.464	0	0	2	7	0.5	3	0	4.16993	2.559	40	C7H7ClO	9	0.0625	38.004	9.23	1	0	0	2	9	16	0	0	1	0	0	0
ZINC00161986	C[NH2+]Cc1cccc(c1)Cl	156.058	240	4	1.0332	0	1	16.61	2	1	0	0.610984	2.12	24.6947	6	6	21	12.4453	10	92	351.02	143.285	0	1	3	6	0.5	4	0	4.32193	2.268	44	C8H11ClN	10	0.0952381	43.0054	16.61	1	2	0	2	10	21	0	0	1	0	0	0
ZINC00389595	Cc1cc(ccc1F)OC	140.064	163	2	2.14272	1	0	9.23	1	1	0	0.533915	2.12	21.4401	6	6	19	12.9579	10	88	271.02	130.616	0	0	2	7	0.5	4	0	4.32193	2.324	46	C8H9FO	10	0.105263	37.689	9.23	1	0	0	2	10	19	0	0	1	0	0	0
ZINC01571069	C1COCC[NH+]1CCC#N	141.103	382	1	-1.18482	2	1	37.46	2	0	0	0.625275	1.9	23.9903	0	0	23	18.1077	10	107	439.03	144.101	2	1	4	1	0.428571	2	0	4.32193	-0.845	42	C7H13N2O	10	0.26087	36.6127	37.46	3	1	0	3	10	23	0	0	1	1	1	0
ZINC00404269	CC(=O)Nc1ccccc1O	151.063	29	11	1.3506	2	2	49.33	1	1	1	0.642458	2.01	22.7851	6	6	20	11.4569	11	101	290.03	141.699	2	2	3	10	0.5	3	0	4.45943	1.299	50	C8H9NO2	11	0.05	42.4105	49.33	3	2	1	3	11	20	0	0	1	0	0	0
ZINC00005473	COc1ccc(cc1)NC(=S)N	182.051	143	5	1.3507	2	2	79.37	2	1	1	0.634768	1.9	26.6499	6	6	22	13.9881	12	140	352.04	162.415	2	2	3	11	0.5	5	0	4.58496	1.143	54	C8H10N2OS	12	0.0454545	53.4021	47.28	3	3	0	4	12	22	0	0	1	0	0	0
ZINC00107742	Cc1nc(no1)c2ccccc2	160.064	6	3	2.04502	3	0	38.92	1	2	0	0.668893	2.12	24.1763	11	11	20	11.9817	13	139	309.03	135.309	1	0	0	11	0.428571	2	0	4.70044	2.387	60	C9H8N2O	12	0.05	44.471	38.92	3	0	0	3	12	20	0	0	2	0	0	1
ZINC00155331	CCOC(=O)C[NH+]1CCCCC1	172.134	374	2	-0.3817	2	1	30.74	3	0	0	0.716077	2.12	30.5463	0	0	30	23.8717	12	146	768.03	179.123	2	1	5	3	0.5	5	0	4.58496	0.894	52	C9H18NO2	12	0.266667	46.0477	30.74	3	1	0	3	12	30	0	0	1	1	1	0
ZINC00165237	c1ccc(c(c1)C[NH3+])OC(F)(F)F	192.064	139	2	1.3271	1	1	36.87	2	1	0	0.583371	1.79	23.6541	6	6	22	14.0439	13	123	328.05	155.066	0	1	3	7	0.5	7	0	4.70044	2.845	62	C8H9F3NO	13	0.0909091	39.7171	36.87	2	3	0	5	13	22	0	0	1	0	0	0
ZINC00112489	COc1cccc(c1)[C@H](CC(=O)[O-])[NH3+]	195.09	128	3	-0.8818	3	1	77	4	1	0	0.709834	2.12	29.7743	6	6	27	16.7237	14	168	547.04	185.081	2	1	5	7	0.5	7	0	4.80735	0.755	64	C10H13NO3	14	0.111111	48.2471	77	4	3	0	4	14	27	1	0	1	0	0	0
ZINC00155163	C1CCN(CC1)C(=O)N2CCCCC2	196.158	325	2	2.0782	1	0	23.55	0	0	0	0.685814	2.34	35.6979	0	0	34	26.7821	15	183	1043.03	202.247	3	0	2	4	0.5	0	0	4.90689	1.362	68	C11H20N2O	14	0.294118	56.244	23.55	3	0	2	3	14	34	0	0	2	2	2	0
ZINC00167135	c1ccc(c(c1)C(=O)[O-])OC(F)(F)F	205.011	139	2	0.9487	3	0	49.36	2	1	0	0.766799	1.68	20.8242	6	6	18	11.8138	14	134	142.06	156.377	2	0	3	10	0.5	7	0	4.80735	2.323	68	C8H4F3O3	14	0.0555556	37.4555	49.36	3	0	0	6	14	18	0	0	1	0	0	0
ZINC00389604	COc1cc(cc(c1OC)OC)C[NH3+]	198.113	127	3	0.4543	3	1	55.33	4	1	0	0.811675	2.12	31.7747	6	6	30	21.9193	14	144	718.04	189.036	0	1	2	9	0.428571	8	0	4.80735	1.155	64	C10H16NO3	14	0.133333	52.6901	55.33	4	3	0	4	14	30	0	0	1	0	0	0
ZINC00406930	c1ccc(cc1)COc2ccccc2N	199.1	138	8	2.8478	2	1	35.25	3	2	1	0.720973	2.67	33.4503	12	12	28	15.4677	16	227	631.02	190.86	1	1	2	8	0.444444	4	0	5	2.83	72	C13H13NO	15	0.0357143	61.6284	35.25	2	2	0	2	15	28	0	0	2	0	0	0
ZINC00002318	c1ccc(cc1)c2ccc(cc2)CC(=O)[O-]	211.076	62	3	1.646	2	0	40.13	3	2	0	0.791041	2.78	33.5787	12	12	27	13.9413	17	255	544.02	201.994	2	0	3	12	0.5	4	0	5.08746	2.908	78	C14H11O2	16	0.037037	60.589	40.13	2	0	0	2	16	27	0	0	2	0	0	0
ZINC00280823	c1ccc(cc1)C[NH2+]Cc2ccc(cc2)F	216.119	240	4	2.0893	0	1	16.61	4	2	0	0.587105	2.78	36.2989	12	12	31	17.6011	17	290	784.02	206.751	0	1	3	6	0.454545	5	0	5.08746	3.517	76	C14H15FN	16	0.0645161	62.1754	16.61	1	2	0	2	16	31	0	0	2	0	0	0
ZINC00161991	C[NH2+]Cc1ccncc1	123.092	237	3	-0.2252	1	1	29.5	2	1	0	0.638555	2.01	21.8547	6	6	20	13.3453	9	81	328.02	121.774	1	1	3	6	0.5	3	0	4.16993	0.394	38	C7H11N2	9	0.1	35.7904	29.5	2	2	0	2	9	20	0	0	1	0	0	1
ZINC00153943	CC(=O)N1CCC(CC1)[NH2+]C2CC2	183.15	371	3	-0.2769	1	1	36.92	2	0	0	0.680761	2.23	33.2711	0	0	32	23.7089	14	171	933.03	186.269	2	1	3	3	0.5	3	0	4.80735	0.664	66	C10H19N2O	13	0.28125	50.2234	36.92	3	2	1	3	13	32	0	0	2	2	2	0
ZINC00165261	CN(c1ccc(cn1)C(F)(F)F)N	191.067	263	1	1.4103	3	1	42.15	1	1	2	0.563321	1.57	22.6253	6	6	21	13.6747	13	139	285.06	149.655	3	1	3	8	0.428571	7	0	4.70044	0.582	64	C7H8F3N3	13	0.0952381	41.8294	42.15	3	2	0	6	13	21	0	0	1	0	0	1
ZINC00295248	Cc1ccc(o1)c2cccc(c2)N	173.084	111	3	2.83722	2	1	39.16	1	2	1	0.673795	2.45	28.5967	11	11	24	13.2813	14	152	469.02	158.904	1	1	0	12	0.428571	3	0	4.80735	2.081	66	C11H11NO	13	0.0416667	53.2934	39.16	2	2	0	2	13	24	0	0	2	0	0	1
ZINC01494962	CS(=O)(=O)Nc1ccc(cc1)C[NH3+]	201.07	131	5	-0.2	2	2	82.19	3	1	0	0.811448	1.79	29.4523	6	6	26	20.0277	13	155	520.05	175.16	3	2	3	10	0.5	5	0	4.70044	0.918	62	C8H13N2O2S	13	0.0769231	51.5006	73.81	4	4	0	5	13	26	0	0	1	0	0	0
ZINC00153616	c1cc(cc(c1)OC(C(F)F)(F)F)N	209.046	141	1	2.5055	2	1	35.25	3	1	1	0.734953	1.68	22.8776	6	6	21	13.7204	14	155	259.06	159.816	1	1	4	8	0.428571	8	0	4.80735	2.737	68	C8H7F4NO	14	0.0952381	42.4334	35.25	2	2	0	6	14	21	0	0	1	0	0	0
ZINC00158469	c1ccnc(c1)c2ccc(s2)C(=S)N	220.013	257	2	2.4443	3	1	99.24	2	2	1	0.80368	2.12	30.9343	11	11	22	12.8257	15	182	347.04	178.196	2	1	3	14	0.5	3	0	4.90689	0.941	70	C10H8N2S2	14	0	63.4374	38.91	2	2	0	4	14	22	0	0	2	0	0	2
ZINC00082774	c1cc(ccc1c2cc(c(s2)C#N)N)F	218.031	109	3	3.00808	3	1	78.05	1	2	0	0.82422	2.23	29.6846	11	11	22	11.1354	16	214	319.04	180.414	2	1	2	14	0.444444	3	0	5	2.041	76	C11H7FN2S	15	0	58.8404	49.81	2	2	0	4	15	22	0	0	2	0	0	1
ZINC00119243	c1ccc(cc1)COc2cccc(c2)N	199.1	138	8	2.8478	2	1	35.25	3	2	1	0.649962	2.67	33.4503	12	12	28	15.4677	16	229	631.02	190.86	1	1	2	8	0.444444	4	0	5	2.83	72	C13H13NO	15	0.0357143	61.6284	35.25	2	2	0	2	15	28	0	0	2	0	0	0
ZINC00158723	c1ccc(cc1)C[NH+]2CCO[C@H](C2)CO	208.134	213	13	-0.5374	2	2	33.9	3	1	0	0.800186	2.45	35.8263	6	6	33	22.9137	16	221	946.03	202.481	2	2	2	6	0.444444	4	0	5	0.542	72	C12H18NO2	15	0.181818	57.6685	33.9	3	2	0	3	15	33	2	1	2	1	1	0
ZINC00154091	CC(C)(C)OC(=O)N1CCC(CC1)[NH2+]C2CC2	241.192	371	3	1.1117	2	1	46.15	2	0	0	0.780482	2.45	43.3538	0	0	42	32.1842	18	277	1577.04	246.947	3	1	5	4	0.5	7	0	5.16993	2.135	88	C13H25N2O2	17	0.285714	65.7764	46.15	4	2	1	4	17	42	0	0	2	2	2	0
ZINC00154226	c1ccc(c(c1)c2ccc3cccnc3n2)O	222.079	264	1	3.0024	3	1	46.01	1	3	0	0.555695	2.67	34.3099	16	17	27	13.5721	19	261	569.03	190.623	2	1	0	17	0.444444	2	0	5.24793	2.707	90	C14H10N2O	17	0	66.6388	46.01	3	1	0	3	17	27	0	0	3	0	0	2
ZINC00069512	c1cc(ccc1NNC(=S)N)F	185.042	54	5	0.9858	2	3	82.17	2	1	2	0.578919	1.68	24.4113	6	6	20	10.4287	12	144	268.05	153.393	3	3	4	11	0.5	5	0	4.58496	1.871	54	C7H8FN3S	12	0	49.9438	50.08	3	4	0	5	12	20	0	0	1	0	0	0
ZINC00091625	c1cc(ccc1NC(=O)CC#N)Cl	194.025	12	3	2.19218	2	1	52.89	2	1	0	0.730666	2.01	25.6896	6	6	20	10.3504	13	174	244.04	171.14	3	1	5	9	0.444444	3	0	4.70044	1.21	58	C9H7ClN2O	13	0.05	50.3117	52.89	3	1	1	4	13	20	0	0	1	0	0	0
ZINC00169750	c1ccc(cc1)c2cc(on2)C[NH3+]	175.087	117	5	1.0835	2	1	53.67	2	2	0	0.826451	2.23	27.9367	11	11	24	12.6213	14	167	469.03	153.923	0	1	2	11	0.5	3	0	4.80735	2.268	64	C10H11N2O	13	0.0416667	48.5311	53.67	3	3	0	3	13	24	0	0	2	0	0	1
ZINC00168973	c1cc(ccc1n2cc(nn2)CO)Cl	209.036	166	2	1.413	4	1	50.94	2	2	0	0.755266	1.9	27.4563	11	11	22	11.1457	15	199	347.05	161.517	3	1	2	11	0.444444	4	0	4.90689	1.35	70	C9H8ClN3O	14	0.0454545	52.2918	50.94	4	1	0	5	14	22	0	0	2	0	0	1
ZINC00093096	CC(=O)Nc1ccc(cc1)OCC(=O)[O-]	208.061	146	2	-0.2263	4	1	78.46	4	1	0	0.8287	2.01	28.5759	6	6	25	16.3821	15	223	415.05	189.917	4	1	4	10	0.5	6	0	4.90689	0.092	68	C10H10NO4	15	0.08	51.2477	78.46	5	1	1	5	15	25	0	0	1	0	0	0
ZINC00098725	CCOc1ccc(cc1)NC(=O)NC(C)(C)C	236.152	21	5	3.0053	2	2	50.36	3	1	0	0.839816	2.45	40.0199	6	6	37	26.0581	17	281	1097.04	239.176	3	2	5	11	0.454545	8	0	5.08746	2.554	80	C13H20N2O2	17	0.162162	69.5184	50.36	4	2	2	4	17	37	0	0	1	0	0	0
ZINC00196621	CC1(CC(=CC(=O)C1)Nc2cccc(c2)O)C	231.126	42	3	3.0771	3	2	49.33	2	1	0	0.862813	2.67	38.6795	6	6	34	20.2025	18	234	953.03	230.482	2	2	0	12	0.5	5	0	5.16993	2.507	88	C14H17NO2	17	0.147059	67.8345	49.33	3	2	0	3	17	34	0	0	2	0	1	0
ZINC00214016	C[C@H]1CC[C@H](C1)[NH2+]Cc2ccc3c(c2)OCO3	234.149	231	6	1.6673	2	1	35.07	3	1	0	0.63146	2.67	40.6799	6	6	37	25.6961	19	301	1249.03	224.717	0	1	2	8	0.5	4	0	5.24793	2.902	90	C14H20NO2	17	0.216216	64.9974	35.07	3	2	0	3	17	37	2	0	3	1	2	0
ZINC00224574	c1cc(oc1)C(=O)N2CC[NH+](CC2)CC(=O)N	238.119	334	3	-1.8944	3	2	80.98	3	1	0	0.769639	2.01	35.7347	5	5	33	23.9633	18	275	884.06	213.333	4	2	3	8	0.5	3	0	5.16993	-1.593	84	C11H16N3O3	17	0.151515	59.3696	80.98	6	3	2	6	17	33	0	0	2	1	1	1
ZINC00406351	c1ccc(cc1)c2ccc(cc2)n3cnnn3	222.091	281	1	2.3293	4	0	43.6	2	3	0	0.642564	2.45	33.9479	17	17	27	12.9121	19	292	569.04	186.53	3	0	0	17	0.5	2	0	5.24793	3.716	88	C13H10N4	17	0	64.59	43.6	4	0	0	4	17	27	0	0	3	0	0	1
ZINC01077316	CC(C)(C)NC(=O)Nc1ccccc1C(=O)N	235.132	21	5	1.7055	2	3	84.22	2	1	0	0.714213	2.23	37.3595	6	6	34	21.1605	17	219	884.05	230.24	5	3	5	13	0.5	6	0	5.08746	1.532	82	C12H17N3O2	17	0.117647	66.8673	84.22	5	4	3	5	17	34	0	0	1	0	0	0
ZINC00034208	c1cc(ccc1N2C(=O)CCC2=O)OCC(=O)[O-]	248.056	132	3	-0.5313	5	0	86.74	4	1	0	0.827213	2.12	32.8979	6	6	28	18.6601	19	298	535.06	218.306	5	0	4	12	0.5	5	0	5.24793	-0.446	90	C12H10NO5	18	0.107143	58.671	86.74	6	0	2	6	18	28	0	0	2	1	1	0
ZINC00182146	c1ccc(cc1)CCNC(=O)NC2CCCCC2	246.173	96	2	2.861	1	2	41.13	4	1	0	0.878266	2.78	44.0714	6	6	40	26.3286	19	357	1375.03	252.621	3	2	5	6	0.5	4	0	5.24793	3.046	84	C15H22N2O	18	0.2	73.5534	41.13	3	2	2	3	18	40	0	0	2	1	1	0
ZINC00281404	CC1(CC(=CC(=O)C1)Nc2ccccc2C#N)C	240.126	42	3	3.24318	3	1	52.89	2	1	0	0.877309	2.78	40.0707	6	6	34	19.7693	19	247	919.03	244.712	3	1	2	13	0.5	4	0	5.24793	2.636	92	C15H16N2O	18	0.147059	70.8847	52.89	3	1	0	3	18	34	0	0	2	0	1	0
ZINC00361970	CCOc1ccc(cc1)C(=O)Nc2ccccc2	241.11	25	5	3.3376	2	1	38.33	4	2	0	0.87598	2.78	39.1059	12	12	33	19.9321	19	339	850.03	231.605	2	1	3	16	0.5	5	0	5.24793	3.331	86	C15H15NO2	18	0.0606061	72.0062	38.33	3	1	1	3	18	33	0	0	2	0	0	0
ZINC00390491	CC(=O)Nc1ccccc1OCc2ccccc2	241.11	138	8	3.224	2	1	38.33	4	2	0	0.668042	2.78	39.1059	12	12	33	19.9321	19	297	850.03	231.605	2	1	3	10	0.5	5	0	5.24793	2.901	86	C15H15NO2	18	0.0606061	71.5197	38.33	3	1	1	3	18	33	0	0	2	0	0	0
ZINC00012384	COc1ccc2c(c1)cc([nH]2)C[NH3+]	177.103	144	1	0.9184	1	2	52.66	2	2	0	0.634323	2.23	29.2703	9	10	26	15.4677	14	161	573.03	156.56	0	2	2	10	0.5	4	0	4.80735	1.756	66	C10H13N2O	13	0.0769231	51.4428	52.66	3	4	0	3	13	26	0	0	2	0	0	1
ZINC00237930	COc1ccc(cc1)C#CC(=O)[O-]	175.04	128	3	-0.2034	3	0	49.36	1	1	1	0.648458	2.23	24.6736	6	6	20	11.4844	13	173	244.03	167.494	2	0	4	12	0.444444	3	0	4.70044	1.731	58	C10H7O3	13	0.05	44.879	49.36	3	0	0	3	13	20	0	0	1	0	0	0
ZINC00809927	c1cc2c(ccc(c2nc1)O)C[NH+]3CCOCC3	245.129	266	2	0.3555	3	2	46.79	2	2	0	0.691953	2.56	39.7795	10	11	35	23.1405	20	283	1063.04	219.541	2	2	0	11	0.444444	3	0	5.32193	0.911	94	C14H17N2O2	18	0.142857	68.6275	46.79	4	2	0	4	18	35	0	0	3	1	1	1
ZINC00345417	COC(=O)C#Cc1ccc(cc1)Cl	194.013	229	2	1.8645	2	0	26.3	0	1	1	0.59203	2.23	26.0516	6	6	20	10.9464	13	176	244.03	175.233	2	0	5	11	0.444444	3	0	4.70044	3.24	58	C10H7ClO2	13	0.05	50.346	26.3	2	0	0	3	13	20	0	0	1	0	0	0
ZINC00334965	CCNC(=O)N1CCN(CC1)C(=O)C	199.132	313	3	-0.12	2	1	52.65	1	0	0	0.698748	1.9	32.0795	0	0	31	25.1205	14	186	779.05	197.162	5	1	5	4	0.444444	3	0	4.80735	-0.653	64	C9H17N3O2	14	0.225806	52.8997	52.65	5	1	3	5	14	31	0	0	1	1	1	0
ZINC00330282	COC(=O)C#Cc1ccc2ccccc2c1	210.068	229	2	2.3643	2	0	26.3	0	2	1	0.739153	2.78	32.9119	10	11	26	13.8061	17	257	489.02	200.676	2	0	5	15	0.5	2	0	5.08746	3.884	78	C14H10O2	16	0.0384615	62.842	26.3	2	0	0	2	16	26	0	0	2	0	0	0
ZINC00343530	c1ccc(cc1)c2cnc(c(n2)C(=O)N)N	214.085	270	1	0.8247	4	2	94.89	2	2	0	0.822614	2.12	31.2299	12	12	26	13.2101	17	211	489.05	186.621	5	2	3	16	0.5	3	0	5.08746	0.863	80	C11H10N4O	16	0	60.3983	94.89	5	4	1	5	16	26	0	0	2	0	0	1
ZINC01443094	c1cc(ccc1CO)c2ccc(cc2)CO	214.099	64	1	2.3382	2	2	40.46	3	2	0	0.826469	2.78	35.5791	12	12	30	15.3049	17	272	721.02	205.949	2	2	2	12	0.454545	5	0	5.08746	2.34	78	C14H14O2	16	0.0666667	63.7236	40.46	2	2	0	2	16	30	0	0	2	0	0	0
ZINC00017834	CC(C)Sc1nnc(s1)NC(=O)C	217.034	301	5	1.997	5	1	108.42	3	1	1	0.635066	1.57	29.5567	5	5	24	19.5233	13	156	420.06	177.261	4	1	3	8	0.5	6	0	4.70044	1.957	60	C7H11N3OS2	13	0.166667	55.2057	54.88	4	1	1	6	13	24	0	0	1	0	0	1
ZINC00279455	c1cc(cc(c1)F)C[NH+]2CCOCC2	196.114	213	13	0.2408	1	1	13.67	2	1	0	0.783035	2.34	31.8209	6	6	29	20.8371	15	189	718.03	182.463	1	1	0	6	0.5	3	0	4.90689	1.375	68	C11H15FNO	14	0.172414	51.6197	13.67	2	1	0	3	14	29	0	0	2	1	1	0
ZINC01390251	c1cc2c(cc1c3cc[nH]n3)OCO2	188.059	157	3	1.8054	3	1	47.14	1	2	0	0.804674	2.12	26.7383	11	11	22	13.2377	16	178	394.04	149.039	1	1	0	13	0.428571	1	0	5	2.139	76	C10H8N2O2	14	0.0454545	50.1467	47.14	4	1	0	4	14	22	0	0	3	0	1	1
ZINC00028303	CCN(CC)S(=O)(=O)c1ccc(cc1)C	227.098	195	2	2.02552	2	0	45.76	4	1	0	0.725725	2.23	36.2995	6	6	32	27.0405	15	179	814.04	214.733	3	0	5	10	0.5	7	0	4.90689	2.393	72	C11H17NO2S	15	0.15625	61.2858	37.38	3	0	0	4	15	32	0	0	1	0	0	0
ZINC00174174	c1ccc(cc1)CC[NH+]2CCC(CC2)O	206.154	219	3	0.2687	1	2	24.67	3	1	0	0.801667	2.67	38.1179	6	6	35	23.1841	16	246	1086.02	210.987	1	2	2	6	0.5	4	0	5	1.606	72	C13H20NO	15	0.2	60.9505	24.67	2	2	0	2	15	35	0	0	2	1	1	0
ZINC00574499	CS(=O)(=O)N(CC(=O)N)C1CCCCC1	234.104	306	1	0.066	3	1	88.85	4	0	0	0.614392	1.79	35.3483	0	0	33	28.4317	15	162	879.06	216.101	5	1	6	4	0.428571	5	0	4.90689	0.139	72	C9H18N2O3S	15	0.242424	57.6172	80.47	5	2	1	6	15	33	0	0	1	1	1	0
ZINC00296419	CC(=O)Nc1cc(cc(c1)C(=O)N)C(=O)N	221.08	31	3	-0.1572	3	3	115.28	3	1	0	0.760557	1.9	30.6407	6	6	27	14.2393	16	180	489.06	201.802	6	3	3	15	0.428571	4	0	5	-0.95	76	C10H11N3O3	16	0.037037	57.7815	115.28	6	5	3	6	16	27	0	0	1	0	0	0
ZINC00395845	CC(C)(CO)NC(=O)Nc1ccc(cc1)Cl	242.082	21	5	2.2324	2	3	61.36	3	1	0	0.870029	2.12	35.3459	6	6	31	19.0961	16	242	721.05	219.795	4	3	6	10	0.5	7	0	5	1.706	76	C11H15ClN2O2	16	0.129032	64.7712	61.36	4	3	2	5	16	31	0	0	1	0	0	0
ZINC00465399	Cc1ccc(cc1)CC(=O)Nc2nccs2	232.067	104	2	2.63272	3	1	70.23	3	2	0	0.831632	2.34	35.0235	11	11	28	18.3365	17	264	601.04	203.069	3	1	3	8	0.5	4	0	5.08746	1.814	78	C12H12N2OS	16	0.0714286	65.6267	41.99	3	1	1	4	16	28	0	0	2	0	0	1
ZINC00618765	CNc1nc(nc(n1)SC)N2CCOCC2	241.1	284	1	0.4718	7	1	88.47	3	1	0	0.780023	1.68	35.0439	6	6	31	27.1941	17	209	784.07	202.981	6	1	2	8	0.5	5	0	5.08746	0.761	78	C9H15N5OS	16	0.193548	64.1867	63.17	6	1	0	7	16	31	0	0	2	1	1	1
ZINC01234761	C[NH+](Cc1ccccc1)Cc2ccccc2	212.144	215	2	1.9015	0	1	4.44	4	2	0	0.799081	3	39.5023	12	12	34	20.9977	17	263	985.01	217.98	0	1	3	6	0.5	5	0	5.08746	3.324	76	C15H18N	16	0.0882353	67.1787	4.44	1	1	0	1	16	34	0	0	2	0	0	0
ZINC00212385	CC1([C@H]2CC=C([C@@H]1C2)C[NH+]3CCC[C@@H]3CO)C	236.201	387	2	1.0184	1	2	24.67	3	0	0	0.775759	2.89	45.6386	0	0	43	29.7434	19	244	1753.02	249.396	1	2	2	2	0.5	6	0	5.24793	2.533	96	C15H26NO	17	0.302326	68.8825	24.67	2	2	0	2	17	43	4	1	4	2	4	0
ZINC00212563	C[C@H]1CC[C@H](C1)[NH+]2CCN(CC2)c3ccccc3	245.202	182	4	1.5801	1	1	7.68	2	1	0	0.748292	3	47.0298	6	6	43	30.6302	20	333	1719.02	252.725	1	1	0	7	0.454545	3	0	5.32193	3.602	94	C16H25N2	18	0.232558	76.1547	7.68	2	1	0	2	18	43	2	0	3	2	2	0
ZINC00212917	c1cc(ccc1C[NH+]2CC[C@H](C2)O)Cl	212.084	212	2	0.4895	1	2	24.67	2	1	0	0.770156	2.34	33.4439	6	6	29	18.1381	15	205	718.03	191.606	1	2	0	6	0.444444	4	0	4.90689	1.712	70	C11H15ClNO	14	0.172414	56.4765	24.67	2	2	0	3	14	29	2	1	2	1	1	0
ZINC00212939	Cc1ccsc1C[NH+]2CCC[C@@H]2CO	212.111	385	2	0.59612	2	2	52.91	3	1	0	0.876774	2.34	36.1643	5	5	32	23.2777	15	168	907.03	197.541	1	2	2	5	0.428571	5	0	4.90689	0.691	70	C11H18NOS	14	0.21875	58.6975	24.67	2	2	0	3	14	32	2	1	2	1	1	1
ZINC00213127	C[C@@H]1CCCC[NH+]1Cc2ccc(cc2)C(=O)OC	248.165	214	2	1.4305	2	1	30.74	3	1	0	0.781911	2.78	43.7734	6	6	40	28.2446	19	317	1375.03	251.733	2	1	4	9	0.454545	6	0	5.24793	2.874	88	C15H22NO2	18	0.2	70.6282	30.74	3	1	0	3	18	40	2	1	2	1	1	0
ZINC00214040	Cc1cc(c(cc1OC)C)C[NH+]2CC[C@H](C2)O	236.165	211	6	0.46154	2	2	33.9	3	1	0	0.804686	2.67	42.0134	6	6	39	27.2866	18	267	1328.03	237.073	1	2	2	7	0.5	7	0	5.16993	1.668	86	C14H22NO2	17	0.205128	67.4925	33.9	3	2	0	3	17	39	2	1	2	1	1	0
ZINC00214556	c1ccc2c(c1)CC[NH+](C2)Cc3ccccc3O	240.139	206	2	1.5334	1	2	24.67	2	2	0	0.769214	3	42.0643	12	12	36	20.9977	20	308	1138.02	231.709	0	2	0	7	0.5	3	0	5.32193	2.764	94	C16H18NO	18	0.111111	71.4905	24.67	2	2	0	2	18	36	1	1	3	0	1	0
ZINC00214736	CCC1CCC(CC1)[NH+]2CCOCC2	198.186	381	1	0.8703	1	1	13.67	2	0	0	0.753628	2.56	39.025	0	0	38	29.473	15	201	1339.02	212.501	1	1	2	0	0.444444	3	0	4.90689	2.409	68	C12H24NO	14	0.315789	57.5527	13.67	2	1	0	2	14	38	0	0	2	2	2	0
ZINC00215450	CCC1CCC(CC1)[NH2+]C[C@H]2CCCO2	212.201	372	2	1.6976	1	1	25.84	4	0	0	0.748704	2.67	42.1186	0	0	41	30.3394	16	245	1554.02	229.797	1	1	2	0	0.5	5	0	5	3.194	72	C13H26NO	15	0.317073	61.8034	25.84	2	2	0	2	15	41	1	0	2	2	2	0
ZINC00216814	CC(=O)N1CC[NH+](CC1)CCCc2ccccc2	247.181	185	6	0.3662	1	1	24.75	4	1	0	0.789868	2.78	44.7382	6	6	41	29.4018	19	353	1458.03	253.939	2	1	3	6	0.5	5	0	5.24793	1.562	86	C15H23N2O	18	0.195122	72.5807	24.75	3	1	1	3	18	41	0	0	2	1	1	0
ZINC00216852	Cc1c(nc[nH]1)C[NH+]2CCc3ccccc3C2	228.15	389	2	0.85932	1	2	33.12	2	2	0	0.878534	2.67	39.9423	11	11	35	22.9777	19	268	1097.03	212.957	1	2	0	6	0.444444	3	0	5.24793	1.67	90	C14H18N3	17	0.142857	66.7084	33.12	3	2	0	3	17	35	1	1	3	0	1	1
ZINC00217162	Cc1c(n2ccccc2n1)C(=O)NCC(C)C	231.137	349	1	2.02852	3	1	46.4	3	2	0	0.778358	2.45	38.3175	9	10	34	23.5025	18	246	953.04	215.49	3	1	6	12	0.444444	6	0	5.16993	2.731	86	C13H17N3O	17	0.147059	67.1002	46.4	4	1	1	4	17	34	0	0	2	0	0	2
ZINC00217886	c1cc(ccc1C[NH+]2CCC(CC2)C(=O)N)F	237.14	212	2	0.1059	1	2	47.53	3	1	0	0.754129	2.45	38.4413	6	6	35	22.4987	18	299	1024.04	225.415	2	2	3	6	0.454545	4	0	5.16993	0.963	84	C13H18FN2O	17	0.171429	62.7191	47.53	3	3	1	4	17	35	0	0	2	1	1	0
ZINC00220119	c1c(nc[nH]1)CC[NH2+]C2CCCCCC2	208.181	390	1	1.2384	1	2	45.29	4	1	0	0.763735	2.45	39.0894	5	5	37	26.0306	16	235	1234.03	209.531	1	2	3	5	0.444444	4	0	5	2.465	70	C12H22N3	15	0.243243	60.5741	45.29	3	3	0	3	15	37	0	0	2	1	1	1
ZINC00237165	c1cc(cc(c1)O)C[NH+]2CCSCC2	210.095	213	13	0.5239	2	2	49.97	2	1	0	0.807175	2.34	34.8307	6	6	30	21.0913	15	189	779.03	194.904	0	2	0	7	0.5	3	0	4.90689	1.969	68	C11H16NOS	14	0.166667	59.8325	24.67	2	2	0	3	14	30	0	0	2	1	1	0
ZINC00239622	CC(C)c1ccc(cc1)C[NH+]2CCC(CC2)O	234.186	211	6	1.3496	1	2	24.67	3	1	0	0.85598	2.89	44.305	6	6	41	27.557	18	299	1492.02	245.579	1	2	3	6	0.454545	6	0	5.16993	2.853	84	C15H24NO	17	0.219512	70.1725	24.67	2	2	0	2	17	41	0	0	2	1	1	0
ZINC00241179	CCOc1ccc(cc1)C[NH+]2CCSCC2	238.127	213	13	1.217	2	1	38.97	4	1	0	0.833991	2.56	41.0179	6	6	36	27.3801	17	279	1129.03	229.496	0	1	3	7	0.454545	5	0	5.08746	2.713	76	C13H20NOS	16	0.194444	69.3367	13.67	2	1	0	3	16	36	0	0	2	1	1	0
ZINC00247383	C[NH+](C)CC(=O)c1ccc(cc1)c2ccccc2	240.139	224	2	1.6808	1	1	21.51	4	2	0	0.799795	3	42.0643	12	12	36	21.9557	19	315	1063.02	241.429	1	1	5	14	0.454545	6	0	5.24793	3.205	88	C16H18NO	18	0.0833333	73.8862	21.51	2	1	0	2	18	36	0	0	2	0	0	0
ZINC00250141	Cc1ccc(cc1)C(=O)N[C@@H]2C[C@H]3CC[C@@H]2C3	229.147	78	2	2.91342	1	1	29.1	2	1	0	0.817765	2.89	40.9711	6	6	36	22.3889	19	292	1172.02	229.268	2	1	3	9	0.5	3	0	5.24793	3.588	92	C15H19NO	17	0.222222	67.8812	29.1	2	1	1	2	17	36	3	0	3	2	2	0
ZINC00257926	Cc1c(non1)NC(=O)N2CCCCC2	210.112	324	1	1.39582	4	1	71.26	1	1	0	0.879758	1.79	31.1791	5	5	29	20.8189	16	203	690.06	182.266	3	1	3	9	0.5	2	0	5	1.41	74	C9H14N4O2	15	0.206897	53.4777	71.26	6	1	2	6	15	29	0	0	2	1	1	1
ZINC00265863	CN(C)c1ccc(cc1)C(=O)Nc2ccncc2	241.122	24	4	2.3999	3	1	45.23	3	2	0	0.879459	2.56	38.7439	12	12	33	21.3161	19	318	850.04	227.513	4	1	3	16	0.454545	5	0	5.24793	1.95	88	C14H15N3O	18	0.0606061	72.9592	45.23	4	1	1	4	18	33	0	0	2	0	0	1
ZINC00274846	CCCn1c2ccccc2nc1NC(=O)CC	231.137	151	3	2.7948	3	1	46.92	4	2	0	0.837588	2.45	38.3175	9	10	34	23.5025	18	224	953.04	215.49	3	1	4	12	0.5	6	0	5.16993	2.401	84	C13H17N3O	17	0.147059	68.9447	46.92	4	1	1	4	17	34	0	0	2	0	0	1
ZINC00276329	CC[C@H](C)NC(=O)[C@@H]1C[C@H]1c2ccccc2	217.147	102	2	2.7048	1	1	29.1	4	1	0	0.793779	2.78	39.2111	6	6	35	22.3889	17	254	1056.02	224.328	2	1	6	6	0.5	6	0	5.08746	2.537	80	C14H19NO	16	0.2	65.1857	29.1	2	1	1	2	16	35	3	0	2	1	1	0
ZINC00277754	COc1ccc(cc1OC)C[NH+]2CCOCC2	238.144	213	13	0.1189	3	1	32.13	4	1	0	0.780207	2.45	39.7219	6	6	37	28.9321	18	272	1172.04	228.568	1	1	2	8	0.5	6	0	5.16993	0.776	82	C13H20NO3	17	0.189189	64.7657	32.13	4	1	0	4	17	37	0	0	2	1	1	0
ZINC00277870	c1cc(cc(c1)Cl)C[NH+]2CCOCC2	212.084	213	13	0.7551	1	1	13.67	2	1	0	0.760817	2.34	33.4439	6	6	29	20.0541	15	189	718.03	191.606	1	1	0	6	0.5	3	0	4.90689	1.836	68	C11H15ClNO	14	0.172414	56.6717	13.67	2	1	0	3	14	29	0	0	2	1	1	0
ZINC00278409	CC(=O)Nc1ccc(cc1)C[NH+]2CCOCC2	235.145	213	13	0.0601	2	2	42.77	3	1	0	0.731875	2.45	39.3531	6	6	36	25.6249	18	300	1097.04	228.138	3	2	3	9	0.454545	4	0	5.16993	0.468	82	C13H19N2O2	17	0.166667	65.9654	42.77	4	2	1	4	17	36	0	0	2	1	1	0
ZINC00278435	Cc1cccc(c1)C[NH+]2CCOCC2	192.139	213	13	0.41012	1	1	13.67	2	1	0	0.855081	2.56	35.0243	6	6	32	22.9137	15	189	907.02	193.691	1	1	0	6	0.5	3	0	4.90689	1.651	68	C12H18NO	14	0.1875	56.3987	13.67	2	1	0	2	14	32	0	0	2	1	1	0
ZINC00279845	CC(C)(C)C1CCC(CC1)[NH2+]Cc2ccncc2	247.217	237	3	2.7499	1	1	29.5	3	1	0	0.777338	3	48.3634	6	6	45	30.8366	19	326	1810.02	265.082	1	1	3	6	0.454545	7	0	5.24793	4.413	90	C16H27N2	18	0.244444	75.0674	29.5	2	2	0	2	18	45	0	0	2	1	1	1
ZINC00282353	Cc1cc(cc(c1NC)C)[N+](C)(C)C	193.17	73	1	2.54184	1	1	12.03	2	1	0	0.778707	2.56	37.3227	6	6	35	26.2573	14	144	1043.02	208.254	1	1	3	8	0.428571	8	0	4.80735	1.536	70	C12H21N2	14	0.171429	65.0287	12.03	2	1	0	2	14	35	0	0	1	0	0	0
ZINC00316079	c1cc(ccc1OCC(=O)N2CCCC2)F	223.101	189	4	1.8269	2	0	29.54	3	1	0	0.886477	2.34	33.7161	6	6	30	21.3619	17	266	721.04	204.594	2	0	4	7	0.5	4	0	5.08746	1.918	78	C12H14FNO2	16	0.166667	57.709	29.54	3	0	1	4	16	30	0	0	2	1	1	0
ZINC00355189	COCC(=O)Nc1nc(cs1)c2ccccc2	248.062	85	4	2.395	4	1	79.46	4	2	0	0.80579	2.23	35.8255	11	11	29	20.2525	18	295	628.05	211.86	4	1	5	14	0.454545	5	0	5.16993	1.594	82	C12H12N2O2S	17	0.0689655	68.0557	51.22	4	1	1	5	17	29	0	0	2	0	0	1
ZINC00362862	c1ccc(cc1)CCC(=O)Nc2ccc(cc2)O	241.11	30	3	2.9635	2	2	49.33	4	2	1	0.747627	2.78	39.1059	12	12	33	18.0161	19	349	850.03	231.605	2	2	4	10	0.5	5	0	5.24793	2.568	86	C15H15NO2	18	0.0606061	71.4995	49.33	3	2	1	3	18	33	0	0	2	0	0	0
ZINC00365541	c1ccc2c(c1)OC[C@@H](O2)C(=O)N3CCOCC3	249.1	192	1	0.6852	4	0	48	1	1	0	0.848813	2.34	37.1899	6	6	33	25.0841	20	304	919.05	221.047	3	0	2	8	0.5	1	0	5.32193	0.391	94	C13H15NO4	18	0.181818	63.752	48	5	0	1	5	18	33	1	0	3	1	2	0
ZINC00392253	c1ccc(cc1)CNc2ccc(cc2)C(=O)[O-]	226.087	58	4	1.6622	3	1	52.16	4	2	0	0.903746	2.67	35.3455	12	12	29	15.6945	18	305	628.03	212.991	3	1	3	10	0.454545	5	0	5.16993	2.512	82	C14H12NO2	17	0.0344828	64.5412	52.16	3	1	0	3	17	29	0	0	2	0	0	0
ZINC00443691	c1ccc(cc1)SCC(=O)NC2CCCCC2	249.119	147	2	3.2276	2	1	54.4	4	1	0	0.736076	2.67	42.1111	6	6	36	24.6689	18	309	1097.03	242.838	2	1	4	6	0.454545	4	0	5.16993	3.499	80	C14H19NOS	17	0.194444	72.1817	29.1	2	1	1	3	17	36	0	0	2	1	1	0
ZINC00458549	COCC(=O)Nc1ccccc1C(=O)N	208.085	27	5	0.3704	3	2	81.42	4	1	0	0.796789	2.01	30.2075	6	6	27	16.9505	15	189	519.05	193.442	5	2	5	12	0.5	5	0	4.90689	0.074	68	C10H12N2O3	15	0.0740741	55.4656	81.42	5	3	2	5	15	27	0	0	1	0	0	0
ZINC00463042	Cc1ccc(c(c1)O)NC2=CC(=O)CC(C2)(C)C	245.142	42	3	3.38552	3	2	49.33	2	1	1	0.742355	2.78	41.7731	6	6	37	22.3889	19	270	1138.03	247.778	2	2	0	12	0.444444	6	0	5.24793	3.373	94	C15H19NO2	18	0.162162	72.5715	49.33	3	2	0	3	18	37	0	0	2	0	1	0
ZINC00471031	CC(C)(C)NC(=O)N1CCC(CC1)C(=O)N	227.163	321	2	0.6918	2	2	75.43	1	0	0	0.808466	2.12	38.2667	0	0	37	26.8533	16	220	1129.05	231.754	5	2	5	4	0.444444	5	0	5	-0.02	78	C11H21N3O2	16	0.243243	61.7761	75.43	5	3	3	5	16	37	0	0	1	1	1	0
ZINC00529238	c1ccc(c(c1)C(=O)NCCc2ccncc2)F	244.101	95	2	2.1932	2	1	41.99	4	2	0	0.700163	2.56	36.8673	12	12	31	18.3527	19	330	718.04	222.583	3	1	5	9	0.454545	5	0	5.24793	2.204	86	C14H13FN2O	18	0.0645161	66.6742	41.99	3	1	1	4	18	31	0	0	2	0	0	1
ZINC00545533	CC(=O)N1CCNC(=O)[C@@H]1CC(=O)OC	214.095	318	2	-1.1036	4	1	75.71	2	0	0	0.683707	1.79	30.5831	0	0	29	22.7349	15	166	631.06	201.109	6	1	4	3	0.428571	5	0	4.90689	-1.222	70	C9H14N2O4	15	0.206897	50.8177	75.71	6	1	2	6	15	29	1	0	1	1	1	0
ZINC00557550	CCCC(=O)Nc1nnn(n1)CC	183.112	204	2	0.4316	5	1	72.7	4	1	0	0.818729	1.57	27.2903	5	5	26	17.8097	13	173	520.06	162.237	5	1	5	8	0.444444	6	0	4.70044	0.996	58	C7H13N5O	13	0.192308	47.0287	72.7	6	1	1	6	13	26	0	0	1	0	0	1
ZINC00571921	CCNC(=O)c1ccc(cc1)NS(=O)(=O)C	242.073	133	4	0.8078	3	2	83.65	4	1	0	0.86267	1.9	34.4411	6	6	30	24.0589	16	238	660.06	214.587	5	2	5	13	0.5	6	0	5	1.09	76	C10H14N2O3S	16	0.1	62.9157	75.27	5	2	1	6	16	30	0	0	1	0	0	0
ZINC00618437	c1cc(cc(c1)NC(=O)CCC2CCCC2)C#N	242.142	30	3	3.46718	2	1	52.89	4	1	0	0.739101	2.78	41.4043	6	6	36	21.9557	19	327	1063.03	247.348	3	1	4	11	0.454545	4	0	5.24793	3.696	86	C15H18N2O	18	0.194444	70.9787	52.89	3	1	1	3	18	36	0	0	2	1	1	0
ZINC00618490	CN(C)C(=O)Oc1ccc(cc1)c2nnco2	233.08	124	1	1.797	5	0	68.46	2	2	0	0.828069	2.01	32.4007	11	11	28	20.1153	18	277	569.06	195.842	4	0	4	15	0.5	5	0	5.16993	2.459	84	C11H11N3O3	17	0.0714286	59.445	68.46	6	0	1	6	17	28	0	0	2	0	0	1
ZINC00620251	CC1CCN(CC1)C(=O)c2cc3ccccc3o2	243.126	187	1	3.3049	2	0	33.45	1	2	0	0.821772	2.78	40.4395	9	10	35	23.4385	20	306	1063.03	224.522	2	0	2	12	0.5	2	0	5.32193	2.997	96	C15H17NO2	18	0.171429	70.5155	33.45	3	0	1	3	18	35	0	0	3	1	1	1
ZINC00621626	CC(C)(CO)NC(=O)c1cccc(c1)Cl	227.071	79	3	1.8407	2	2	49.33	3	1	0	0.728281	2.23	33.5791	6	6	29	17.3429	15	185	631.04	208.798	3	2	6	9	0.5	7	0	4.90689	2.217	72	C11H14ClNO2	15	0.137931	60.083	49.33	3	2	1	4	15	29	0	0	1	0	0	0
ZINC00757133	Cc1c(nc[nH]1)C[NH+]2CCCCCC2	194.166	389	2	0.67702	1	2	33.12	2	1	0	0.789264	2.34	35.9959	5	5	34	25.1641	15	172	1043.03	192.235	1	2	0	5	0.428571	3	0	4.90689	1.336	68	C11H20N3	14	0.235294	56.1934	33.12	3	2	0	3	14	34	0	0	2	1	1	1
ZINC00766484	CC[NH+]1CCC(CC1)Nc2ccccc2F	223.161	217	1	1.3048	1	2	16.47	3	1	0	0.846728	2.56	38.9729	6	6	36	25.0471	17	257	1129.03	219.261	1	2	2	7	0.5	5	0	5.08746	2.489	78	C13H20FN2	16	0.194444	64.2824	16.47	2	2	0	3	16	36	0	0	2	1	1	0
ZINC00780041	c1cc(cnc1)NC(=O)CC2CCCCC2	218.142	254	3	2.9905	2	1	41.99	3	1	0	0.810032	2.56	37.8843	6	6	34	22.6157	17	263	985.03	218.029	3	1	3	9	0.5	3	0	5.08746	2.721	76	C13H18N2O	16	0.205882	64.0587	41.99	3	1	1	3	16	34	0	0	2	1	1	1
ZINC00859043	c1nncn1NC(=O)CC2CCCCC2	208.132	308	2	1.3186	4	1	59.81	3	1	0	0.848347	2.01	33.4707	5	5	31	21.0893	16	228	814.05	190.771	4	1	3	8	0.444444	3	0	5	2.985	72	C10H16N4O	15	0.225806	55.5817	59.81	5	1	1	5	15	31	0	0	2	1	1	1
ZINC01016488	c1ccnc(c1)C(=O)NCCc2ccc(cc2)O	242.106	95	2	1.7597	3	2	62.22	4	2	0	0.810076	2.56	37.7791	12	12	32	18.2429	19	353	783.04	225.306	3	2	5	9	0.5	5	0	5.24793	1.726	86	C14H14N2O2	18	0.0625	68.381	62.22	4	2	1	4	18	32	0	0	2	0	0	1
ZINC01226886	CC[C@H](C)NC(=O)Nc1cccc(c1)Cl	226.087	10	9	3.26	1	2	41.13	3	1	0	0.802754	2.23	34.5439	6	6	30	19.0961	15	210	690.04	211.005	3	2	6	10	0.444444	6	0	4.90689	2.779	68	C11H15ClN2O	15	0.133333	63.3594	41.13	3	2	2	4	15	30	1	0	1	0	0	0
ZINC01233107	c1ccc(c(c1)c2ccc(cc2)N)C(=O)[O-]	212.071	62	3	1.2993	3	1	66.15	2	2	1	0.66372	2.56	32.2519	12	12	26	12.1881	17	211	489.03	195.695	3	1	3	16	0.5	4	0	5.08746	2.279	80	C13H10NO2	16	0	60.6209	66.15	3	2	0	3	16	26	0	0	2	0	0	0
ZINC00278193	c1ccc(c(c1)C[NH+]2CCOCC2)O	194.118	213	13	-0.1927	2	2	33.9	2	1	0	0.651845	2.34	32.7327	6	6	30	20.7273	15	187	779.03	185.185	1	2	0	7	0.5	3	0	4.90689	0.808	68	C11H16NO2	14	0.166667	53.3265	33.9	3	2	0	3	14	30	0	0	2	1	1	0
ZINC00285476	c1ccc(c(c1)CNc2[nH]c3ccccc3n2)O	239.106	49	5	2.8806	3	3	60.94	3	3	0	0.464056	2.56	37.4103	15	16	31	16.8517	20	318	783.04	204.256	2	3	2	10	0.5	4	0	5.32193	2.759	94	C14H13N3O	18	0.0322581	71.5272	60.94	4	3	0	4	18	31	0	0	3	0	0	1
ZINC00160345	C[NH+]1CCS(=O)(=O)CC1	150.059	379	1	-2.0705	2	1	46.96	0	0	0	0.683467	1.57	22.4055	0	0	21	20.9145	9	67	369.04	131.084	2	1	0	2	0.4	1	0	4.16993	-0.556	44	C5H12NO2S	9	0.238095	35.2745	38.58	3	1	0	4	9	21	0	0	1	1	1	0
ZINC00169677	c1ccc(cc1)COc2ccc(cc2)C(=O)[O-]	227.071	138	8	1.6291	3	0	49.36	4	2	0	0.688195	2.67	34.3807	12	12	28	15.8573	18	305	569.03	210.785	2	0	3	10	0.454545	5	0	5.16993	2.781	82	C14H11O3	17	0.0357143	61.5465	49.36	3	0	0	3	17	28	0	0	2	0	0	0
ZINC00258314	CC(=O)Oc1ccc2c(c1)nsn2	194.015	357	2	1.6166	5	0	80.32	1	2	1	0.591829	1.79	24.7848	9	10	19	14.3532	14	153	244.05	145.312	3	0	3	12	0.428571	3	0	4.80735	1.994	66	C8H6N2O2S	13	0.0526316	48.724	52.08	4	0	0	5	13	19	0	0	2	0	0	1
ZINC00388191	CNc1ccc(cc1)O	123.068	71	1	1.4339	2	2	32.26	1	1	1	0.451629	2.01	20.2231	6	6	18	10.4989	9	77	252.02	118.25	1	2	2	8	0.5	3	0	4.16993	1.262	40	C7H9NO	9	0.0555556	37.6535	32.26	2	2	0	2	9	18	0	0	1	0	0	0
ZINC00388749	C1COCC[NH+]1CCO	132.102	383	2	-2.1062	2	2	33.9	2	0	0	0.733123	1.79	22.5991	0	0	23	18.5409	9	81	457.03	129.871	2	2	3	0	0.5	3	0	4.16993	-1.205	38	C6H14NO2	9	0.26087	33.4685	33.9	3	2	0	3	9	23	0	0	1	1	1	0
ZINC01388877	CC(C)Oc1cc(c(cc1Cl)Cl)N	219.022	167	1	3.3628	2	1	35.25	2	1	1	0.689026	2.01	29.4367	6	6	24	14.1213	13	135	420.04	183.264	1	1	3	8	0.428571	7	0	4.70044	3.247	62	C9H11Cl2NO	13	0.125	56.6384	35.25	2	2	0	4	13	24	0	0	1	0	0	0
ZINC00152601	c1ccc(c(c1)N)N2CCOCC2	178.111	178	4	1.1054	3	1	38.49	1	1	1	0.754554	2.23	29.9371	6	6	27	18.5409	14	151	628.03	168.778	3	1	0	8	0.428571	2	0	4.80735	1.134	64	C10H14N2O	13	0.148148	53.8864	38.49	3	2	0	3	13	27	0	0	2	1	1	0
ZINC00161960	c1ccc(cc1)COC(=O)N2CCC(CC2)O	235.121	200	2	1.7799	3	1	49.77	2	1	0	0.542631	2.45	37.7215	6	6	34	23.4385	18	303	953.04	224.613	4	1	4	6	0.454545	4	0	5.16993	1.567	82	C13H17NO3	17	0.176471	63.4408	49.77	4	1	1	4	17	34	0	0	2	1	1	0
ZINC00164516	COC(=O)C1CC1	100.052	319	2	0.5694	2	0	26.3	1	0	0	0.55292	1.79	15.7383	0	0	15	11.6197	7	44	183.02	97.6239	2	0	4	3	0.5	3	0	3.80735	0.447	32	C5H8O2	7	0.266667	24.74	26.3	2	0	0	2	7	15	0	0	1	1	1	0
ZINC00164621	CCOC(=O)c1ccoc1	140.047	291	1	1.4563	3	0	39.44	2	1	0	0.499511	1.9	20.0603	5	5	18	13.5357	10	93	234.03	124.833	2	0	5	8	0.5	4	0	4.32193	0.986	44	C7H8O3	10	0.111111	34.6645	39.44	3	0	0	3	10	18	0	0	1	0	0	1
ZINC00391249	C[NH+]1CCC[C@@H]1CO	116.108	387	2	-1.3442	1	2	24.67	1	0	0	0.586431	1.9	21.7971	0	0	22	16.6249	8	51	428.02	121.081	1	2	2	0	0.5	3	0	4	-0.262	36	C6H14NO	8	0.272727	31.8615	24.67	2	2	0	2	8	22	2	1	1	1	1	0
ZINC00396091	c1ccc(cc1)COCC(=O)[O-]	165.055	198	1	-0.0469	3	0	49.36	4	1	0	0.715654	2.12	24.2471	6	6	21	13.6709	12	150	309.03	155.47	3	0	5	6	0.5	5	0	4.58496	0.631	52	C9H9O3	12	0.0952381	41.105	49.36	3	0	0	3	12	21	0	0	1	0	0	0
ZINC00404661	CCN(CCO)c1ccc(cc1)N	180.126	176	4	1.0874	3	2	49.49	4	1	1	0.70634	2.23	31.2707	6	6	29	18.8113	13	153	685.03	181.134	3	2	6	8	0.5	7	0	4.70044	1.128	58	C10H16N2O	13	0.137931	55.8272	49.49	3	3	0	3	13	29	0	0	1	0	0	0
ZINC00967734	Cc1cc(nc(n1)Nc2ccccc2)C	199.111	277	3	2.83704	3	1	37.81	2	2	0	0.695489	2.45	33.0883	12	12	28	17.5117	16	204	631.03	186.767	3	1	0	13	0.5	4	0	5	2.299	74	C12H13N3	15	0.0714286	61.2307	37.81	3	1	0	3	15	28	0	0	2	0	0	1
ZINC01389101	CNC(=O)c1cc(ccn1)Cl	170.025	262	1	1.0946	2	1	41.99	1	1	0	0.606516	1.79	22.1696	6	6	18	11.0104	11	101	214.04	141.821	3	1	4	9	0.5	3	0	4.45943	0.886	50	C7H7ClN2O	11	0.0555556	42.6372	41.99	3	1	1	4	11	18	0	0	1	0	0	1
ZINC00391131	COC(=O)c1ccncc1	137.048	65	2	0.8682	3	0	39.19	1	1	0	0.653367	1.9	19.6916	6	6	17	11.8464	10	90	199.03	124.403	3	0	4	9	0.5	3	0	4.32193	0.706	44	C7H7NO2	10	0.0588235	35.5765	39.19	3	0	0	3	10	17	0	0	1	0	0	1
ZINC00409316	CCOC(=O)c1c[nH]nc1	140.059	290	1	0.5864	3	1	54.98	2	1	0	0.754783	1.68	19.6983	5	5	18	12.2797	10	93	234.04	120.741	3	1	5	8	0.5	4	0	4.32193	1.498	44	C6H8N2O2	10	0.111111	34.5442	54.98	4	1	0	4	10	18	0	0	1	0	0	1
ZINC01400156	CCOC(=O)c1c(nc(s1)C)C(F)(F)F	239.023	289	1	2.64702	4	0	67.43	2	1	0	0.833988	1.57	26.6893	5	5	23	18.8287	15	165	319.07	181.047	3	0	5	8	0.428571	9	0	4.90689	1.686	74	C8H8F3NO2S	15	0.173913	47.8095	39.19	3	0	0	7	15	23	0	0	1	0	0	1
ZINC00022035	C[NH+]1CCN(CC1)c2nc3ccccc3s2	234.106	170	2	0.631	3	1	48.81	1	2	0	0.734293	2.34	37.9887	9	10	32	24.3913	18	249	916.04	199.511	2	1	0	10	0.444444	2	0	5.16993	1.744	86	C12H16N3S	16	0.15625	68.4537	20.57	3	1	0	4	16	32	0	0	3	1	1	1
ZINC00090757	C[NH+](C)CCN1C(=O)c2ccccc2C1=O	219.113	224	2	-0.5729	2	1	41.82	3	1	0	0.884757	2.34	34.9259	6	6	31	21.6141	17	209	784.04	208.205	3	1	4	11	0.5	5	0	5.08746	0.828	82	C12H15N2O2	16	0.129032	59.4867	41.82	4	1	2	4	16	31	0	0	2	0	1	0
ZINC00117301	CC(C)(C)NC(=O)Cn1ccc(n1)C(F)(F)F	249.109	352	1	1.8166	3	1	46.92	2	1	0	0.844738	1.79	32.7081	5	5	31	22.5119	17	241	689.07	210.334	3	1	5	5	0.444444	10	0	5.08746	1.949	86	C10H14F3N3O	17	0.193548	55.1247	46.92	4	1	1	7	17	31	0	0	1	0	0	1
ZINC00125701	C[C@]1(C(=O)NC(=O)N1)CCc2ccc(cc2)OC	248.116	118	2	1.2259	3	2	67.43	4	1	1	0.829737	2.34	38.1547	6	6	34	22.6433	19	319	919.05	232.973	4	2	2	7	0.454545	6	0	5.24793	1.465	92	C13H16N2O3	18	0.147059	66.3944	67.43	5	2	3	5	18	34	1	0	2	1	1	0
ZINC00134113	Cc1cccc(c1)Cc2cnc(s2)NC(=O)C	246.083	104	2	3.00072	3	1	70.23	3	2	0	0.745644	2.45	38.1171	11	11	31	20.5229	18	277	752.04	220.365	3	1	3	8	0.5	5	0	5.16993	1.665	84	C13H14N2OS	17	0.0967742	70.4027	41.99	3	1	1	4	17	31	0	0	2	0	0	1
ZINC00142713	CC(C)CC(=O)Nc1ccc(cc1)C(=O)NN	235.132	29	11	1.2747	3	3	84.22	4	1	3	0.425074	2.23	37.3595	6	6	34	19.8405	17	279	884.05	230.24	5	3	5	13	0.454545	7	0	5.08746	1.013	78	C12H17N3O2	17	0.117647	66.1803	84.22	5	4	2	5	17	34	0	0	1	0	0	0
ZINC00152549	CC(C)[NH2+]Cc1ccc(cc1)N(C)C	193.17	234	1	1.2244	1	1	19.85	4	1	0	0.789291	2.56	37.3227	6	6	35	24.9373	14	190	1043.02	208.254	1	1	4	7	0.444444	8	0	4.80735	2.738	64	C12H21N2	14	0.171429	61.5344	19.85	2	2	0	2	14	35	0	0	1	0	0	0
ZINC00153520	c1cc(oc1)C(=O)N[C@@H]2CCCCNC2=O	222.1	344	2	0.6781	3	2	71.34	2	1	0	0.850116	2.12	33.3011	5	5	30	20.4569	17	219	721.05	201.018	4	2	3	8	0.5	2	0	5.08746	0.695	78	C11H14N2O3	16	0.166667	56.8229	71.34	5	2	2	5	16	30	1	0	2	1	1	1
ZINC00161500	c1ccc(cc1)C[NH+]2CCC(CC2)n3cccc3	241.17	210	1	1.9081	1	1	9.37	3	2	0	0.691456	3	44.3627	11	11	39	26.2573	20	341	1375.02	236.552	0	1	0	6	0.454545	3	0	5.32193	3.07	92	C16H21N2	18	0.153846	73.5457	9.37	2	1	0	2	18	39	0	0	3	1	1	1
ZINC00163917	c1ccc(cc1)CNc2c[nH]c(=O)[nH]c2=O	217.085	359	2	0.6753	3	3	77.75	3	2	0	0.803236	2.12	31.5987	12	12	27	15.9213	17	261	544.05	197.951	1	3	2	9	0.5	3	0	5.08746	1.606	78	C11H11N3O2	16	0.037037	61.4521	77.75	5	3	0	5	16	27	0	0	2	0	0	1
ZINC00178514	c1ccc(cc1)CC(=O)N2CCc3c2cccc3	237.115	193	2	2.8184	1	0	20.31	2	2	0	0.785641	3	40.0639	12	12	33	19.3361	20	307	919.02	227.755	2	0	3	9	0.5	2	0	5.32193	2.793	94	C16H15NO	18	0.0909091	72.645	20.31	2	0	1	2	18	33	0	0	3	0	1	0
ZINC00206168	c1cc(ccc1C[NH2+]C2CCCCC2)O	206.154	233	4	1.7883	1	2	36.84	3	1	0	0.869216	2.67	38.1179	6	6	35	21.8641	16	246	1086.02	210.987	0	2	2	7	0.5	4	0	5	3.068	72	C13H20NO	15	0.2	60.6092	36.84	2	3	0	2	15	35	0	0	2	1	1	0
ZINC00210537	Cc1c(c(n[nH]1)C)CCOc2ccc(cc2)F	234.117	165	1	2.78714	2	1	37.91	4	2	0	0.827647	2.45	36.4409	11	11	32	20.1771	18	289	817.04	210.56	1	1	3	7	0.5	7	0	5.16993	3.108	84	C13H15FN2O	17	0.125	63.6607	37.91	3	1	0	4	17	32	0	0	2	0	0	1
ZINC00278104	Cc1ccc(o1)C[NH+](C)Cc2ccccc2	216.139	339	3	1.80292	1	1	17.58	4	2	0	0.882264	2.78	38.5443	11	11	34	22.9137	17	262	985.02	212.11	0	1	3	6	0.5	6	0	5.08746	2.257	78	C14H18NO	16	0.117647	64.1817	17.58	2	1	0	2	16	34	1	1	2	0	0	1
ZINC00299931	COc1ccc(cc1)C(=O)Nc2ccccc2F	245.085	25	5	3.0866	2	1	38.33	3	2	0	0.871785	2.56	35.9025	12	12	30	17.8555	19	316	655.04	220.377	2	1	3	16	0.454545	5	0	5.24793	3.069	88	C14H12FNO2	18	0.0333333	67.3472	38.33	3	1	1	4	18	30	0	0	2	0	0	0
ZINC00302145	C1CCC(CC1)C(=O)N2CCC(CC2)C(=O)N	238.168	320	3	1.2906	2	1	63.4	2	0	0	0.737214	2.45	41.3534	0	0	39	27.2866	18	272	1328.04	242.992	4	1	3	3	0.5	2	0	5.16993	0.953	84	C13H22N2O2	17	0.282051	65.0734	63.4	4	2	2	4	17	39	0	0	2	2	2	0
ZINC00361814	C[C@H](c1ccccc1)NC(=O)COC	193.11	85	4	1.5102	2	1	38.33	4	1	0	0.727202	2.34	32.0659	6	6	29	19.9321	14	191	659.03	193.587	3	1	7	6	0.444444	6	0	4.80735	1.428	62	C11H15NO2	14	0.137931	54.8757	38.33	3	1	1	3	14	29	1	0	1	0	0	0
ZINC00363785	COCC(=O)Nc1ccc(cc1)O	181.074	27	5	0.9771	3	2	58.56	3	1	1	0.812932	2.01	26.6807	6	6	24	15.5593	13	174	420.04	167.785	3	2	5	10	0.444444	5	0	4.70044	0.352	58	C9H11NO3	13	0.0833333	48.6125	58.56	4	2	1	4	13	24	0	0	1	0	0	0
ZINC00364954	Cc1ccc(cc1)OCC(=O)Nc2cc(on2)C	246.1	113	4	2.30894	4	1	64.36	4	2	0	0.862476	2.34	36.8211	11	11	32	20.7549	19	350	783.05	219.437	2	1	4	8	0.5	6	0	5.24793	2.395	88	C13H14N2O3	18	0.09375	66.5437	64.36	5	1	1	5	18	32	0	0	2	0	0	1
ZINC00383749	Cc1cccc(c1)C(=O)Nc2ccc(cc2O)C	241.11	33	4	3.26134	2	2	49.33	2	2	1	0.772532	2.78	39.1059	12	12	33	18.0161	19	293	850.03	231.605	2	2	3	16	0.5	5	0	5.24793	3.89	90	C15H15NO2	18	0.0606061	71.976	49.33	3	2	1	3	18	33	0	0	2	0	0	0
ZINC00394197	c1cc(oc1)CNC(=O)NCc2ccco2	220.085	345	2	1.872	3	2	67.41	4	2	0	0.573273	2.12	31.9675	10	10	28	19.2285	17	273	601.05	187.481	3	2	5	5	0.5	4	0	5.08746	0.164	76	C11H12N2O3	16	0.0714286	56.4914	67.41	5	2	2	5	16	28	0	0	2	0	0	2
ZINC00394739	CC(=O)N[C@@H](Cc1ccc(cc1)O)C(=O)NN	237.111	100	1	-0.5707	4	4	104.45	4	1	3	0.375884	2.01	35.0679	6	6	32	17.6541	17	238	752.06	221.734	5	4	7	7	0.444444	7	0	5.08746	-0.551	78	C11H15N3O3	17	0.09375	61.7456	104.45	6	5	2	6	17	32	1	0	1	0	0	0
ZINC00395358	C[C@@H](CNC(=O)Nc1ccccc1)O	194.106	21	5	1.1889	2	3	61.36	3	1	0	0.763469	2.12	30.7391	6	6	28	17.5829	14	195	602.04	187.288	4	3	6	10	0.444444	5	0	4.80735	0.667	62	C10H14N2O2	14	0.107143	55.1442	61.36	4	3	2	4	14	28	1	0	1	0	0	0
ZINC00399805	c1cc(cc(c1)O)NC(=O)Nc2ccc(cc2)F	246.08	10	9	3.1753	2	3	61.36	2	2	0	0.866274	2.34	34.5757	12	12	29	15.5063	19	324	594.05	214.078	3	3	3	17	0.454545	4	0	5.24793	2.237	88	C13H11FN2O2	18	0	67.1482	61.36	4	3	2	5	18	29	0	0	2	0	0	0
ZINC00406702	c1ccc(cc1)OCC(=O)Nc2ccccc2O	243.09	145	5	2.4097	3	2	58.56	4	2	1	0.722467	2.56	36.8143	12	12	31	17.7457	19	328	718.04	223.1	2	2	4	10	0.454545	5	0	5.24793	2.698	86	C14H13NO3	18	0.0322581	68.6735	58.56	4	2	1	4	18	31	0	0	2	0	0	0
ZINC00406752	CC[C@H](CO)NC(=O)Nc1ccc(cc1)Cl	242.082	10	9	2.2324	2	3	61.36	4	1	0	0.636206	2.12	35.3459	6	6	31	19.0961	16	244	721.05	219.795	4	3	6	10	0.5	7	0	5	1.647	72	C11H15ClN2O2	16	0.129032	64.7712	61.36	4	3	2	5	16	31	1	0	1	0	0	0
ZINC00409878	C[C@H](C[NH2+]C1CCCCC1)O	158.154	370	2	0.2633	1	2	36.84	3	0	0	0.785895	2.23	31.0779	0	0	31	21.8641	11	120	851.02	172.969	1	2	4	0	0.428571	5	0	4.45943	1.515	48	C9H20NO	11	0.290323	45.3462	36.84	2	3	0	2	11	31	1	0	1	1	1	0
ZINC00410282	c1cc(ccc1C(=O)Nc2ccc(cc2)O)Cl	247.04	25	5	3.2979	2	2	49.33	2	2	1	0.753532	2.45	34.4319	12	12	27	12.9701	18	297	512.04	212.224	2	2	3	16	0.454545	4	0	5.16993	3.209	84	C13H10ClNO2	17	0	67.512	49.33	3	2	1	4	17	27	0	0	2	0	0	0
ZINC00410823	c1ccnc(c1)NC(=O)c2cnccn2	200.07	255	2	1.1239	4	1	67.77	2	2	0	0.885245	2.01	28.1363	12	12	23	14.3237	16	223	366.05	169.325	5	1	3	15	0.444444	2	0	5	0.054	72	C10H8N4O	15	0	54.2222	67.77	5	1	1	5	15	23	0	0	2	0	0	2
ZINC00419826	COc1ccc2c(c1)sc(n2)NC(=O)C3CC3	248.062	150	3	2.6534	4	1	79.46	3	2	0	0.833214	2.23	35.8255	9	10	29	20.2525	19	286	689.05	202.14	3	1	3	13	0.5	4	0	5.24793	1.306	92	C12H12N2O2S	17	0.137931	67.5257	51.22	4	1	1	5	17	29	0	0	3	1	1	1
ZINC00459160	CC(C)NC(=O)c1ccc2ccccc2n1	214.111	273	2	2.373	2	1	41.99	2	2	0	0.703499	2.56	35.2171	10	11	30	18.2429	17	231	721.03	201.856	3	1	5	13	0.444444	4	0	5.08746	2.502	80	C13H14N2O	16	0.1	64.3452	41.99	3	1	1	3	16	30	0	0	2	0	0	1
ZINC00467648	CCC(=O)Nc1ccc2c(c1)[nH]c(=O)[nH]2	205.085	29	11	1.2047	2	3	77.75	2	2	0	0.82026	2.01	29.8387	9	10	26	15.9213	16	215	519.05	183.292	2	3	4	13	0.444444	3	0	5	-0.033	76	C10H11N3O2	15	0.0769231	57.8401	77.75	5	3	1	5	15	26	0	0	2	0	0	1
ZINC00549915	CC(C)C(=O)NCc1[nH]c2ccccc2n1	217.122	50	5	1.8351	2	2	57.78	3	2	0	0.811113	2.34	35.2239	9	10	31	19.9961	17	242	784.04	198.194	3	2	5	9	0.444444	5	0	5.08746	1.271	80	C12H15N3O	16	0.129032	62.7784	57.78	4	2	1	4	16	31	0	0	2	0	0	1
ZINC00569439	CCCn1c(nnn1)NC(=O)c2ccco2	221.091	347	2	0.9284	6	1	85.84	4	2	0	0.902052	1.68	30.2787	10	10	27	17.5393	17	236	544.07	177.089	5	1	3	13	0.444444	5	0	5.08746	1.154	78	C9H11N5O2	16	0.111111	54.7692	85.84	7	1	1	7	16	27	0	0	2	0	0	2
ZINC00610204	CC(=O)Nc1ccc(cc1)OC(=O)N2CCCC2	248.116	146	2	2.2396	3	1	58.64	2	1	0	0.704866	2.34	38.1547	6	6	34	23.9633	19	322	919.05	232.973	4	1	3	13	0.454545	4	0	5.24793	1.349	88	C13H16N2O3	18	0.147059	67.5767	58.64	5	1	2	5	18	34	0	0	2	1	1	0
ZINC00757318	c1ccc(cc1)CC[NH+]2CCC(CC2)C(=O)N	233.165	219	3	0.0093	1	2	47.53	4	1	0	0.75983	2.67	41.6447	6	6	38	24.5753	18	305	1249.03	236.643	2	2	3	6	0.454545	4	0	5.16993	0.96	82	C14H21N2O	17	0.184211	67.6281	47.53	3	3	1	3	17	38	0	0	2	1	1	0
ZINC00784866	Cc1c(sc2c1c(ncn2)N(C)C)C	207.083	285	1	2.37414	4	0	57.26	1	2	0	0.905067	2.12	32.4683	9	10	27	21.1117	15	138	602.04	175.957	3	0	3	10	0.5	5	0	4.90689	1.562	74	C10H13N3S	14	0.148148	61.216	29.02	3	0	0	4	14	27	0	0	2	0	0	2
ZINC01284117	CC(C)c1ccc(cc1)C(=O)NC[C@@H]2CCCO2	247.157	82	2	2.7188	2	1	38.33	4	1	0	0.880297	2.78	43.1067	6	6	39	26.4913	19	323	1294.03	250.415	3	1	4	9	0.454545	6	0	5.24793	3.185	88	C15H21NO2	18	0.205128	71.8382	38.33	3	1	1	3	18	39	1	0	2	1	1	0
ZINC01389433	CC(=O)c1ccc(cc1)N2CCC(CC2)C(=O)N	246.137	174	4	1.5909	3	1	63.4	3	1	0	0.843857	2.56	40.4463	6	6	36	22.9137	19	314	1063.04	241.479	4	1	3	9	0.454545	4	0	5.24793	1.416	90	C14H18N2O2	18	0.166667	70.5779	63.4	4	2	1	4	18	36	0	0	2	1	1	0
ZINC01401994	CC(=O)Nc1ccc(cc1)Oc2ncccn2	229.085	156	2	2.2273	4	1	64.11	3	2	0	0.77672	2.23	33.3587	12	12	28	18.1993	18	300	569.05	201.711	4	1	3	16	0.454545	4	0	5.16993	1.192	82	C12H11N3O2	17	0.0357143	62.8517	64.11	5	1	1	5	17	28	0	0	2	0	0	1
ZINC01511088	CC(=O)Nc1nc(ns1)SC	189.003	302	1	1.2184	5	1	108.42	2	1	0	0.79708	1.35	23.3696	5	5	18	16.4704	11	114	214.06	142.669	4	1	3	8	0.428571	4	0	4.45943	0.455	50	C5H7N3OS2	11	0.111111	45.9937	54.88	4	1	1	6	11	18	0	0	1	0	0	1
ZINC00012163	c1ccc(cc1)CCCC(=O)N2CCOCC2	233.142	185	6	1.8681	2	0	29.54	4	1	0	0.716068	2.67	40.0131	6	6	36	25.6249	18	311	1097.03	233.119	3	0	5	6	0.454545	4	0	5.16993	1.719	80	C14H19NO2	17	0.194444	66.779	29.54	3	0	1	3	17	36	0	0	2	1	1	0
ZINC00047226	COCC(=O)Nc1ccccc1	165.079	27	5	1.2715	2	1	38.33	3	1	0	0.83993	2.12	25.8787	6	6	23	15.5593	12	146	397.03	158.995	3	1	5	9	0.5	4	0	4.58496	0.758	52	C9H11NO2	12	0.0869565	46.9477	38.33	3	1	1	3	12	23	0	0	1	0	0	0
ZINC00102765	c1ccc(c(c1)NC(=S)N)OC(F)(F)F	236.023	143	5	2.2407	2	2	79.37	2	1	1	0.714511	1.57	26.3206	6	6	22	14.3174	15	165	274.07	180.617	2	2	3	11	0.428571	8	0	4.90689	2.395	72	C8H7F3N2OS	15	0.0454545	53.5331	47.28	3	3	0	7	15	22	0	0	1	0	0	0
ZINC00188952	CC(=O)NCCc1ccc(cc1)S(=O)(=O)N	242.073	97	4	0.0126	3	2	97.64	4	1	0	0.729928	1.9	34.4411	6	6	30	22.7389	16	246	660.06	214.587	5	2	5	10	0.5	6	0	5	0.037	76	C10H14N2O3S	16	0.1	60.2029	89.26	5	3	1	6	16	30	0	0	1	0	0	0
ZINC00200753	c1cscc1C[NH+]2CCC(CC2)O	198.095	386	1	0.2877	2	2	52.91	2	1	0	0.7811	2.23	33.0707	5	5	29	21.0913	14	173	744.03	180.245	1	2	0	5	0.5	3	0	4.80735	0.84	64	C10H16NOS	13	0.206897	53.9605	24.67	2	2	0	3	13	29	0	0	2	1	1	1
ZINC00342142	Cc1ccc(cc1)CNC(=O)COC	193.11	85	4	1.25762	2	1	38.33	4	1	0	0.696441	2.34	32.0659	6	6	29	19.9321	14	210	659.03	193.587	3	1	6	6	0.5	6	0	4.80735	1.339	62	C11H15NO2	14	0.137931	54.9017	38.33	3	1	1	3	14	29	0	0	1	0	0	0
ZINC00362817	COCC(=O)NCc1ccccc1	179.095	85	4	0.9492	2	1	38.33	4	1	0	0.597574	2.23	28.9723	6	6	26	17.7457	13	180	520.03	176.291	3	1	6	6	0.444444	5	0	4.70044	0.902	56	C10H13NO2	13	0.115385	50.1647	38.33	3	1	1	3	13	26	0	0	1	0	0	0
ZINC00393697	CCOC(=O)N1CCOCC1	159.09	327	2	0.4751	3	0	38.77	1	0	0	0.603509	1.79	24.4943	0	0	24	20.9817	11	116	466.04	152.003	4	0	5	4	0.428571	3	0	4.45943	0.046	48	C7H13NO3	11	0.25	39.414	38.77	4	0	1	4	11	24	0	0	1	1	1	0
ZINC00580944	CC(=O)Nc1ccc2c(c1)[nH]c(=O)[nH]2	191.069	29	11	0.8146	2	3	77.75	1	2	0	0.756899	1.9	26.7451	9	10	23	13.7349	15	180	394.05	165.996	2	3	3	13	0.5	2	0	4.90689	-0.286	72	C9H9N3O2	14	0.0434783	53.2231	77.75	5	3	1	5	14	23	0	0	2	0	0	1
ZINC01017099	CCC(=O)Nc1ccc(cc1O)C	179.095	33	4	2.04912	2	2	49.33	2	1	1	0.689437	2.23	28.9723	6	6	26	15.8297	13	153	520.03	176.291	2	2	4	10	0.5	5	0	4.70044	1.989	60	C10H13NO2	13	0.115385	51.7645	49.33	3	2	1	3	13	26	0	0	1	0	0	0
ZINC01090577	CNC(=O)CCC1CCCCC1	169.147	310	2	2.0929	1	1	29.1	3	0	0	0.669809	2.34	32.1711	0	0	31	22.3889	12	148	829.02	186.31	2	1	5	3	0.5	4	0	4.58496	2.976	52	C10H19NO	12	0.290323	49.8757	29.1	2	1	1	2	12	31	0	0	1	1	1	0
ZINC01425998	COC(=O)COc1ccc(cc1)C#N	191.058	191	1	1.11008	4	0	59.32	3	1	0	0.673566	2.12	27.1071	6	6	23	15.2889	14	206	347.04	179.809	3	0	5	9	0.5	5	0	4.80735	1.363	62	C10H9NO3	14	0.0869565	48.668	59.32	4	0	0	4	14	23	0	0	1	0	0	0
ZINC01467774	COC(=O)CNC(=O)C1CCCCC1	199.121	317	1	0.8559	3	1	55.4	3	0	0	0.503296	2.12	32.4415	0	0	31	23.0765	14	193	779.04	201.254	4	1	7	3	0.444444	5	0	4.80735	1.326	62	C10H17NO3	14	0.258065	51.6007	55.4	4	1	1	4	14	31	0	0	1	1	1	0
ZINC00065001	CC(C)(C)[NH+]1CC(C1)O	130.123	246	1	-0.9557	1	2	24.67	0	0	0	0.74243	2.01	24.8907	0	0	25	18.8113	9	69	553.02	138.377	1	2	3	0	0.4	5	0	4.16993	0.322	46	C7H16NO	9	0.28	36.4565	24.67	2	2	0	2	9	25	0	0	1	1	1	0
ZINC00200671	CCCC(=O)NCc1[nH]c2ccccc2n1	217.122	50	5	1.9792	2	2	57.78	4	2	0	0.768452	2.34	35.2239	9	10	31	19.9961	17	265	784.04	198.194	3	2	6	9	0.5	5	0	5.08746	1.547	78	C12H15N3O	16	0.129032	62.8484	57.78	4	2	1	4	16	31	0	0	2	0	0	1
ZINC00265206	c1cc2c(ccc(c2nc1)O)C[NH+]3CCCC3	229.134	266	2	1.1191	2	2	37.56	2	2	0	0.610373	2.67	38.9775	10	11	34	21.2245	19	240	1024.03	210.751	1	2	0	11	0.5	3	0	5.24793	1.817	90	C14H17N2O	17	0.147059	67.0425	37.56	3	2	0	3	17	34	0	0	3	1	1	1
ZINC00330858	CNc1ncccn1	109.064	247	2	0.5183	3	1	37.81	1	1	0	0.712758	1.68	16.7676	6	6	15	10.9524	8	60	169.03	96.8608	3	1	2	7	0.4	2	0	4	0.103	34	C5H7N3	8	0.0666667	31.5787	37.81	3	1	0	3	8	15	0	0	1	0	0	1
ZINC00555297	C1CN(CCC1C(=O)N)C(=O)CC#N	195.101	320	3	-0.37602	3	1	87.19	2	0	0	0.595255	1.9	29.4123	0	0	27	18.1077	14	186	547.05	191.889	5	1	5	3	0.444444	2	0	4.80735	-1.648	64	C9H13N3O2	14	0.222222	48.7284	87.19	5	2	2	5	14	27	0	0	1	1	1	0
ZINC01562012	C[NH2+]CCC1CCCCC1	142.16	369	1	1.15	0	1	16.61	3	0	0	0.729177	2.34	30.2759	0	0	30	21.8641	10	107	810.01	164.179	0	1	4	0	0.428571	4	0	4.32193	3.161	42	C9H20N	10	0.3	43.9084	16.61	1	2	0	1	10	30	0	0	1	1	1	0
ZINC00221320	CC1CCC(CC1)[NH2+]C2CCC(CC2)O	212.201	370	2	1.432	1	2	36.84	2	0	0	0.808232	2.67	42.1186	0	0	41	28.4234	16	240	1554.02	229.797	1	2	0	0	0.5	4	0	5	2.859	74	C13H26NO	15	0.317073	61.6082	36.84	2	3	0	2	15	41	0	0	2	2	2	0
ZINC00313537	c1cc(ccc1NC(=O)C2CC2)N3CCOCC3	246.137	174	4	1.8717	3	1	41.57	3	1	0	0.888999	2.56	40.4463	6	6	36	25.1917	20	339	1138.04	231.759	4	1	3	10	0.454545	3	0	5.32193	1.411	94	C14H18N2O2	18	0.194444	70.8277	41.57	4	1	1	4	18	36	0	0	3	2	2	0
ZINC00359137	c1ccc(cc1)C(=O)Nc2ccc3c(c2)cccn3	248.095	24	4	3.4871	2	1	41.99	2	3	0	0.726651	2.89	39.1635	16	17	31	16.0565	21	356	747.03	222.578	3	1	3	19	0.454545	2	0	5.39232	3.096	98	C16H12N2O	19	0	76.1382	41.99	3	1	1	3	19	31	0	0	3	0	0	1
ZINC00397103	Cc1cc(cc(c1)NC(=O)NCc2ccco2)C	244.121	47	4	3.21814	2	2	54.27	3	2	0	0.881124	2.56	39.1127	11	11	34	21.6853	19	306	919.04	227.943	3	2	4	10	0.5	5	0	5.24793	2.197	88	C14H16N2O2	18	0.0882353	70.4824	54.27	4	2	2	4	18	34	0	0	2	0	0	1
ZINC00405332	Cc1c(c(no1)c2ccc(cc2)F)C(=O)NC	234.08	93	1	2.14872	3	1	55.13	2	2	0	0.614127	2.23	32.8157	11	11	28	16.7623	18	242	569.05	199.418	2	1	4	14	0.444444	5	0	5.16993	2.322	86	C12H11FN2O2	17	0.0714286	60.0242	55.13	4	1	1	5	17	28	0	0	2	0	0	1
ZINC00408628	CC(CO)(CO)NC(=O)Nc1ccccc1	224.116	21	5	0.5514	3	4	81.59	4	1	0	0.846252	2.12	34.6347	6	6	32	19.7693	16	225	784.05	213.374	5	4	6	10	0.444444	7	0	5	-0.048	74	C11H16N2O3	16	0.125	61.173	81.59	5	4	2	5	16	32	0	0	1	0	0	0
ZINC00418028	c1cc(oc1)c2nnc(s2)NC(=O)C3CC3	235.042	300	1	2.1466	5	1	96.26	3	2	0	0.779685	1.9	31.4051	10	10	25	16.9729	18	255	489.06	178.544	4	1	3	13	0.444444	3	0	5.16993	1.406	86	C10H9N3O2S	16	0.12	58.9647	68.02	5	1	1	6	16	25	0	0	3	1	1	2
ZINC00515009	CC(=O)Nc1ccc(cc1)N2CC[NH+](CC2)C	234.161	182	4	-0.0203	2	2	36.78	2	1	0	0.856298	2.45	40.3179	6	6	37	26.7821	18	294	1172.04	230.344	3	2	3	10	0.454545	4	0	5.16993	1.089	84	C13H20N3O	17	0.162162	69.5794	36.78	4	2	1	4	17	37	0	0	2	1	1	0
ZINC00575186	COc1ccc(cc1)NCc2ccc(cc2)F	231.106	26	5	3.4464	2	1	21.26	4	2	0	0.858853	2.67	36.4341	12	12	31	19.0839	18	324	752.03	214.223	1	1	2	8	0.5	6	0	5.16993	3.454	82	C14H14FNO	17	0.0645161	66.7207	21.26	2	1	0	3	17	31	0	0	2	0	0	0
ZINC00578068	Cc1ccc(cc1)CC(=O)NC[C@@H]2CCCO2	233.142	82	2	1.83272	2	1	38.33	4	1	0	0.813598	2.67	40.0131	6	6	36	24.3049	18	308	1097.03	233.119	3	1	4	6	0.454545	5	0	5.16993	2.029	82	C14H19NO2	17	0.194444	66.8667	38.33	3	1	1	3	17	36	1	0	2	1	1	0
ZINC00845899	CCn1c2ccccc2nc1NC(=O)C	203.106	151	3	2.0146	3	1	46.92	2	2	0	0.885104	2.23	32.1303	9	10	28	19.1297	16	172	631.04	180.898	3	1	3	12	0.428571	4	0	5	1.79	76	C11H13N3O	15	0.107143	59.7107	46.92	4	1	1	4	15	28	0	0	2	0	0	1
ZINC01361032	COc1ccc(cc1)CNC(=O)c2csnn2	249.057	90	1	1.4767	5	1	92.35	4	2	0	0.828215	2.01	34.4987	11	11	28	19.1593	18	306	569.06	205.56	4	1	4	8	0.454545	5	0	5.16993	1.765	82	C11H11N3O2S	17	0.0714286	64.0732	64.11	5	1	1	6	17	28	0	0	2	0	0	1
ZINC01428295	c1cc(sc1)CCNC(=O)C2CCCCC2	237.119	344	2	2.9871	2	1	57.34	4	1	0	0.779682	2.56	40.3511	5	5	35	24.6689	17	270	1056.03	228.178	2	1	5	5	0.5	4	0	5.08746	2.553	76	C13H19NOS	16	0.228571	67.6077	29.1	2	1	1	3	16	35	0	0	2	1	1	1
ZINC01501734	C[NH+]1CCN(CC1)C(=O)c2ccc3cc[nH]c3c2	244.145	222	1	0.1384	1	2	40.54	1	2	0	0.75528	2.56	40.7443	9	10	36	24.5957	20	307	1138.04	221.747	2	2	2	12	0.5	2	0	5.32193	1.206	96	C14H18N3O	18	0.138889	70.8229	40.54	4	2	1	4	18	36	0	0	3	1	1	1
ZINC01558832	CC(C)NC(=O)c1ccc(cc1)NC(=O)NC	235.132	76	3	1.5761	2	3	70.23	3	1	0	0.7481	2.23	37.3595	6	6	34	22.4805	17	277	884.05	230.24	5	3	5	13	0.454545	6	0	5.08746	1.204	78	C12H17N3O2	17	0.117647	67.1226	70.23	5	3	3	5	17	34	0	0	1	0	0	0
ZINC00042133	C1C[C@H](CC=C1)C[NH+]2CCC(CC2)C(=O)N	223.181	220	1	0.1229	1	2	47.53	3	0	0	0.736798	2.56	41.2182	0	0	39	26.7618	17	259	1360.03	235.52	2	2	3	3	0.5	3	0	5.08746	1.021	78	C13H23N2O	16	0.25641	63.9631	47.53	3	3	1	3	16	39	1	0	2	1	2	0
ZINC00042939	CCOc1ccc(cc1)C[NH+]2CCC(CC2)O	236.165	211	6	0.6249	2	2	33.9	4	1	0	0.795288	2.67	42.0134	6	6	39	27.2866	18	318	1328.03	237.073	1	2	3	7	0.5	6	0	5.16993	1.786	82	C14H22NO2	17	0.205128	67.2525	33.9	3	2	0	3	17	39	0	0	2	1	1	0
ZINC00084757	Cc1cc(nc(n1)Nc2cccc(c2)O)C	215.106	277	3	2.54264	4	2	58.04	2	2	0	0.768903	2.34	33.8903	12	12	29	17.5117	17	219	660.04	195.557	3	2	0	14	0.5	5	0	5.08746	1.893	80	C12H13N3O	16	0.0689655	62.8955	58.04	4	2	0	4	16	29	0	0	2	0	0	1
ZINC00106888	COC(=O)c1ccc(cc1)S(=O)(=O)N	215.025	65	2	0.1206	4	1	94.84	2	1	0	0.875594	1.68	27.2891	6	6	23	18.5289	14	168	347.06	177.789	5	1	4	13	0.5	5	0	4.80735	0.417	68	C8H9NO4S	14	0.0434783	49.1547	86.46	5	2	0	6	14	23	0	0	1	0	0	0
ZINC00106897	CCOC(=O)Nc1ccc2c(c1)c(=O)n(cn2)C	247.096	44	1	1.5019	5	1	73.22	2	2	0	0.851606	2.12	35.4943	10	11	31	22.0037	19	291	718.06	224.038	4	1	5	15	0.5	5	0	5.24793	1.68	90	C12H13N3O3	18	0.0967742	67.6287	73.22	6	1	1	6	18	31	0	0	2	0	0	1
ZINC00114345	Cc1c(nc(=O)[nH]n1)Nc2ccc(cc2)N(C)C	245.128	37	5	1.28292	5	2	73.91	3	2	0	0.746351	2.12	37.4239	12	12	33	21.9761	19	295	850.06	228.451	4	2	3	15	0.5	6	0	5.24793	1.98	90	C12H15N5O	18	0.0909091	71.4414	73.91	6	2	0	6	18	33	0	0	2	0	0	1
ZINC00115751	CS(=O)(=O)N1CC[NH+](CC1)Cc2ccco2	245.096	334	3	-1.0603	3	1	63.34	3	1	0	0.665249	1.9	36.4415	5	5	33	30.2765	17	240	916.06	208.822	3	1	3	5	0.444444	4	0	5.08746	-0.452	82	C10H17N2O3S	16	0.181818	59.5255	54.96	5	1	0	6	16	33	0	0	2	1	1	1
ZINC00115866	c1ccc(c(c1)C(=O)N)NC(=O)C[NH+]2CCCC2	248.14	216	6	-0.5973	2	3	76.63	4	1	0	0.882724	2.34	39.7863	6	6	36	22.9137	19	277	1063.05	236.498	4	3	3	12	0.444444	4	0	5.24793	0.464	88	C13H18N3O2	18	0.138889	68.3873	76.63	5	4	2	5	18	36	0	0	2	1	1	0
ZINC00130112	Cc1ccccc1OCC(=O)Nc2ccccc2	241.11	145	5	3.01252	2	1	38.33	4	2	0	0.799922	2.78	39.1059	12	12	33	19.9321	19	328	850.03	231.605	2	1	4	9	0.454545	5	0	5.24793	2.901	86	C15H15NO2	18	0.0606061	71.7457	38.33	3	1	1	3	18	33	0	0	2	0	0	0
ZINC00134027	c1ccc(cc1)C(=O)Nc2ccc(cc2)C(=O)N	240.09	24	4	2.0378	2	2	72.19	3	2	0	0.858323	2.56	36.4455	12	12	30	15.0345	19	320	655.04	222.67	4	2	3	18	0.454545	3	0	5.24793	1.88	88	C14H12N2O2	18	0	69.3551	72.19	4	3	2	4	18	30	0	0	2	0	0	0
ZINC00140659	CC1(CC(CC(N1O)(C)C)NC(=O)N(C)C)C	243.195	311	1	1.6684	3	2	55.81	1	0	0	0.762689	2.23	42.6938	0	0	42	31.5882	17	209	1492.05	251.686	3	2	4	4	0.5	8	0	5.08746	0.754	88	C12H25N3O2	17	0.261905	67.0242	55.81	5	2	2	5	17	42	0	0	1	1	1	0
ZINC00176144	c1ccc(cc1)SCC[NH+]2CCOCC2	224.111	213	13	0.6938	2	1	38.97	4	1	0	0.792751	2.45	37.9243	6	6	33	25.1937	16	252	946.03	212.2	1	1	3	6	0.5	4	0	5	1.993	70	C12H18NOS	15	0.181818	63.5487	13.67	2	1	0	3	15	33	0	0	2	1	1	0
ZINC00178847	Cc1ccc(c([nH+]1)CCc2ccc(cc2)OC)[O-]	243.126	158	1	1.67652	2	0	46.43	4	2	0	0.856359	2.78	40.4395	12	12	35	22.1185	19	324	990.03	234.242	0	1	2	7	0.454545	7	0	5.24793	4.074	88	C15H17NO2	18	0.114286	67.5827	46.43	3	1	0	3	18	35	0	0	2	0	0	1
ZINC00183163	c1cc(ccc1C[NH+]2CCOCC2)C(F)(F)F	246.111	213	13	1.1205	1	1	13.67	2	1	0	0.830428	2.23	34.6949	6	6	32	23.2431	18	278	817.05	211.894	1	1	3	6	0.5	6	0	5.16993	2.139	86	C12H15F3NO	17	0.1875	56.6637	13.67	2	1	0	5	17	32	0	0	2	1	1	0
ZINC00207410	COc1ccc(cc1O)C[NH+]2CCCCCC2	236.165	211	6	1.3597	2	2	33.9	3	1	0	0.802111	2.67	42.0134	6	6	39	27.2866	18	275	1328.03	237.073	0	2	2	8	0.5	5	0	5.16993	2.077	82	C14H22NO2	17	0.205128	67.5275	33.9	3	2	0	3	17	39	0	0	2	1	1	0
ZINC00208680	CC[C@H](C#CC[NH+]1CCCCC1)OC(=O)C	224.165	375	1	0.4003	2	1	30.74	3	0	1	0.658319	2.56	40.2534	0	0	38	28.2446	16	252	1204.03	243.034	2	1	7	3	0.5	6	0	5	2.011	70	C13H22NO2	16	0.263158	63.0357	30.74	3	1	0	3	16	38	1	0	1	1	1	0
ZINC00211528	CN(CCO)S(=O)(=O)c1ccc(cc1)N	230.073	196	1	-0.1184	4	2	92.01	4	1	1	0.785073	1.79	32.6811	6	6	29	23.1009	15	196	631.06	199.928	5	2	6	11	0.444444	7	0	4.90689	-0.416	72	C9H14N2O3S	15	0.103448	57.756	83.63	5	3	0	6	15	29	0	0	1	0	0	0
ZINC00212327	CC(=O)N1CCC(CC1)[NH2+]CCc2ccccc2	247.181	185	6	0.8034	1	1	36.92	4	1	0	0.710104	2.78	44.7382	6	6	41	28.0818	19	353	1458.03	253.939	2	1	3	6	0.5	5	0	5.24793	1.989	86	C15H23N2O	18	0.195122	72.2144	36.92	3	2	1	3	18	41	0	0	2	1	1	0
ZINC00991307	CC(=O)Nc1nnc(s1)SCC(=O)[O-]	231.985	301	5	-0.6615	7	1	148.55	4	1	1	0.767735	1.24	26.0668	5	5	20	15.9732	14	189	218.08	173.591	6	1	4	8	0.444444	6	0	4.80735	-0.062	64	C6H6N3O3S2	14	0.1	49.9437	95.01	6	1	1	8	14	20	0	0	1	0	0	1
ZINC01385196	c1cc(ccc1CN2CCC(=O)N2)Cl	210.056	99	1	1.5769	2	1	32.34	2	1	0	0.886533	2.12	30.1167	6	6	25	14.7233	15	205	494.04	181.352	3	1	0	6	0.444444	3	0	4.90689	1.443	70	C10H11ClN2O	14	0.12	54.6217	32.34	3	1	1	4	14	25	0	0	2	1	1	0
ZINC01387541	CCNC(=O)Oc1ccc(cc1)c2csnn2	249.057	122	1	2.3134	5	1	92.35	3	2	0	0.756717	2.01	34.4987	11	11	28	19.1593	18	301	569.06	205.56	4	1	5	15	0.454545	5	0	5.16993	2.523	82	C11H11N3O2S	17	0.0714286	65.0457	64.11	5	1	1	6	17	28	0	0	2	0	0	1
ZINC01392581	c1ccc(cc1)c2ccccc2NNC(=S)N	243.083	55	2	2.5137	2	3	82.17	3	2	2	0.537982	2.45	37.7483	12	12	30	14.6917	18	246	689.04	219.935	3	3	4	17	0.444444	5	0	5.16993	3.65	82	C13H13N3S	17	0	75.4218	50.08	3	4	0	4	17	30	0	0	2	0	0	0
ZINC01392609	CC(C)(C)c1ccc(cc1)NNC(=S)N	223.114	54	5	2.1442	2	3	82.17	2	1	2	0.581218	2.23	36.8955	6	6	32	19.0645	15	207	814.04	216.509	3	3	4	11	0.444444	8	0	4.90689	3.527	72	C11H17N3S	15	0.125	68.6858	50.08	3	4	0	4	15	32	0	0	1	0	0	0
ZINC01393275	COC(=O)[C@@H]1C[C@H](CN1C(=O)c2ccco2)O	239.079	333	4	0.028	5	1	79.98	2	1	0	0.801073	2.01	33.1383	5	5	30	21.9397	18	220	689.06	207.601	5	1	4	8	0.5	5	0	5.16993	-0.449	86	C11H13NO5	17	0.166667	56.1723	79.98	6	1	1	6	17	30	2	0	2	1	1	1
ZINC01393277	COC(=O)[C@@H]1C[C@@H](CN1C(=O)c2ccco2)O	239.079	333	4	0.028	5	1	79.98	2	1	0	0.822365	2.01	33.1383	5	5	30	21.9397	18	220	689.06	207.601	5	1	4	8	0.5	5	0	5.16993	-0.449	86	C11H13NO5	17	0.166667	56.1723	79.98	6	1	1	6	17	30	2	0	2	1	1	1
ZINC01393801	CC(=O)NCc1cc(no1)c2ccc(cc2)OC	246.1	121	2	1.9863	4	1	64.36	4	2	0	0.614033	2.34	36.8211	11	11	32	20.7549	19	334	783.05	219.437	2	1	4	12	0.5	6	0	5.24793	1.925	88	C13H14N2O3	18	0.09375	66.0117	64.36	5	1	1	5	18	32	0	0	2	0	0	1
ZINC01403330	c1c(nns1)C(=O)NO	144.995	366	1	-0.3429	5	2	103.35	1	1	2	0.544677	1.13	15.0844	5	5	12	7.17762	9	71	72.06	98.3583	3	2	4	9	0.4	2	0	4.16993	-0.298	40	C3H3N3O2S	9	0	29.1617	75.11	5	2	1	6	9	12	0	0	1	0	0	1
ZINC01405437	C#Cc1ccc(cc1)OCc2ccccc2	208.089	138	8	3.2469	1	0	9.23	3	2	1	0.793741	3	35.2035	12	12	28	15.0345	17	284	601.01	209.182	0	0	2	9	0.454545	3	0	5.08746	4.145	76	C15H12O	16	0.0357143	65.151	9.23	1	0	0	1	16	28	0	0	2	0	0	0
ZINC01406508	c1ccn(c1)CCNC(=O)C(F)(F)Cl	222.037	348	1	1.4359	2	1	34.03	4	1	0	0.885288	1.68	26.3771	5	5	23	16.2629	14	183	347.06	173.888	2	1	6	5	0.5	7	0	4.80735	1.459	66	C8H9ClF2N2O	14	0.130435	48.2417	34.03	3	1	1	6	14	23	0	0	1	0	0	1
ZINC00005608	CC(=O)NCCc1cccc2c1cc(cc2)OC	243.126	121	2	2.527	2	1	38.33	4	2	0	0.70971	2.78	40.4395	10	11	35	22.1185	19	285	990.03	234.242	2	1	5	11	0.5	6	0	5.24793	2.759	88	C15H17NO2	18	0.114286	72.8877	38.33	3	1	1	3	18	35	0	0	2	0	0	0
ZINC00030082	CC(=O)Nc1ccc(cc1)C(=O)Nn2cnnc2	245.091	159	2	0.6204	5	2	88.91	3	2	0	0.751454	1.9	33.7987	11	11	29	17.2413	19	320	594.07	206.408	6	2	3	17	0.454545	4	0	5.24793	1.259	88	C11H11N5O2	18	0.0344828	64.4589	88.91	7	2	2	7	18	29	0	0	2	0	0	1
ZINC00030267	C[C@H]1CCCCN1C(=O)N2CCOCC2	212.152	325	2	1.313	2	0	32.78	0	0	0	0.833727	2.23	36.4999	0	0	35	28.6981	16	196	1086.04	211.037	4	0	2	4	0.5	1	0	5	0.558	74	C11H20N2O2	15	0.285714	57.807	32.78	4	0	2	4	15	35	1	0	2	2	2	0
ZINC00030382	CC(C)c1ccc(cc1)NC(=O)N2CCOCC2	248.152	43	7	2.6741	2	1	41.57	2	1	0	0.891009	2.56	41.7799	6	6	38	27.3781	19	320	1215.04	244.115	4	1	3	10	0.454545	4	0	5.24793	2.063	88	C14H20N2O2	18	0.184211	71.9417	41.57	4	1	2	4	18	38	0	0	2	1	1	0
ZINC00030531	c1cnc(nc1)NC(=O)Cc2ccc(cc2)Cl	247.051	98	3	2.3112	3	1	54.88	3	2	0	0.584278	2.23	34.0699	12	12	27	15.6101	18	303	512.05	208.132	4	1	3	9	0.454545	4	0	5.16993	1.862	82	C12H10ClN3O	17	0.037037	65.8177	54.88	4	1	1	5	17	27	0	0	2	0	0	1
ZINC00034155	CCn1ccc(n1)C[NH2+]C	140.119	367	1	-0.4038	2	1	34.43	3	1	0	0.822859	1.9	24.9551	5	5	24	17.2849	10	101	486.03	135.407	1	1	3	5	0.428571	5	0	4.32193	0.599	44	C7H14N3	10	0.166667	39.4544	34.43	3	2	0	3	10	24	0	0	1	0	0	1
ZINC00035394	c1cc2c(cc1C(=O)N3CCCCCC3)OCO2	247.121	188	4	2.4315	3	0	38.77	1	1	0	0.817962	2.56	39.4815	6	6	35	25.3545	20	285	1063.04	229.552	2	0	2	11	0.444444	1	0	5.32193	2.28	94	C14H17NO3	18	0.2	66.9365	38.77	4	0	1	4	18	35	0	0	3	1	2	0
ZINC00040636	Cn1c(c(cn1)NC(=O)c2ccccc2)C(=O)N	244.096	81	1	0.7713	4	2	90.01	3	2	0	0.863031	2.12	35.1255	11	11	30	17.0145	19	271	655.06	212.708	5	2	3	17	0.444444	4	0	5.24793	1.222	90	C12H12N4O2	18	0.0333333	66.1211	90.01	6	3	2	6	18	30	0	0	2	0	0	1
ZINC00050930	CC(C)COc1ccc(cc1)[C@@H]2C(=O)NC(=O)N2	248.116	119	2	1.6019	3	2	67.43	4	1	2	0.592048	2.34	38.1547	6	6	34	22.6433	19	316	919.05	232.973	4	2	4	7	0.454545	6	0	5.24793	1.679	90	C13H16N2O3	18	0.147059	66.1904	67.43	5	2	3	5	18	34	1	0	2	1	1	0
ZINC00060967	COc1ccc(cc1)CNC(=O)CC#N	204.09	91	2	1.22508	3	1	62.12	4	1	0	0.827809	2.23	31.1655	6	6	27	17.3125	15	244	519.04	199.311	3	1	6	7	0.454545	5	0	4.90689	0.647	66	C11H12N2O2	15	0.111111	55.0707	62.12	4	1	1	4	15	27	0	0	1	0	0	0
ZINC00081358	Cc1cc(no1)NC(=O)CSc2ccccc2	248.062	113	4	2.71382	4	1	80.43	4	2	0	0.789765	2.23	35.8255	11	11	29	18.9325	18	308	628.05	211.86	2	1	4	8	0.454545	5	0	5.16993	2.52	82	C12H12N2O2S	17	0.0689655	67.0357	55.13	4	1	1	5	17	29	0	0	2	0	0	1
ZINC00090853	Cc1c(cco1)C(=O)N2CCc3c2cccc3	227.095	193	2	2.79092	2	0	33.45	1	2	0	0.747614	2.67	36.0123	11	11	30	19.0657	19	237	752.03	204.589	2	0	2	14	0.5	2	0	5.24793	1.822	92	C14H13NO2	17	0.1	65.2675	33.45	3	0	1	3	17	30	0	0	3	0	1	1
ZINC00091989	C1CCC(CC1)NC(=O)CC#N	166.111	304	1	1.34898	2	1	52.89	2	0	0	0.78014	2.12	28.1771	0	0	26	17.5829	12	146	544.03	174.738	3	1	5	3	0.5	2	0	4.58496	0.85	52	C9H14N2O	12	0.269231	45.2457	52.89	3	1	1	3	12	26	0	0	1	1	1	0
ZINC00119496	c1ccc(c(c1)C(=O)N)NC(=O)c2ccncc2	241.085	24	4	1.4328	3	2	85.08	3	2	0	0.9023	2.34	35.1187	12	12	29	15.2613	19	272	594.05	216.37	5	2	3	18	0.444444	3	0	5.24793	1.057	88	C13H11N3O2	18	0	67.1501	85.08	5	3	2	5	18	29	0	0	2	0	0	1
ZINC00128333	c1ccc(cc1)OCC(=O)Nc2cccc(c2)F	245.085	145	5	2.8432	2	1	38.33	4	2	0	0.743216	2.56	35.9025	12	12	30	17.8555	19	330	655.04	220.377	2	1	4	9	0.454545	5	0	5.24793	2.836	86	C14H12FNO2	18	0.0333333	66.9667	38.33	3	1	1	4	18	30	0	0	2	0	0	0
ZINC00128548	Cc1cc(no1)C(=O)NCC(=O)OC	198.064	342	2	-0.11418	5	1	81.43	3	1	0	0.81027	1.68	26.1559	5	5	24	17.3401	14	192	394.06	170.276	4	1	7	8	0.444444	6	0	4.80735	0.006	64	C8H10N2O4	14	0.125	45.5892	81.43	6	1	1	6	14	24	0	0	1	0	0	1
ZINC00136098	Cn1ccc(n1)C(=O)Nc2cccc(c2)C(=O)[O-]	244.072	58	4	0.0359	5	1	87.05	3	2	0	0.852958	2.12	33.4939	11	11	28	16.4461	19	294	535.06	209.183	5	1	3	17	0.5	5	0	5.24793	0.62	90	C12H10N3O3	18	0.0357143	61.9337	87.05	6	1	1	6	18	28	0	0	2	0	0	1
ZINC00141883	c1ccc(cc1)NS(=O)(=O)c2ccc(cc2)N	248.062	142	2	2.0696	3	2	80.57	3	2	1	0.654223	2.23	35.8255	12	12	29	19.5945	18	268	628.05	211.86	4	2	3	17	0.5	4	0	5.16993	1.898	86	C12H12N2O2S	17	0	68.1049	72.19	4	3	0	5	17	29	0	0	2	0	0	0
ZINC00186837	c1c(c(=O)[nH]c(=O)[nH]1)NC2CCCCC2	209.116	358	2	0.8078	3	3	77.75	2	1	0	0.884478	2.01	32.5059	6	6	30	20.2941	16	219	751.05	199.465	1	3	0	9	0.444444	2	0	5	1.724	74	C10H15N3O2	15	0.2	58.1791	77.75	5	3	0	5	15	30	0	0	2	1	1	1
ZINC00196534	c1ccc(cc1)[C@@H]2C[C@H]2C(=O)Nc3nccs3	244.067	102	2	2.8853	3	1	70.23	3	2	0	0.841387	2.45	36.7835	11	11	29	18.3365	19	293	689.04	208.009	3	1	3	8	0.5	3	0	5.24793	1.434	90	C13H12N2OS	17	0.103448	68.0337	41.99	3	1	1	4	17	29	2	0	3	1	1	1
ZINC00198524	COc1cc(cc(c1)OC)C(=O)Nn2cnnc2	248.091	159	2	0.6792	6	1	78.27	4	2	0	0.87577	1.9	34.1675	11	11	30	20.5485	19	269	655.07	206.838	4	1	3	16	0.444444	6	0	5.24793	1.835	88	C11H12N4O3	18	0.0666667	63.2592	78.27	7	1	1	7	18	30	0	0	2	0	0	1
ZINC00204342	Cc1c(sc(n1)NC(=O)OC)C(=O)N(C)C	243.068	287	1	1.33162	5	1	99.77	2	1	0	0.743921	1.68	33.1143	5	5	29	24.2837	16	215	601.07	208.288	6	1	4	12	0.444444	7	0	5	-0.259	76	C9H13N3O3S	16	0.137931	60.8962	71.53	6	1	2	7	16	29	0	0	1	0	0	1
ZINC00227879	CC(C)C(=O)N1CCC(CC1)Cc2ccccc2	245.178	185	6	3.1237	1	0	20.31	3	1	0	0.738634	3	45.3982	6	6	41	28.0818	19	319	1458.02	258.92	2	0	4	6	0.454545	5	0	5.24793	3.215	88	C16H23NO	18	0.219512	74.288	20.31	2	0	1	2	18	41	0	0	2	1	1	0
ZINC00236021	C[NH+]1CCN(CC1)C(=O)Nc2ccccc2	220.145	43	7	0.0488	1	2	36.78	1	1	0	0.863805	2.34	37.2243	6	6	34	24.5957	17	257	985.04	213.048	3	2	3	10	0.5	2	0	5.08746	0.542	78	C12H18N3O	16	0.147059	63.6544	36.78	4	2	2	4	16	34	0	0	2	1	1	0
ZINC00249566	COCc1nnc(s1)NC(=O)c2ccccc2	249.057	295	2	1.9368	5	1	92.35	4	2	0	0.865202	2.01	34.4987	11	11	28	19.1593	18	298	569.06	205.56	5	1	3	14	0.454545	5	0	5.16993	1.985	82	C11H11N3O2S	17	0.0714286	65.0172	64.11	5	1	1	6	17	28	0	0	2	0	0	1
ZINC00253736	Cc1cc(nc(c1)NC(=O)Nc2ccccc2)C	241.122	17	1	3.34244	2	2	54.02	2	2	0	0.857629	2.56	38.7439	12	12	33	19.9961	19	301	850.04	227.513	4	2	3	16	0.5	4	0	5.24793	2.71	88	C14H15N3O	18	0.0606061	72.7944	54.02	4	2	2	4	18	33	0	0	2	0	0	1
ZINC00266573	CC(C)Oc1ccc(cc1)[C@@H]2CC(=O)NC2	219.126	120	1	2.0773	2	1	38.33	3	1	0	0.822463	2.56	36.9195	6	6	33	22.1185	17	254	916.03	215.823	2	1	3	7	0.5	5	0	5.08746	1.866	80	C13H17NO2	16	0.181818	62.5737	38.33	3	1	1	3	16	33	1	0	2	1	1	0
ZINC00283686	CCc1nnc(s1)NC(=O)c2cnccn2	235.053	296	2	1.1428	6	1	108.9	3	2	0	0.859034	1.68	31.0431	11	11	25	17.6969	17	258	436.07	184.172	6	1	3	14	0.5	4	0	5.08746	0.341	78	C9H9N5OS	16	0.08	59.2722	80.66	6	1	1	7	16	25	0	0	2	0	0	2
ZINC00330495	CC(=O)Nc1nc2ccc(cc2s1)C(=O)NC	249.057	149	3	1.6143	4	2	99.33	2	2	0	0.880322	2.01	34.4987	9	10	28	18.8613	18	263	569.06	205.56	5	2	4	15	0.5	4	0	5.16993	0.59	86	C11H11N3O2S	17	0.0714286	67.3139	71.09	5	2	2	6	17	28	0	0	2	0	0	1
ZINC00339915	c1cc(oc1)C(=O)NCCc2ccc(cc2)F	233.085	97	4	2.3912	2	1	42.24	4	2	0	0.799827	2.45	34.1425	11	11	29	17.8555	18	312	628.04	205.717	2	1	5	8	0.454545	5	0	5.16993	2.156	82	C13H12FNO2	17	0.0689655	61.1452	42.24	3	1	1	4	17	29	0	0	2	0	0	1
ZINC00355878	CCn1cc(cn1)CNC(=O)c2cccnc2	230.117	94	1	1.228	4	1	59.81	4	2	0	0.851537	2.23	35.6571	11	11	31	20.2229	18	304	752.05	206.554	4	1	4	9	0.454545	5	0	5.16993	0.838	82	C12H14N4O	17	0.0967742	63.3082	59.81	5	1	1	5	17	31	0	0	2	0	0	2
ZINC00369375	c1cc(oc1)C(=O)NC(=S)N2CCOCC2	240.057	314	1	0.6265	4	1	86.8	1	1	1	0.827029	1.9	33.1075	5	5	28	21.6885	17	241	601.06	202.231	4	1	5	11	0.444444	3	0	5.08746	0.433	78	C10H12N2O3S	16	0.142857	61.1642	54.71	5	1	1	6	16	28	0	0	2	1	1	1
ZINC00371249	Cc1ccc(cc1)CNC(=O)c2c(ccs2)C	245.087	87	2	3.29494	2	1	57.34	3	2	0	0.872958	2.67	39.4439	11	11	32	20.2961	18	285	817.03	226.665	2	1	4	8	0.5	5	0	5.16993	2.817	84	C14H15NOS	17	0.09375	71.4052	29.1	2	1	1	3	17	32	0	0	2	0	0	1
ZINC00372122	C[C@@H]1C[C@H]1C(=O)NCCc2ccc(cc2)Cl	237.092	97	4	2.6547	1	1	29.1	4	1	0	0.885879	2.56	37.6307	6	6	32	19.5293	17	289	849.03	222.244	2	1	5	6	0.454545	6	0	5.08746	2.914	80	C13H16ClNO	16	0.1875	65.4367	29.1	2	1	1	3	16	32	2	0	2	1	1	0
ZINC00382952	CC(C)c1ccc(cc1)C(=O)Nc2nncs2	247.078	295	2	2.9138	4	1	83.12	3	2	0	0.846106	2.23	36.7903	11	11	30	19.4297	18	277	689.05	214.066	4	1	3	14	0.5	5	0	5.16993	4.057	84	C12H13N3OS	17	0.1	68.3932	54.88	4	1	1	5	17	30	0	0	2	0	0	1
ZINC00409927	COc1ccc(cc1)NCc2ccccc2O	229.11	26	5	3.0129	3	2	41.49	4	2	0	0.892736	2.67	37.3459	12	12	32	18.9741	18	303	817.03	216.946	1	2	2	8	0.454545	6	0	5.16993	2.887	82	C14H15NO2	17	0.0625	68.4275	41.49	3	2	0	3	17	32	0	0	2	0	0	0
ZINC00418316	CCOc1ccc(cc1)NC(=O)c2cnccn2	243.101	22	4	2.1276	4	1	64.11	4	2	0	0.881306	2.34	36.4523	12	12	31	20.3857	19	341	718.05	219.007	4	1	3	16	0.5	5	0	5.24793	0.916	86	C13H13N3O2	18	0.0645161	67.5962	64.11	5	1	1	5	18	31	0	0	2	0	0	1
ZINC00418341	COc1ccc(cc1)CNC(=O)c2cnccn2	243.101	23	1	1.4152	4	1	64.11	4	2	0	0.876004	2.34	36.4523	12	12	31	20.3857	19	347	718.05	219.007	4	1	4	9	0.5	5	0	5.24793	0.637	86	C13H13N3O2	18	0.0645161	66.1962	64.11	5	1	1	5	18	31	0	0	2	0	0	1
ZINC00433682	c1cnc(cn1)C(=O)NCCC2=CCCCC2	231.137	365	1	2.0969	3	1	54.88	4	1	0	0.847213	2.45	38.3175	6	6	34	22.8425	18	311	953.04	226.39	4	1	5	9	0.454545	4	0	5.16993	1.17	80	C13H17N3O	17	0.176471	65.5332	54.88	4	1	1	4	17	34	0	0	2	0	1	1
ZINC00438357	c1ccc(cc1)CCC(=O)NN2CCOCC2	234.137	309	1	0.9826	3	1	41.57	4	1	0	0.887157	2.45	38.6863	6	6	35	23.8717	18	309	1024.04	226.819	4	1	4	6	0.454545	4	0	5.16993	0.789	80	C13H18N2O2	17	0.171429	65.2977	41.57	4	1	1	4	17	35	0	0	2	1	1	0
ZINC00447355	CC(C)C(=O)Nc1ccc(cc1)N2CCCCC2	246.173	174	4	3.2714	2	1	32.34	3	1	0	0.788767	2.78	44.0714	6	6	40	27.6486	19	317	1375.03	252.621	3	1	4	10	0.454545	5	0	5.24793	3.015	88	C15H22N2O	18	0.2	75.9737	32.34	3	1	1	3	18	40	0	0	2	1	1	0
ZINC00460647	C1CCC(CC1)CCC(=O)N2CCOCC2	225.173	329	1	2.2057	2	0	29.54	3	0	0	0.769161	2.56	40.9202	0	0	39	29.9978	17	265	1360.03	234.632	3	0	4	3	0.5	3	0	5.08746	2.718	76	C13H23NO2	16	0.307692	63.208	29.54	3	0	1	3	16	39	0	0	2	2	2	0
ZINC00474223	c1ccc(cc1)NC(=O)NCc2ccc(cc2)F	244.101	10	9	3.1474	1	2	41.13	3	2	0	0.832452	2.56	36.8673	12	12	31	17.6927	19	351	718.04	222.583	3	2	4	10	0.5	4	0	5.24793	2.787	86	C14H13FN2O	18	0.0322581	68.7004	41.13	3	2	2	4	18	31	0	0	2	0	0	0
ZINC00476364	COC(=O)Nc1cccc(c1)NC(=O)OC	224.08	11	6	2.0432	4	2	76.66	2	1	0	0.86286	1.9	31.0095	6	6	28	20.1865	16	236	544.06	202.232	6	2	4	14	0.5	6	0	5	0.872	72	C10H12N2O4	16	0.0714286	58.4974	76.66	6	2	2	6	16	28	0	0	1	0	0	0
ZINC00476532	COc1ccc(cc1)CNC(=O)[C@@H]2CCCO2	235.121	89	3	1.4904	3	1	47.56	4	1	0	0.889099	2.45	37.7215	6	6	34	24.0345	18	306	953.04	224.613	3	1	4	7	0.454545	5	0	5.16993	1.426	82	C13H17NO3	17	0.176471	63.8147	47.56	4	1	1	4	17	34	1	0	2	1	1	0
ZINC00476615	COC(=O)c1ccc(cc1)NC(=O)C2CCCC2	247.121	67	4	2.6019	3	1	55.4	3	1	0	0.701189	2.56	39.4815	6	6	35	23.0765	19	320	990.04	239.272	4	1	4	12	0.454545	5	0	5.24793	2.556	88	C14H17NO3	18	0.171429	68.3692	55.4	4	1	1	4	18	35	0	0	2	1	1	0
ZINC00536699	c1ccc(cc1)CCNc2c[nH]c(=O)[nH]c2=O	231.101	359	2	0.7178	3	3	77.75	4	2	0	0.846961	2.23	34.6923	12	12	30	18.1077	18	307	689.05	215.247	1	3	3	9	0.454545	4	0	5.16993	1.764	82	C12H13N3O2	17	0.0666667	66.3191	77.75	5	3	0	5	17	30	0	0	2	0	0	1
ZINC00610949	c1cc(c(cc1F)F)NC(=O)Nn2cnnc2	239.062	162	3	1.3319	4	2	71.84	2	2	0	0.837081	1.57	27.9236	11	11	24	14.3164	18	279	353.08	177.798	5	2	3	15	0.5	4	0	5.16993	1.816	84	C9H7F2N5O	17	0	54.7594	71.84	6	2	2	8	17	24	0	0	2	0	0	1
ZINC00611720	Cc1ccc(c(c1)NC(=O)Nn2cnnc2)OC	247.107	162	3	1.37072	5	2	81.07	3	2	0	0.74743	1.9	35.1323	11	11	31	20.3857	19	277	718.07	209.045	5	2	3	16	0.444444	5	0	5.24793	1.846	88	C11H13N5O2	18	0.0645161	66.1324	81.07	7	2	2	7	18	31	0	0	2	0	0	1
ZINC00620739	CC1(CC(=CC(=O)C1)Nc2c[nH]c(=O)[nH]c2=O)C	249.111	358	2	0.7481	4	3	94.82	2	1	0	0.811533	2.12	36.8279	6	6	33	21.2521	19	270	850.06	237.574	2	3	0	13	0.444444	4	0	5.24793	1.141	94	C12H15N3O3	18	0.151515	67.4111	94.82	6	3	0	6	18	33	0	0	2	0	1	1
ZINC00804618	c1cc(ccc1C(=O)N)NC(=O)[C@@H]2CCCO2	234.1	31	3	0.903	3	2	81.42	3	1	0	0.885354	2.23	35.0611	6	6	31	19.1369	18	279	752.05	215.677	5	2	3	12	0.5	3	0	5.16993	0.254	84	C12H14N2O3	17	0.129032	62.5636	81.42	5	3	2	5	17	31	1	0	2	1	1	0
ZINC00815043	CC[C@H](C)NC(=O)c1cc(on1)c2ccccc2	244.121	103	2	2.8699	3	1	55.13	4	2	0	0.794688	2.56	39.1127	11	11	34	21.0253	19	312	919.04	227.943	2	1	6	14	0.454545	6	0	5.24793	3.261	88	C14H16N2O2	18	0.117647	69.1582	55.13	4	1	1	4	18	34	1	0	2	0	0	1
ZINC00859957	CC1CCN(CC1)C(=O)CCCc2ccccc2	245.178	185	6	3.2678	1	0	20.31	4	1	0	0.863575	3	45.3982	6	6	41	28.0818	19	351	1458.02	258.92	2	0	5	6	0.5	5	0	5.24793	3.491	86	C16H23NO	18	0.219512	74.358	20.31	2	0	1	2	18	41	0	0	2	1	1	0
ZINC00984048	c1cc(ccc1NC(=O)Nc2cnccn2)Cl	248.046	10	9	2.774	3	2	66.91	2	2	0	0.809527	2.01	32.7431	12	12	26	15.1769	18	303	457.06	201.832	5	2	3	16	0.454545	3	0	5.16993	1.328	82	C11H9ClN4O	17	0	66.1254	66.91	5	2	2	6	17	26	0	0	2	0	0	1
ZINC01000907	Cn1cc(cn1)CNC(=O)c2ccco2	205.085	346	3	0.9431	4	1	60.06	3	2	0	0.787779	2.01	29.8387	10	10	26	17.5393	16	229	519.05	172.392	3	1	4	8	0.444444	4	0	5	0.367	74	C10H11N3O2	15	0.0769231	53.0862	60.06	5	1	1	5	15	26	0	0	2	0	0	2
ZINC01001271	Cn1ccc(n1)C(=O)NC[C@@H]2CCCO2	209.116	343	1	0.3289	4	1	56.15	3	1	0	0.887712	2.01	32.5059	5	5	30	21.9121	16	227	751.05	188.565	4	1	4	8	0.444444	4	0	5	0.273	74	C10H15N3O2	15	0.2	54.5152	56.15	5	1	1	5	15	30	1	0	2	1	1	1
ZINC01002703	CCn1cc(cn1)C(=O)NCc2ccc(cc2)F	247.112	92	1	1.9721	3	1	46.92	4	2	0	0.831191	2.34	36.8741	11	11	32	20.1059	19	344	783.05	218.921	3	1	4	8	0.5	6	0	5.24793	2.214	88	C13H14FN3O	18	0.09375	65.4712	46.92	4	1	1	5	18	32	0	0	2	0	0	1
ZINC01019104	Cn1c(ccn1)C(=O)NCc2cccs2	221.062	346	3	1.4116	4	1	75.16	3	2	0	0.897666	2.01	31.9367	10	10	26	17.9033	16	210	519.05	182.111	3	1	4	8	0.5	4	0	5	0.787	74	C10H11N3OS	15	0.0769231	58.6972	46.92	4	1	1	5	15	26	0	0	2	0	0	2
ZINC01051980	CC(C)(C)c1ccc(cc1)C(=O)Nc2ccon2	244.121	112	3	3.2244	3	1	55.13	2	2	0	0.894496	2.56	39.1127	11	11	34	21.0253	19	296	919.04	227.943	2	1	3	14	0.5	6	0	5.24793	3.857	92	C14H16N2O2	18	0.117647	69.5982	55.13	4	1	1	4	18	34	0	0	2	0	0	1
ZINC01053560	CC[C@H](c1ccccc1)C(=O)Nc2cnccn2	241.122	256	1	2.6089	3	1	54.88	4	2	0	0.907995	2.56	38.7439	12	12	33	20.6561	19	291	850.04	227.513	4	1	5	9	0.5	5	0	5.24793	1.812	86	C14H15N3O	18	0.0909091	70.1357	54.88	4	1	1	4	18	33	1	0	2	0	0	1
ZINC01053636	Cc1c(c(on1)C)C(=O)NCCC2=CCCCC2	248.152	364	1	2.91174	3	1	55.13	4	1	0	0.828359	2.56	41.7799	5	5	38	25.3981	19	310	1215.04	244.115	2	1	5	8	0.5	6	0	5.24793	2.642	88	C14H20N2O2	18	0.210526	69.4782	55.13	4	1	1	4	18	38	0	0	2	0	1	1
ZINC01053645	Cc1cc(no1)C(=O)NCc2cccs2	222.046	342	2	1.97452	4	1	83.37	3	2	0	0.863	2.01	30.9719	10	10	25	16.7461	16	227	466.05	179.904	2	1	4	8	0.444444	4	0	5	1.075	74	C10H10N2O2S	15	0.08	56.7292	55.13	4	1	1	5	15	25	0	0	2	0	0	2
ZINC01054476	COC(=O)NCc1cc2cc(ccc2[nH]1)Cl	238.051	14	1	2.6773	2	2	54.12	2	2	0	0.746928	2.12	32.6787	9	10	27	16.6393	17	255	544.05	193.902	3	2	5	9	0.5	5	0	5.08746	2.376	80	C11H11ClN2O2	16	0.0740741	62.5534	54.12	4	2	1	5	16	27	0	0	2	0	0	1
ZINC01055122	CCOC(=O)Nc1c(ccs1)C(=O)N	214.041	294	1	1.4154	4	2	109.66	3	1	0	0.84857	1.68	28.2539	5	5	24	17.0441	14	173	394.06	179.995	5	2	5	12	0.5	5	0	4.80735	0.533	64	C8H10N2O3S	14	0.0833333	53.4816	81.42	5	3	2	6	14	24	0	0	1	0	0	1
ZINC01055144	Cc1cccc2c1nc(s2)NC(=O)OC	222.046	149	3	2.78302	4	1	79.46	1	2	0	0.877933	2.01	30.9719	9	10	25	18.0661	16	200	466.05	179.904	4	1	4	13	0.5	4	0	5	1.582	76	C10H10N2O2S	15	0.08	60.3847	51.22	4	1	1	5	15	25	0	0	2	0	0	1
ZINC01055644	CC[C@@H](c1ccccc1)C(=O)Nc2ccon2	230.106	112	3	2.8069	3	1	55.13	4	2	0	0.901712	2.45	36.0191	11	11	31	18.8389	18	252	752.04	210.647	2	1	5	8	0.444444	5	0	5.16993	2.635	82	C13H14N2O2	17	0.0967742	64.6067	55.13	4	1	1	4	17	31	1	0	2	0	0	1
ZINC01056028	CCc1ccc(s1)C(=O)NCc2cnn(c2)C	249.094	346	3	1.974	4	1	75.16	4	2	0	0.855794	2.23	38.1239	10	10	32	22.2761	18	301	817.05	216.703	3	1	4	8	0.454545	6	0	5.16993	0.833	84	C12H15N3OS	17	0.125	68.0752	46.92	4	1	1	5	17	32	0	0	2	0	0	2
ZINC01056223	CCC(=O)Nc1nnc(s1)c2ccncc2	234.058	70	1	1.9486	5	1	96.01	3	2	0	0.848781	1.9	32.3699	11	11	26	17.4701	17	254	489.06	190.471	5	1	4	14	0.5	4	0	5.08746	1.501	78	C10H10N4OS	16	0.0769231	62.0607	67.77	5	1	1	6	16	26	0	0	2	0	0	2
ZINC01056321	c1cc(cc(c1)Cl)C(=O)Nc2ccon2	222.02	112	3	2.5803	3	1	55.13	2	2	0	0.85637	2.01	28.2516	11	11	22	11.6064	16	203	319.05	173.97	2	1	3	14	0.5	3	0	5	2.662	74	C10H7ClN2O2	15	0	55.9082	55.13	4	1	1	5	15	22	0	0	2	0	0	1
ZINC01063912	c1cc(cnc1)NC(=O)c2cnn3c2nccc3	239.081	253	1	1.3766	5	1	72.18	2	3	0	0.69044	2.12	33.4231	15	16	27	16.0769	20	307	535.06	189.021	5	1	3	18	0.5	2	0	5.32193	0.176	94	C12H9N5O	18	0	65.1772	72.18	6	1	1	6	18	27	0	0	3	0	0	3
ZINC01304656	C[C@@H](c1ccc(cc1)N2CCOCC2)[NH3+]	207.15	130	2	0.8261	2	1	40.11	2	1	0	0.870861	2.45	36.7911	6	6	34	23.3469	16	218	1015.03	204.688	2	1	3	7	0.444444	4	0	5	2.133	74	C12H19N2O	15	0.176471	60.7771	40.11	3	3	0	3	15	34	1	0	2	1	1	0
ZINC01466469	c1cc2c(cc1CNC(=O)[C@@H]3CCCO3)OCO2	249.1	89	3	1.2105	4	1	56.79	3	1	0	0.812035	2.34	37.1899	6	6	33	23.7641	20	322	919.05	221.047	3	1	4	8	0.5	3	0	5.32193	1	94	C13H15NO4	18	0.181818	63.3857	56.79	5	1	1	5	18	33	1	0	3	1	2	0
ZINC01466487	C1CCC(CC1)CCC(=O)NN2CCOCC2	240.184	308	2	1.7103	3	1	41.57	4	0	0	0.696738	2.45	42.687	0	0	41	30.431	18	309	1492.04	245.629	4	1	4	4	0.454545	4	0	5.16993	2.357	80	C13H24N2O2	17	0.292683	66.3437	41.57	4	1	1	4	17	41	0	0	2	2	2	0
ZINC01466524	COC(=O)N1CCN(CC1)c2ccc(cc2)F	238.112	179	5	1.7141	3	0	32.78	1	1	0	0.747543	2.23	35.4829	6	6	32	24.4351	18	292	817.05	215.591	4	0	4	7	0.454545	4	0	5.16993	2.115	84	C12H15FN2O2	17	0.15625	62.591	32.78	4	0	1	5	17	32	0	0	2	1	1	0
ZINC01469218	C[C@@H]1CCCCN1C(=O)c2cnccn2	205.122	362	1	1.4912	3	0	46.09	1	1	0	0.803588	2.23	33.4639	6	6	30	21.9761	16	196	751.04	194.434	4	0	2	9	0.5	2	0	5	0.478	74	C11H15N3O	15	0.2	56.3815	46.09	4	0	1	4	15	30	1	0	2	1	1	1
ZINC01476177	CC(C)COc1ccc(cc1)C(=O)N2CCCC2	247.157	188	4	2.9574	2	0	29.54	4	1	0	0.79935	2.78	43.1067	6	6	39	27.8113	19	320	1294.03	250.415	2	0	4	10	0.454545	6	0	5.24793	3.068	88	C15H21NO2	18	0.205128	71.9125	29.54	3	0	1	3	18	39	0	0	2	1	1	0
ZINC01516906	Cc1c(cco1)C(=O)Nc2ccncc2	202.074	252	1	2.23532	3	1	55.13	2	2	0	0.856232	2.23	29.8319	11	11	25	15.7861	16	205	466.04	176.055	3	1	3	14	0.5	3	0	5	0.582	74	C11H10N2O2	15	0.04	55.6352	55.13	4	1	1	4	15	25	0	0	2	0	0	2
ZINC00102761	c1cc(ccc1NC(=S)N)OC(F)(F)F	236.023	143	5	2.2407	2	2	79.37	2	1	1	0.767183	1.57	26.3206	6	6	22	14.3174	15	205	274.07	180.617	2	2	3	11	0.444444	8	0	4.90689	2.395	72	C8H7F3N2OS	15	0.0454545	53.5331	47.28	3	3	0	7	15	22	0	0	1	0	0	0
ZINC00109796	COc1ccc(cc1)C(=O)C2CC[NH2+]CC2	220.134	135	1	0.8513	2	1	42.91	3	1	0	0.792648	2.56	37.5863	6	6	34	22.5517	17	253	985.03	217.141	1	1	2	9	0.5	4	0	5.08746	1.746	78	C13H18NO2	16	0.176471	61.7079	42.91	3	2	0	3	16	34	0	0	2	1	1	0
ZINC00133425	c1ccc(cc1)C(c2ccccc2)[NH+]3CC(C3)O	240.139	245	1	1.0354	1	2	24.67	3	2	0	0.805157	3	42.0643	12	12	36	20.9977	20	246	1138.02	231.709	1	2	0	6	0.5	4	0	5.32193	2.307	94	C16H18NO	18	0.111111	71.4305	24.67	2	2	0	2	18	36	0	0	3	1	1	0
ZINC00154213	Cc1cc(nc(n1)Nc2ccc(cc2)N)C	214.122	277	3	2.41924	4	2	63.83	2	2	1	0.712464	2.34	34.8551	12	12	30	17.9449	17	240	721.04	197.764	4	2	0	14	0.444444	5	0	5.08746	1.482	80	C12H14N4	16	0.0666667	65.6431	63.83	4	3	0	4	16	30	0	0	2	0	0	1
ZINC00158945	c1cnc(nc1)N2CCC(CC2)CO	193.122	183	1	0.6853	4	1	49.25	2	1	0	0.760455	2.12	31.7039	6	6	29	21.0181	15	201	718.04	179.775	4	1	2	7	0.444444	3	0	4.90689	0.815	68	C10H15N3O	14	0.206897	54.0548	49.25	4	1	0	4	14	29	0	0	2	1	1	1
ZINC00159007	c1ccc(c(c1)CO)N2CCOCC2	193.11	178	4	1.0155	3	1	32.7	2	1	0	0.719408	2.34	32.0659	6	6	29	20.2941	15	164	718.03	183.867	3	1	2	7	0.428571	3	0	4.90689	1.14	68	C11H15NO2	14	0.172414	55.3968	32.7	3	1	0	3	14	29	0	0	2	1	1	0
ZINC00167238	CCOC(=O)c1ccc(cc1F)F	186.049	227	1	2.1415	2	0	26.3	2	1	0	0.657241	2.01	23.8923	6	6	21	14.0257	13	151	285.04	160.134	2	0	5	9	0.5	6	0	4.70044	2.703	60	C9H8F2O2	13	0.0952381	42.3145	26.3	2	0	0	4	13	21	0	0	1	0	0	0
ZINC00347833	COc1cc(cc(c1OC)OC)C(=O)[O-]	211.061	129	1	0.0759	5	0	67.82	4	1	0	0.774413	2.01	28.9447	6	6	26	19.6893	15	157	466.05	190.347	2	0	3	12	0.428571	8	0	4.90689	0.633	70	C10H11O5	15	0.115385	50.4285	67.82	5	0	0	5	15	26	0	0	1	0	0	0
ZINC00386890	C[NH+]1CCN(CC1)C(=O)Nc2ccc(cc2)F	238.136	43	7	0.1879	1	2	36.78	1	1	0	0.68722	2.23	37.1145	6	6	34	24.7055	18	297	953.05	219.116	3	2	3	10	0.454545	3	0	5.16993	0.703	84	C12H17FN3O	17	0.147059	63.6124	36.78	4	2	2	5	17	34	0	0	2	1	1	0
ZINC00387415	CN(C)C(=O)OCCn1ccnc1	183.101	327	2	0.5813	4	0	47.36	3	1	0	0.872793	1.79	27.6523	5	5	26	22.3657	13	168	520.05	166.329	4	0	6	5	0.5	6	0	4.70044	0.079	58	C8H13N3O2	13	0.153846	47.262	47.36	5	0	1	5	13	26	0	0	1	0	0	1
ZINC00439367	c1cc(ccc1CC(=O)Nc2ccc(cc2)F)F	247.081	98	3	3.146	1	1	29.1	3	2	0	0.795611	2.56	34.9907	12	12	29	16.0493	19	343	594.04	217.654	2	1	3	9	0.5	5	0	5.24793	3.127	88	C14H11F2NO	18	0.0344828	65.1337	29.1	2	1	1	4	18	29	0	0	2	0	0	0
ZINC00455317	CC(C)CNC(=O)c1ccc2ccccc2c1	227.131	80	2	3.2256	1	1	29.1	3	2	0	0.826037	2.89	39.6375	10	11	34	20.2025	18	272	953.02	225.452	2	1	6	13	0.5	5	0	5.16993	3.771	84	C15H17NO	17	0.117647	71.1192	29.1	2	1	1	2	17	34	0	0	2	0	0	0
ZINC00481335	c1c(cncc1Br)C(=O)ON	215.953	261	1	0.8746	4	1	65.21	1	1	1	0.752575	1.57	20.748	6	6	16	8.97003	11	101	146.05	137.388	2	1	4	10	0.5	4	0	4.45943	0.124	50	C6H5BrN2O2	11	0	41.5399	65.21	4	2	0	5	11	16	0	0	1	0	0	1
ZINC00482440	c1cc(oc1)C(=O)OCc2ccc(cc2)Cl	236.024	110	1	3.29	3	0	39.44	3	2	0	0.885594	2.34	31.7071	11	11	25	15.0489	17	266	436.04	195.358	2	0	4	8	0.5	5	0	5.08746	2.99	78	C12H9ClO3	16	0.04	59.2795	39.44	3	0	0	4	16	25	0	0	2	0	0	1
ZINC00483065	Cc1cc(no1)NC(=O)CCC2CCCCC2	236.152	310	2	3.28202	3	1	55.13	4	1	0	0.8798	2.45	40.0199	5	5	37	25.3981	18	308	1172.04	229.456	2	1	4	8	0.454545	5	0	5.16993	3.825	82	C13H20N2O2	17	0.243243	65.6787	55.13	4	1	1	4	17	37	0	0	2	1	1	1
ZINC00483632	COc1ccc(cc1)CC(=O)Nc2nncs2	249.057	123	1	1.7279	5	1	92.35	4	2	0	0.762484	2.01	34.4987	11	11	28	19.1593	18	304	569.06	205.56	4	1	3	8	0.454545	5	0	5.16993	2.379	82	C11H11N3O2S	17	0.0714286	65.2367	64.11	5	1	1	6	17	28	0	0	2	0	0	1
ZINC00493235	c1ccc(cc1)OCC(=O)N2CCCC2	205.11	189	4	1.6878	2	0	29.54	3	1	0	0.765624	2.45	33.8259	6	6	30	21.2521	16	230	751.03	198.527	2	0	4	7	0.444444	3	0	5	1.757	72	C12H15NO2	15	0.166667	57.751	29.54	3	0	1	3	15	30	0	0	2	1	1	0
ZINC00527883	c1cc(ccc1NC(=O)C[NH+]2CCCC2)F	223.125	216	6	0.4429	1	2	33.54	3	1	0	0.883715	2.34	35.3477	6	6	32	21.6323	17	264	849.04	208.119	2	2	3	9	0.5	4	0	5.08746	1.309	78	C12H16FN2O	16	0.15625	59.8274	33.54	3	2	1	4	16	32	0	0	2	1	1	0
ZINC00559767	CCC(=O)Nc1ccc(cc1)N2CCC(CC2)C	246.173	174	4	3.2714	2	1	32.34	3	1	0	0.729566	2.78	44.0714	6	6	40	27.6486	19	335	1375.03	252.621	3	1	4	10	0.5	5	0	5.24793	3.23	88	C15H22N2O	18	0.2	75.9737	32.34	3	1	1	3	18	40	0	0	2	1	1	0
ZINC00570841	C[C@@H](C[NH2+]Cc1ccc2c(c1)OCO2)O	210.113	231	6	-0.1405	3	2	55.3	4	1	0	0.833861	2.23	33.5347	6	6	31	21.3233	16	228	814.04	193.976	1	2	5	8	0.444444	6	0	5	0.886	74	C11H16NO3	15	0.16129	54.7422	55.3	4	3	0	4	15	31	1	0	2	0	1	0
ZINC00797157	CNC(=O)c1ccccc1NC(=O)c2ccco2	244.085	45	5	1.8915	3	2	71.34	3	2	0	0.890204	2.34	35.4875	11	11	30	18.2705	19	267	655.05	216.8	4	2	4	17	0.444444	4	0	5.24793	1.527	88	C13H12N2O3	18	0.0333333	66.4934	71.34	5	2	2	5	18	30	0	0	2	0	0	1
ZINC00804572	Cc1c(cccc1Cl)NC(=O)[C@@H]2CCCO2	239.071	28	1	2.76592	2	1	38.33	2	1	0	0.888801	2.34	35.3391	6	6	30	19.2589	17	218	721.04	213.738	3	1	3	9	0.5	4	0	5.08746	2.215	80	C12H14ClNO2	16	0.166667	63.7927	38.33	3	1	1	4	16	30	1	0	2	1	1	0
ZINC00815042	CC[C@@H](C)NC(=O)c1cc(on1)c2ccccc2	244.121	103	2	2.8699	3	1	55.13	4	2	0	0.901202	2.56	39.1127	11	11	34	21.0253	19	312	919.04	227.943	2	1	6	14	0.454545	6	0	5.24793	3.261	88	C14H16N2O2	18	0.117647	69.1582	55.13	4	1	1	4	18	34	1	0	2	0	0	1
ZINC00999680	c1cc(ccc1NC(=O)CC#N)OC(F)(F)F	244.046	12	3	2.43738	3	1	62.12	3	1	0	0.801702	1.79	27.7426	6	6	24	15.4554	17	281	304.07	200.218	3	1	5	10	0.454545	7	0	5.08746	1.755	80	C10H7F3N2O2	17	0.0833333	51.9847	62.12	4	1	1	7	17	24	0	0	1	0	0	0
ZINC01019092	c1cc(ccc1C(=O)N)NC(=O)c2cnccn2	242.08	22	4	0.8278	4	2	97.97	3	2	0	0.835936	2.12	33.7919	12	12	28	15.4881	19	320	535.06	210.071	6	2	3	18	0.454545	3	0	5.24793	-0.535	88	C12H10N4O2	18	0	64.9451	97.97	6	3	2	6	18	28	0	0	2	0	0	1
ZINC01388549	c1ccc(cc1)Nc2nnc3n2nc(cc3)Cl	245.047	56	1	2.5213	5	1	55.11	2	3	0	0.628414	2.01	32.3743	15	16	25	13.1257	19	267	457.06	180.783	4	1	0	16	0.444444	3	0	5.24793	4.245	90	C11H8ClN5	17	0	65.5167	55.11	5	1	0	6	17	25	0	0	3	0	0	2
ZINC00127805	CC(=O)Nc1ccc(cc1)C#N	160.064	30	3	1.51668	2	1	52.89	1	1	0	0.775005	2.12	24.1763	6	6	20	11.0237	12	140	268.03	155.929	3	1	3	11	0.5	2	0	4.58496	0.999	54	C9H8N2O	12	0.05	45.4607	52.89	3	1	1	3	12	20	0	0	1	0	0	0
ZINC00333236	c1cc(cnc1)C[NH2+]C[C@@H]2CCC=CC2	203.155	236	3	1.5013	1	1	29.5	4	1	0	0.705338	2.67	37.7491	6	6	34	22.0909	16	252	1015.02	210.557	1	1	3	6	0.5	4	0	5	2.323	70	C13H19N2	15	0.176471	61.2144	29.5	2	2	0	2	15	34	1	0	2	0	1	1
ZINC00337587	CNC(=O)OCc1nccn1C	169.085	286	1	0.2761	4	1	56.15	2	1	0	0.859852	1.68	24.5587	5	5	23	18.8593	12	136	397.05	149.033	4	1	5	5	0.428571	5	0	4.58496	-0.155	54	C7H11N3O2	12	0.130435	42.4527	56.15	5	1	1	5	12	23	0	0	1	0	0	1
ZINC00481303	c1ccc(c(c1)C(=O)N)Nc2cccc(c2)Cl	246.056	15	2	3.1825	2	2	55.12	3	2	0	0.834791	2.45	35.3967	12	12	28	13.4033	18	232	569.04	214.431	3	2	3	16	0.5	4	0	5.16993	3.172	84	C13H11ClN2O	17	0	69.6946	55.12	3	3	1	4	17	28	0	0	2	0	0	0
ZINC00237751	CCCc1cc(=O)oc2c1ccc(c2)OC(=O)C	246.089	136	2	2.6708	4	0	56.51	3	2	2	0.582762	2.56	37.1831	10	11	32	21.0529	19	273	783.04	234.429	1	0	3	14	0.5	6	0	5.24793	3.905	90	C14H14O4	18	0.125	67.788	56.51	4	0	0	4	18	32	0	0	2	0	0	1
ZINC00315188	COC(=O)c1ccc(o1)C[NH+]2CCCC2	210.113	341	3	0.2449	3	1	43.88	3	1	0	0.807856	2.23	33.5347	5	5	31	23.6013	16	220	814.04	193.976	2	1	4	8	0.444444	5	0	5	0.766	74	C11H16NO3	15	0.193548	53.6822	43.88	4	1	0	4	15	31	0	0	2	1	1	1
ZINC00513005	c1ccc2c(c1)[nH]c(n2)NCc3ccco3	213.09	47	4	2.768	3	2	53.85	3	3	0	0.730905	2.34	32.5567	14	15	27	16.5813	18	260	601.04	172.301	2	2	2	10	0.444444	3	0	5.16993	1.862	84	C12H11N3O	16	0.037037	62.1284	53.85	4	2	0	4	16	27	0	0	3	0	0	2
ZINC00513006	c1ccc(cc1)CCNc2[nH]c3ccccc3n2	237.127	49	5	3.2175	2	2	40.71	4	3	0	0.759717	2.78	39.7019	15	16	33	19.0381	20	351	919.03	212.762	2	2	3	10	0.454545	4	0	5.32193	3.323	92	C15H15N3	18	0.0606061	74.7294	40.71	3	2	0	3	18	33	0	0	3	0	0	1
ZINC00521701	c1ccc(cc1)CCNC(=O)c2ccc(=O)oc2	243.09	97	4	1.6123	3	1	59.31	4	2	0	0.884949	2.56	36.8143	12	12	31	18.7037	19	351	718.04	234	2	1	5	10	0.5	4	0	5.24793	2.32	86	C14H13NO3	18	0.0645161	67.4572	59.31	4	1	1	4	18	31	0	0	2	0	0	1
ZINC00521977	CC1(C[C@H](CCO1)C(=O)NCc2ccccc2)C	247.157	86	2	2.508	2	1	38.33	3	1	0	0.675424	2.78	43.1067	6	6	39	26.4913	19	303	1294.03	250.415	3	1	4	6	0.5	5	0	5.24793	2.313	90	C15H21NO2	18	0.205128	71.0437	38.33	3	1	1	3	18	39	1	0	2	1	1	0
ZINC00526080	CC(C)C(=O)Nc1nnn(n1)C	169.096	204	2	-0.1954	5	1	72.7	2	1	0	0.831475	1.46	24.1967	5	5	23	15.6233	12	130	397.06	144.941	5	1	4	8	0.428571	5	0	4.58496	0.297	56	C6H11N5O	12	0.173913	42.2657	72.7	6	1	1	6	12	23	0	0	1	0	0	1
ZINC00529455	c1ccc(cc1)COc2ccccc2C(=O)NN	242.106	138	8	1.8691	3	2	64.35	4	2	3	0.420649	2.56	37.7791	12	12	32	16.8589	19	295	783.04	225.306	3	2	4	11	0.5	5	0	5.24793	2.054	86	C14H14N2O2	18	0.03125	68.8696	64.35	4	3	1	4	18	32	0	0	2	0	0	0
ZINC00541010	C[C@@H](C(=O)OC)NC(=O)N1CCOCC1	216.111	313	3	-0.4103	4	1	67.87	2	0	0	0.699812	1.79	31.9167	0	0	31	25.8793	15	206	751.06	203.745	6	1	7	4	0.444444	5	0	4.90689	-0.679	68	C9H16N2O4	15	0.225806	52.4017	67.87	6	1	2	6	15	31	1	0	1	1	1	0
ZINC00544945	CN(C)c1c(nc(o1)c2ccco2)C#N	203.069	335	1	1.87228	5	0	66.2	2	2	0	0.880871	2.01	28.5051	10	10	24	17.6309	16	176	415.05	169.755	3	0	3	13	0.428571	4	0	5	1.253	76	C10H9N3O2	15	0.0833333	53.247	66.2	5	0	0	5	15	24	0	0	2	0	0	2
ZINC00068281	c1cc(cc(c1)F)NCc2ccc3c(c2)OCO3	245.085	26	5	3.1665	3	1	30.49	3	2	0	0.836063	2.56	35.9025	12	12	30	18.8135	20	321	718.04	210.657	1	1	2	8	0.5	4	0	5.32193	3.028	94	C14H12FNO2	18	0.0666667	66.2917	30.49	3	1	0	4	18	30	0	0	3	0	1	0
ZINC00074321	c1cc(cnc1)Nc2nnc(s2)C(F)(F)F	246.019	250	1	2.6955	5	1	78.94	2	2	0	0.882538	1.46	26.385	11	11	21	14.655	17	239	244.08	167.928	4	1	3	12	0.444444	6	0	5.08746	2.191	82	C8H5F3N4S	16	0.047619	52.4307	50.7	4	1	0	8	16	21	0	0	2	0	0	2
ZINC00077366	CN(C)C(=O)Nc1cnccc1C(F)(F)F	233.078	249	2	2.1939	2	1	45.23	1	1	0	0.832075	1.68	28.2809	6	6	26	19.4591	16	181	436.07	190.401	4	1	4	10	0.428571	7	0	5	0.731	78	C9H10F3N3O	16	0.115385	51.9447	45.23	4	1	2	7	16	26	0	0	1	0	0	1
ZINC00082712	COC(=O)c1c(ccs1)NC(=O)C2CC2	225.046	350	2	1.8832	4	1	83.64	3	1	0	0.830317	2.01	31.3407	5	5	26	18.7973	16	196	519.05	191.234	4	1	4	11	0.5	5	0	5	1.234	76	C10H11NO3S	15	0.153846	57.0122	55.4	4	1	1	5	15	26	0	0	2	1	1	1
ZINC00088862	Cc1nnc(s1)Nc2cccc(c2)F	209.042	11	6	2.72922	4	1	66.05	2	2	0	0.808168	1.9	27.9313	11	11	22	14.2087	15	188	347.05	162.092	3	1	0	12	0.5	4	0	4.90689	2.905	70	C9H8FN3S	14	0.0454545	54.3287	37.81	3	1	0	5	14	22	0	0	2	0	0	1
ZINC00109117	CCOC(=O)c1c(nc(s1)c2cnccn2)C	249.057	361	1	2.08522	6	0	93.21	3	2	0	0.747573	2.01	34.4987	11	11	28	21.1393	18	265	569.06	205.56	5	0	5	14	0.5	6	0	5.16993	0.286	84	C11H11N3O2S	17	0.107143	63.8335	64.97	5	0	0	6	17	28	0	0	2	0	0	2
ZINC00109185	C1COCC[NH+]1Cc2c(snn2)Cl	220.031	384	1	-0.3934	4	1	67.69	2	1	0	0.839004	1.57	28.8367	5	5	24	19.2813	14	158	469.06	165.561	3	1	0	5	0.428571	3	0	4.80735	0.174	64	C7H11ClN3OS	13	0.208333	50.1387	39.45	4	1	0	6	13	24	0	0	2	1	1	1
ZINC00118151	c1cc(ccc1NC(=O)Nc2ccc(cc2)F)F	248.076	10	9	3.6088	1	2	41.13	2	2	0	0.671351	2.34	33.6639	12	12	28	15.6161	19	343	535.05	211.355	3	2	3	16	0.5	4	0	5.24793	2.804	88	C13H10F2N2O	18	0	65.4414	41.13	3	2	2	5	18	28	0	0	2	0	0	0
ZINC00118354	c1ccc(cc1)[C@@H](C[NH+]2CCC(CC2)C(=O)N)O	249.16	219	3	-0.4998	2	3	67.76	4	1	0	0.779736	2.56	42.4467	6	6	39	24.5753	19	320	1294.04	245.434	3	3	3	6	0.454545	5	0	5.24793	0.196	88	C14H21N2O2	18	0.179487	68.8839	67.76	4	4	1	4	18	39	1	0	2	1	1	0
ZINC00125314	COC(=O)c1ccc(s1)c2ccccn2	219.035	257	2	2.5967	4	0	67.43	2	2	0	0.698392	2.23	30.9651	11	11	24	16.3129	16	215	415.04	183.567	3	0	4	14	0.444444	4	0	5	1.422	74	C11H9NO2S	15	0.0416667	58.8895	39.19	3	0	0	4	15	24	0	0	2	0	0	2
ZINC00130404	c1ccc(cc1)[C@@H](C[NH2+][C@@H]2CCCCNC2=O)O	249.16	243	1	-0.0479	2	3	65.94	4	1	0	0.837426	2.56	42.4467	6	6	39	24.5753	19	302	1294.04	245.434	3	3	4	6	0.5	5	0	5.24793	1.179	86	C14H21N2O2	18	0.179487	68.8429	65.94	4	4	1	4	18	39	2	0	2	1	1	0
ZINC00135989	Cc1ccc(cc1)C(=O)O[C@@H]2C[NH+]3CCC2CC3	246.149	228	3	0.82892	2	1	30.74	2	1	0	0.812062	2.78	42.4399	6	6	38	26.0581	20	312	1294.03	239.376	2	1	3	9	0.5	4	0	5.32193	2.654	96	C15H20NO2	18	0.210526	68.6702	30.74	3	1	0	3	18	38	1	0	4	3	3	0
ZINC00139744	C[C@H]1CN(C[C@H](O1)C)c2ccc(cc2C(=O)[O-])N	249.124	60	2	0.2459	5	1	78.62	2	1	1	0.706003	2.34	38.8215	6	6	35	23.7365	19	235	990.05	234.291	5	1	3	11	0.5	6	0	5.24793	1.188	92	C13H17N2O3	18	0.171429	67.4069	78.62	5	2	0	5	18	35	2	0	2	1	1	0
ZINC00141498	Cc1c(c(n(n1)C)C)NC(=O)CC#N	192.101	354	1	0.88912	4	1	70.71	2	1	0	0.695911	1.9	29.0435	5	5	26	17.3765	14	171	494.05	180.559	4	1	5	8	0.5	5	0	4.80735	-0.095	66	C9H12N4O	14	0.153846	51.5417	70.71	5	1	1	5	14	26	0	0	1	0	0	1
ZINC00143194	c1cc(oc1)C[NH+]2CCS(=O)(=O)CC2	216.069	341	3	-0.9071	3	1	60.1	2	1	0	0.642677	1.9	31.5811	5	5	28	25.0169	15	188	659.05	180.529	2	1	0	5	0.5	2	0	4.90689	-0.149	72	C9H14NO3S	14	0.178571	51.7625	51.72	4	1	0	5	14	28	0	0	2	1	1	1
ZINC00144281	CC(=O)Nc1ccccc1C(=O)NN	193.085	29	11	0.2485	3	3	84.22	2	1	3	0.43533	1.9	28.0787	6	6	25	13.2813	14	150	443.05	178.352	5	3	4	13	0.428571	4	0	4.80735	0.112	64	C9H11N3O2	14	0.04	52.3993	84.22	5	4	2	5	14	25	0	0	1	0	0	0
ZINC00145618	CCOC(=O)NCc1ccccc1	179.095	88	2	1.9327	2	1	38.33	3	1	0	0.854838	2.23	28.9723	6	6	26	17.7457	13	180	520.03	176.291	3	1	6	6	0.444444	5	0	4.70044	2.014	56	C10H13NO2	13	0.115385	50.3037	38.33	3	1	1	3	13	26	0	0	1	0	0	0
ZINC00147728	CC(C)c1ccc(cc1)NNC(=O)c2ccno2	245.116	53	3	2.5549	4	2	67.16	4	2	1	0.795173	2.34	37.7859	11	11	33	19.2721	19	327	850.05	221.643	3	2	4	15	0.454545	6	0	5.24793	3.509	88	C13H15N3O2	18	0.0909091	68.1229	67.16	5	2	1	5	18	33	0	0	2	0	0	1
ZINC00147730	CC(C)c1ccc(cc1)NNC(=O)C2CCC2	232.158	51	2	3.0532	2	2	41.13	4	1	1	0.797097	2.67	40.9779	6	6	37	22.8221	18	305	1172.03	235.325	3	2	4	10	0.454545	6	0	5.16993	3.832	84	C14H20N2O	17	0.189189	69.6374	41.13	3	2	1	3	17	37	0	0	2	1	1	0
ZINC00148636	CCc1ccccc1NNC(=O)c2ccccc2	240.126	54	5	3.0059	2	2	41.13	4	2	1	0.76554	2.78	40.0707	12	12	34	18.4493	19	301	919.03	233.812	3	2	4	16	0.5	5	0	5.24793	4.059	86	C15H16N2O	18	0.0588235	73.3509	41.13	3	2	1	3	18	34	0	0	2	0	0	0
ZINC00151365	c1cc(cc(c1)NC(=O)c2ccno2)C(=O)[O-]	231.041	58	4	0.2904	5	1	95.26	3	2	0	0.810044	2.01	29.4356	11	11	24	13.1024	18	256	353.06	189.68	4	1	3	17	0.444444	4	0	5.16993	0.862	84	C11H7N2O4	17	0	55.2287	95.26	6	1	1	6	17	24	0	0	2	0	0	1
ZINC00151442	c1cc(ccc1NNC(=O)C2CCC2)F	208.101	51	2	2.0689	2	2	41.13	3	1	1	0.75987	2.23	31.5873	6	6	28	16.3727	16	246	631.04	189.505	3	2	4	10	0.5	4	0	5	2.588	74	C11H13FN2O	15	0.142857	55.5064	41.13	3	2	1	4	15	28	0	0	2	1	1	0
ZINC00151485	c1ccc(c(c1)NNC(=O)c2ccno2)F	221.06	53	3	1.5706	4	2	67.16	3	2	1	0.795332	1.9	28.3953	11	11	24	12.8227	17	245	385.06	175.823	3	2	4	15	0.444444	4	0	5.08746	2.265	78	C10H8FN3O2	16	0	53.9919	67.16	5	2	1	6	16	24	0	0	2	0	0	1
ZINC00151494	c1ccc(cc1)C(=O)NNc2ccccc2F	230.086	54	5	2.5826	2	2	41.13	3	2	1	0.79085	2.45	33.7737	12	12	28	14.1863	18	282	569.04	205.287	3	2	4	16	0.5	4	0	5.16993	3.53	82	C13H11FN2O	17	0	63.9309	41.13	3	2	1	4	17	28	0	0	2	0	0	0
ZINC00153559	CC(=O)Nc1ccc(cn1)NC(=O)c2ccco2	245.08	45	5	1.8853	4	2	84.23	3	2	0	0.848478	2.12	34.1607	11	11	29	18.4973	19	322	594.06	210.501	5	2	3	17	0.454545	4	0	5.24793	0.423	88	C12H11N3O3	18	0.0344828	65.2019	84.23	6	2	2	6	18	29	0	0	2	0	0	2
ZINC00155226	Cc1cc(no1)C(=O)Nc2ccc3c(c2)cc[nH]3	241.085	39	1	2.71662	3	2	70.92	2	3	0	0.674386	2.34	35.1187	14	15	29	16.2193	20	314	655.05	195.75	2	2	3	17	0.5	3	0	5.32193	2.022	96	C13H11N3O2	18	0.0344828	67.4919	70.92	5	2	1	5	18	29	0	0	3	0	0	2
ZINC00158191	Cc1ccc(cc1)C[NH+]2CCS(=O)(=O)CC2	240.106	209	2	-0.19168	2	1	46.96	2	1	0	0.803728	2.34	38.7263	6	6	34	27.4737	17	259	985.04	220.99	2	1	0	6	0.5	3	0	5.08746	1.591	82	C12H18NO2S	16	0.176471	64.2335	38.58	3	1	0	4	16	34	0	0	2	1	1	0
ZINC00158735	c1cc(c(cc1Cl)N)Nc2cc[nH+]cc2	220.064	16	1	2.4799	2	2	52.19	2	2	1	0.797411	2.23	32.1747	12	12	26	13.1053	16	219	519.04	186	2	3	0	14	0.444444	4	0	5	2.825	74	C11H11ClN3	15	0	62.1448	52.19	3	4	0	4	15	26	0	0	2	0	0	1
ZINC00159397	c1ccc2c(c1)c(cs2)NC(=O)NC3CC3	232.067	125	1	3.1852	2	2	69.37	2	2	0	0.874021	2.34	35.0235	9	10	28	17.6765	18	253	660.04	193.349	3	2	3	13	0.444444	2	0	5.16993	2.559	86	C12H12N2OS	16	0.107143	67.0014	41.13	3	2	2	4	16	28	0	0	3	1	1	1
ZINC00161223	CC(=O)Nc1ccc(cc1)NC(=O)[C@H]2CC2(C)C	246.137	29	11	2.6296	2	2	58.2	3	1	0	0.773651	2.56	40.4463	6	6	36	22.9137	19	320	1063.04	241.479	4	2	3	12	0.454545	6	0	5.24793	1.85	94	C14H18N2O2	18	0.166667	71.2634	58.2	4	2	2	4	18	36	1	0	2	1	1	0
ZINC00163431	CC(C)[C@](C)(C#N)Nc1ccccc1	188.131	41	1	3.03678	2	1	35.82	3	1	0	0.702502	2.56	33.9887	6	6	30	18.8113	14	155	718.02	201.663	2	1	5	7	0.428571	6	0	4.80735	2.452	66	C12H16N2	14	0.166667	58.9207	35.82	2	1	0	2	14	30	1	0	1	0	0	0
ZINC00164499	Cn1c(cc(=O)[nH]1)Nc2ccccc2	189.09	40	1	1.457	3	2	49.82	2	2	0	0.859692	2.12	29.0367	11	11	25	14.9633	15	186	494.04	174.502	1	2	0	13	0.5	3	0	4.90689	1.329	70	C10H11N3O	14	0.04	55.7584	49.82	4	2	0	4	14	25	0	0	2	0	0	1
ZINC00171101	c1cc2c(cc1NC(=O)N3CCOCC3)non2	248.091	356	3	1.0869	5	1	80.49	1	2	0	0.820823	1.9	34.1675	9	10	30	20.5485	20	315	718.07	197.118	4	1	3	13	0.5	1	0	5.32193	1.308	94	C11H12N4O3	18	0.133333	63.2147	80.49	7	1	2	7	18	30	0	0	3	1	1	1
ZINC00171377	Cc1cc(no1)NC(=O)c2ccc3c(c2)non3	244.06	115	3	1.77152	6	1	94.05	2	3	0	0.645683	1.9	31.5003	14	15	26	14.1957	20	312	478.07	180.945	2	1	3	17	0.5	3	0	5.32193	2.926	96	C11H8N4O3	18	0.0384615	60.9972	94.05	7	1	1	7	18	26	0	0	3	0	0	2
ZINC00171489	c1cc2c(cc1C(=O)N3CCOCC3)nns2	249.057	202	2	1.1637	5	0	83.56	1	2	0	0.882044	2.01	34.4987	9	10	28	20.4793	19	267	628.06	195.84	5	0	2	12	0.444444	1	0	5.24793	0.895	90	C11H11N3O2S	17	0.142857	64.1375	55.32	5	0	1	6	17	28	0	0	3	1	1	1
ZINC00084031	CC(=O)N1CCC(CC1)c2c[nH]c3c2cccc3	242.142	186	1	2.8938	1	1	36.1	1	2	0	0.71887	2.78	41.4043	9	10	36	23.2757	20	303	1138.03	226.728	2	1	3	9	0.5	2	0	5.32193	2.204	96	C15H18N2O	18	0.166667	72.5277	36.1	3	1	1	3	18	36	0	0	3	1	1	1
ZINC00159078	c1cc(ccc1C[NH+]2CCOCC2)CO	208.134	213	13	-0.406	2	2	33.9	3	1	0	0.846912	2.45	35.8263	6	6	33	22.9137	16	240	946.03	202.481	2	2	2	6	0.5	4	0	5	0.403	72	C12H18NO2	15	0.181818	57.5845	33.9	3	2	0	3	15	33	0	0	2	1	1	0
ZINC00032156	COc1ccc(cc1)Nc2c3c([nH]cn3)ncn2	241.096	276	2	2.1051	5	2	75.72	3	3	0	0.751164	2.12	34.7567	15	16	29	19.2213	20	315	655.06	191.658	4	2	2	17	0.5	4	0	5.32193	1.607	94	C12H11N5O	18	0.0344828	67.9604	75.72	6	2	0	6	18	29	0	0	3	0	0	2
ZINC00036068	COC(=O)Nc1ccc(cc1)Cc2ccncc2	242.106	249	2	2.8507	3	1	51.22	3	2	0	0.774693	2.56	37.7791	12	12	32	20.1589	19	341	783.04	225.306	4	1	4	10	0.5	5	0	5.24793	2.161	86	C14H14N2O2	18	0.0625	69.5127	51.22	4	1	1	4	18	32	0	0	2	0	0	1
ZINC00186017	C1CCC2(CC1)OC[C@@H](O2)C[NH+]3CCCC3	226.181	377	2	0.7409	2	1	22.9	2	0	0	0.653776	2.56	41.587	0	0	40	31.389	18	250	1524.03	226.23	2	1	0	0	0.444444	2	0	5.16993	1.816	86	C13H24NO2	16	0.325	61.4387	22.9	3	1	0	3	16	40	1	0	3	3	3	0
ZINC00186834	c1c(c(=O)[nH]c(=O)[nH]1)N2CCCCC2	195.101	360	2	0.0535	3	2	68.96	1	1	0	0.766765	1.9	29.4123	6	6	27	19.4277	15	179	602.05	182.169	1	2	0	9	0.5	1	0	4.90689	1.014	70	C9H13N3O2	14	0.185185	53.7474	68.96	5	2	0	5	14	27	0	0	2	1	1	1
ZINC00187980	C[NH+]1CCC[C@H](C1)OC(=O)c2ccco2	210.113	341	3	0.1135	3	1	43.88	2	1	0	0.734424	2.23	33.5347	5	5	31	23.6013	16	205	814.04	193.976	2	1	3	8	0.5	4	0	5	0.895	74	C11H16NO3	15	0.193548	53.7662	43.88	4	1	0	4	15	31	2	1	2	1	1	1
ZINC00200675	COCC(=O)NCc1[nH]c2ccccc2n1	219.101	50	5	0.8255	3	2	67.01	4	2	0	0.869612	2.12	32.9323	9	10	29	19.7257	17	265	660.05	189.688	4	2	6	9	0.5	5	0	5.08746	0.207	78	C11H13N3O2	16	0.103448	59.8164	67.01	5	2	1	5	16	29	0	0	2	0	0	1
ZINC00201204	CC(=O)Nc1ccc2c(c1)nc([nH]2)C(F)(F)F	243.062	35	2	2.5401	2	2	57.78	1	2	0	0.785988	1.79	28.7073	9	10	25	15.9527	18	245	404.07	181.804	3	2	3	12	0.444444	6	0	5.16993	1.506	90	C10H8F3N3O	17	0.08	55.3994	57.78	4	2	1	7	17	25	0	0	2	0	0	1
ZINC00210034	CC1(C[C@H](CCO1)[NH2+]Cc2ccc(cc2)O)C	236.165	233	4	1.4132	2	2	46.07	3	1	0	0.772449	2.67	42.0134	6	6	39	25.9666	18	284	1328.03	237.073	1	2	2	7	0.5	6	0	5.16993	2.47	86	C14H22NO2	17	0.205128	66.7892	46.07	3	3	0	3	17	39	1	0	2	1	1	0
ZINC00234851	c1cc(oc1)C(=O)N2CCN(CC2)C(=O)N	223.096	333	4	0.1161	3	1	79.78	1	1	0	0.794862	1.9	31.9743	5	5	29	21.3437	17	236	660.06	194.719	5	1	3	8	0.444444	1	0	5.08746	-1.177	80	C10H13N3O3	16	0.137931	55.7679	79.78	6	2	3	6	16	29	0	0	2	1	1	1
ZINC00238636	C1CCC2(CC1)OC[C@@H](O2)C[NH+]3CCCCC3	240.196	377	2	1.131	2	1	22.9	2	0	0	0.734963	2.67	44.6806	0	0	43	33.5754	19	290	1753.03	243.526	2	1	0	0	0.5	2	0	5.24793	2.174	90	C14H26NO2	17	0.325581	66.0557	22.9	3	1	0	3	17	43	1	0	3	3	3	0
ZINC00258308	CC(=O)Nc1ccc2c(c1)nsn2	193.031	356	3	1.6497	4	1	83.12	1	2	0	0.844448	1.79	25.7496	9	10	20	14.1904	14	153	285.05	147.519	4	1	3	12	0.428571	2	0	4.80735	1.463	66	C8H7N3OS	13	0.05	51.7187	54.88	4	1	1	5	13	20	0	0	2	0	0	1
ZINC00284149	Cc1cccc(c1)OCC(=O)Nn2cnnc2	232.096	160	2	0.73562	5	1	69.04	4	2	0	0.735434	2.01	33.3655	11	11	29	18.6325	18	289	628.06	198.048	4	1	4	8	0.5	5	0	5.16993	2.124	82	C11H12N4O2	17	0.0689655	61.0637	69.04	6	1	1	6	17	29	0	0	2	0	0	1
ZINC00346071	CN(C)c1nc(nc(n1)SC)N(C)C#N	224.084	283	1	0.57678	7	0	94.24	3	1	0	0.834853	1.57	31.5815	6	6	27	23.9785	15	165	519.07	194.975	6	0	4	10	0.428571	7	0	4.90689	1.4	70	C8H12N6S	15	0.148148	59.951	68.94	6	0	0	7	15	27	0	0	1	0	0	1
ZINC00375622	C[NH+]1CCC[C@H](C1)OC(=O)c2cccc(c2)F	238.124	228	3	0.6596	2	1	30.74	2	1	0	0.820528	2.45	37.4765	6	6	34	23.9815	18	257	953.04	223.209	2	1	3	9	0.444444	5	0	5.16993	2.356	84	C13H17FNO2	17	0.176471	61.4582	30.74	3	1	0	4	17	34	2	1	2	1	1	0
ZINC00468583	CN(C)c1ccc(cc1)CNn2cnnc2	217.133	161	1	1.0878	5	1	45.98	4	2	0	0.859945	2.12	34.8619	11	11	31	21.0181	17	264	784.05	194.101	4	1	3	7	0.5	6	0	5.08746	2.705	78	C11H15N5	16	0.0967742	63.8557	45.98	5	1	0	5	16	31	0	0	2	0	0	1
ZINC00519780	CC1([C@H]2CC[C@@]1([C@@H](C2)OC(=O)C[NH+](C)C)C)C	240.196	378	1	0.8889	2	1	30.74	3	0	0	0.780608	2.67	44.6806	0	0	43	32.6174	18	231	1664.03	253.246	2	1	5	3	0.5	9	0	5.16993	2.84	94	C14H26NO2	17	0.302326	66.7867	30.74	3	1	0	3	17	43	3	0	2	2	2	0
ZINC00525668	CN(C)c1ccc(cc1)NCc2ccccc2O	242.142	26	5	3.0703	3	2	35.5	4	2	0	0.803301	2.78	41.4043	12	12	36	22.3177	19	324	1063.03	236.448	2	2	3	8	0.454545	7	0	5.24793	3.181	88	C15H18N2O	18	0.0833333	76.2025	35.5	3	2	0	3	18	36	0	0	2	0	0	0
ZINC00531054	Cn1nc(nn1)NC(=O)c2ccc(cc2)F	221.071	203	6	0.6015	5	1	72.7	2	2	0	0.841072	1.68	28.0333	11	11	24	13.5467	17	256	385.07	171.73	5	1	3	14	0.5	4	0	5.08746	1.629	80	C9H8FN5O	16	0.0416667	53.1512	72.7	6	1	1	7	16	24	0	0	2	0	0	1
ZINC01248426	Cc1ccc(cc1)Nc2c3cn[nH]c3ncn2	225.101	275	2	2.40492	4	2	66.49	2	3	0	0.76957	2.23	33.9547	15	16	28	15.9853	19	273	628.05	182.867	4	2	0	16	0.444444	3	0	5.24793	2.96	90	C12H11N5	17	0.0357143	66.1454	66.49	5	2	0	5	17	28	0	0	3	0	0	2
ZINC01261715	CCC(=O)OCc1cc2cc(ccc2[nH]c1=O)C	245.105	36	1	2.28972	3	1	59.16	3	2	0	0.783585	2.56	38.1479	10	11	33	20.8901	19	289	850.04	236.636	2	1	5	11	0.5	6	0	5.24793	2.79	90	C14H15NO3	18	0.121212	69.3927	59.16	4	1	0	4	18	33	0	0	2	0	0	1
ZINC01270757	c1ccc(cc1)C[NH2+][C@H]2CS(=O)(=O)C=C2	224.075	235	1	0.0607	2	1	59.13	3	1	0	0.858255	2.23	34.2991	6	6	29	21.7809	16	228	690.04	201.058	2	1	2	6	0.444444	3	0	5	1.697	76	C11H14NO2S	15	0.103448	58.7862	50.75	3	2	0	4	15	29	1	0	2	0	1	0
ZINC01298979	Cc1cccc(c1)Nc2c3cnn(c3ncn2)C	239.117	275	2	2.41532	5	1	55.63	2	3	0	0.729185	2.34	37.0483	15	16	31	19.4917	20	282	783.05	200.163	4	1	0	16	0.444444	4	0	5.32193	2.765	96	C13H13N5	18	0.0645161	70.7657	55.63	5	1	0	5	18	31	0	0	3	0	0	2
ZINC01462232	c1ccc(cc1)C(=O)N[C@H]2CS(=O)(=O)C=C2	237.046	78	2	0.7271	3	1	71.62	2	1	0	0.633156	2.12	33.1007	6	6	27	20.1193	17	239	544.05	205.894	4	1	3	9	0.444444	2	0	5.08746	1.478	82	C11H11NO3S	16	0.0740741	60.623	63.24	4	1	1	5	16	27	1	0	2	0	1	0
ZINC00167442	CCOC(=O)C[NH+]1CCS(=O)(=O)CC1	222.08	374	2	-2.1372	4	1	73.26	3	0	0	0.812053	1.68	31.9567	0	0	30	28.1613	14	191	718.06	197.916	4	1	5	3	0.444444	5	0	4.80735	-0.43	66	C8H16NO4S	14	0.233333	50.8505	64.88	5	1	0	6	14	30	0	0	1	1	1	0
ZINC00169809	CCOC(=O)C1CCN(CC1)c2ccc(cc2)N	248.152	175	2	2.0483	4	1	55.56	3	1	1	0.749344	2.56	41.7799	6	6	38	26.0581	19	333	1215.04	244.115	4	1	5	8	0.5	6	0	5.24793	2.194	88	C14H20N2O2	18	0.184211	72.4244	55.56	4	2	0	4	18	38	0	0	2	1	1	0
ZINC00169822	CCOC(=O)c1cc2c([nH]1)ccs2	195.035	292	1	2.4061	3	1	70.33	2	2	0	0.823168	2.01	27.4451	8	9	22	15.6529	14	167	373.04	154.248	2	1	5	11	0.5	4	0	4.80735	1.934	66	C9H9NO2S	13	0.0909091	52.1322	42.09	3	1	0	4	13	22	0	0	2	0	0	2
ZINC00040682	c1cc(sc1)C[NH2+]Cc2ccc(cc2)O	220.08	238	3	1.7173	2	2	65.08	4	2	0	0.810402	2.45	35.2571	11	11	29	17.5849	16	251	690.03	196.027	0	2	3	7	0.5	5	0	5	2.012	72	C12H14NOS	15	0.0689655	61.7592	36.84	2	3	0	3	15	29	0	0	2	0	0	1
ZINC00564327	Cc1ccc(cc1)c2nc(on2)C[NH2+]C(C)C	232.145	6	3	1.51682	3	1	55.53	4	2	0	0.8103	2.45	38.9843	11	11	35	22.9137	18	293	1024.04	216.808	1	1	4	11	0.454545	7	0	5.16993	3.105	84	C13H18N3O	17	0.142857	65.2364	55.53	4	2	0	4	17	35	0	0	2	0	0	1
ZINC00140258	c1cc(ccc1C(=O)N2CCSCC2)Cl	241.033	226	3	2.529	2	0	45.61	1	1	0	0.736027	2.23	34.3435	6	6	27	18.7565	16	217	574.04	206.161	2	0	2	9	0.444444	2	0	5	2.952	74	C11H12ClNOS	15	0.148148	64.6805	20.31	2	0	1	4	15	27	0	0	2	1	1	0
ZINC00033917	c1ccc(c(c1)N)Nc2[nH]c3ccccc3n2	224.106	49	5	2.8887	3	3	66.73	2	3	1	0.691589	2.45	35.2815	15	16	29	15.0985	19	270	689.04	189.167	3	3	0	17	0.444444	3	0	5.24793	2.204	90	C13H12N4	17	0	70.2308	66.73	4	4	0	4	17	29	0	0	3	0	0	1
ZINC00050930	CC(C)COc1ccc(cc1)[C@@H]2C(=O)NC(=O)N2	248.116	119	2	1.6019	3	2	67.43	4	1	1	0.74846	2.34	38.1547	6	6	34	22.6433	19	316	919.05	232.973	4	2	4	7	0.454545	6	0	5.24793	1.679	90	C13H16N2O3	18	0.147059	66.1904	67.43	5	2	3	5	18	34	1	0	2	1	1	0
ZINC00077351	CC(=O)NCCc1c[nH]c2c1cc(cc2)F	220.101	13	2	1.9856	1	2	44.89	3	2	0	0.854693	2.34	33.3473	9	10	29	17.6927	17	239	660.04	193.264	2	2	5	9	0.444444	5	0	5.08746	1.847	80	C12H13FN2O	16	0.103448	60.6444	44.89	3	2	1	4	16	29	0	0	2	0	0	1
ZINC00104417	c1cnccc1CCNC(=O)NC2CCCCC2	247.168	96	2	2.256	2	2	54.02	4	1	0	0.797952	2.56	42.7447	6	6	39	26.5553	19	357	1294.04	246.322	4	2	5	6	0.5	4	0	5.24793	1.794	84	C14H21N3O	18	0.205128	71.3484	54.02	4	2	2	4	18	39	0	0	2	1	1	1
ZINC00140907	Cc1cc(=O)oc2c1ccc(c2C[NH+](C)C)O	234.113	137	1	0.45152	3	2	54.88	2	2	1	0.78018	2.45	37.0547	10	11	33	21.6853	18	200	884.04	223.295	0	2	3	12	0.428571	6	0	5.16993	2.273	88	C13H16NO3	17	0.121212	65.4005	54.88	4	2	0	4	17	33	0	0	2	0	0	1
ZINC00146727	c1cc(oc1)CNC(=O)NC2CCCCC2	222.137	345	2	2.4115	2	2	54.27	3	1	0	0.801361	2.34	36.9263	5	5	34	23.8717	17	268	985.04	212.16	3	2	4	5	0.5	3	0	5.08746	1.585	76	C12H18N2O2	16	0.205882	60.9524	54.27	4	2	2	4	16	34	0	0	2	1	1	1
ZINC00150320	CC(C)C(=O)Nc1nnc(s1)COC	215.073	297	5	1.279	5	1	92.35	4	1	0	0.774436	1.68	30.5523	5	5	27	21.3457	14	187	547.06	184.838	5	1	4	8	0.444444	7	0	4.80735	0.814	64	C8H13N3O2S	14	0.185185	54.0897	64.11	5	1	1	6	14	27	0	0	1	0	0	1
ZINC00237940	c1ccc2c(c1)c(c[nH]2)C[NH+]3CCCCCC3	229.17	218	3	2.1268	0	2	20.23	2	2	0	0.887459	2.89	42.6027	9	10	38	24.9373	19	268	1328.02	221.893	0	2	0	9	0.444444	2	0	5.24793	2.944	88	C15H21N2	17	0.184211	71.1674	20.23	2	2	0	2	17	38	0	0	3	1	1	1
ZINC00255976	Cc1cccc(c1)C(=O)N2CCC(CC2)C(=O)N	246.137	188	4	1.33252	2	1	63.4	2	1	0	0.859972	2.56	40.4463	6	6	36	22.9137	19	291	1063.04	241.479	4	1	3	9	0.5	3	0	5.24793	1.194	90	C14H18N2O2	18	0.166667	69.0009	63.4	4	2	2	4	18	36	0	0	2	1	1	0
ZINC00300290	CNC(=O)[C@@H]1CC(=O)N(C1)c2ccc(cc2)OC	248.116	152	2	0.7941	3	1	58.64	3	1	0	0.878197	2.34	38.1547	6	6	34	23.9633	19	305	919.05	232.973	4	1	4	10	0.454545	5	0	5.24793	0.153	90	C13H16N2O3	18	0.147059	67.5207	58.64	5	1	2	5	18	34	1	0	2	1	1	0
ZINC00301608	Cn1c2ccccc2nc1C[NH2+]C3CCCCC3	244.181	171	1	1.9694	2	1	34.43	3	2	0	0.765112	2.78	44.3694	9	10	40	27.3506	20	316	1458.03	232.89	1	1	2	9	0.5	4	0	5.32193	3.083	94	C15H22N3	18	0.2	73.2164	34.43	3	2	0	3	18	40	0	0	3	1	1	1
ZINC00319716	c1cc(cnc1)CNc2ccc(cc2C(=O)[O-])N	242.093	59	2	0.6394	5	2	91.07	4	2	1	0.680861	2.34	35.7855	12	12	30	16.3545	19	295	655.05	217.689	5	2	3	11	0.5	6	0	5.24793	0.443	88	C13H12N3O2	18	0.0333333	66.7486	91.07	5	3	0	5	18	30	0	0	2	0	0	1
ZINC00322796	C1CCN(CC1)c2c(non2)N	168.101	323	1	0.6421	5	1	68.18	1	1	0	0.799998	1.68	25.5235	5	5	24	16.3545	13	124	493.05	141.52	2	1	0	7	0.5	2	0	4.70044	2.03	60	C7H12N4O	12	0.208333	44.7744	68.18	5	2	0	5	12	24	0	0	2	1	1	1
ZINC00373625	CC[C@H](C)c1ccc(c(c1)O)NC(=O)C	207.126	33	4	2.8641	2	2	49.33	3	1	1	0.762556	2.45	35.1595	6	6	32	20.2025	15	197	814.03	210.883	2	2	4	10	0.444444	7	0	4.90689	3.273	70	C12H17NO2	15	0.15625	61.1165	49.33	3	2	1	3	15	32	1	0	1	0	0	0
ZINC00444937	Cc1ccc(c(c1)C)OCC(=O)N2CCOCC2	249.136	190	2	1.54104	3	0	38.77	3	1	0	0.785431	2.56	40.8151	6	6	37	27.5409	19	322	1138.04	241.909	3	0	4	7	0.454545	5	0	5.24793	1.514	88	C14H19NO3	18	0.189189	68.81	38.77	4	0	1	4	18	37	0	0	2	1	1	0
ZINC00458805	CCOC(=O)c1c(nc(s1)N(C)C(=O)C)C	242.073	288	1	1.61092	5	0	87.74	3	1	0	0.83358	1.9	34.4411	5	5	30	24.7169	16	211	660.06	214.587	5	0	5	11	0.444444	8	0	5	0.524	76	C10H14N2O3S	16	0.166667	61.8915	59.5	5	0	1	6	16	30	0	0	1	0	0	1
ZINC00526336	Cn1nc(nn1)NC(=O)c2ccc(cc2)Cl	237.042	203	6	1.1158	5	1	72.7	2	2	0	0.867887	1.68	29.6563	11	11	24	12.7637	17	256	385.07	180.874	5	1	3	14	0.5	4	0	5.08746	2.09	80	C9H8ClN5O	16	0.0416667	58.2032	72.7	6	1	1	7	16	24	0	0	2	0	0	1
ZINC00530318	Cn1nc(nn1)NC(=O)c2cc3ccccc3o2	243.076	203	6	1.2086	6	1	85.84	2	3	0	0.753665	1.9	32.4651	14	15	27	15.3529	20	311	535.07	183.152	5	1	3	17	0.5	3	0	5.32193	1.524	96	C11H9N5O2	18	0.037037	62.9652	85.84	7	1	1	7	18	27	0	0	3	0	0	2
ZINC00557675	CCc1ccc(cc1)C(=O)Nc2nnn(n2)CC	245.128	203	6	1.5077	5	1	72.7	4	2	0	0.84701	2.12	37.4239	11	11	33	19.9961	19	336	850.06	217.551	5	1	3	14	0.5	6	0	5.24793	2.792	88	C12H15N5O	18	0.121212	67.2642	72.7	6	1	1	6	18	33	0	0	2	0	0	1
ZINC00558135	CCOc1ccc(cc1)C(=O)Nc2nnn(n2)C	247.107	203	6	0.8611	6	1	81.93	4	2	0	0.762604	1.9	35.1323	11	11	31	19.7257	19	338	718.07	209.045	5	1	3	15	0.5	6	0	5.24793	1.806	88	C11H13N5O2	18	0.0967742	64.3622	81.93	7	1	1	7	18	31	0	0	2	0	0	1
ZINC00621487	c1cc(oc1)C(=O)Nc2ccc3c(c2)[nH]c(=O)[nH]3	243.064	45	5	1.7015	3	3	90.89	2	3	0	0.701138	2.12	32.8271	14	15	27	15.6509	20	310	535.06	198.145	2	3	3	18	0.5	2	0	5.32193	0.131	96	C12H9N3O3	18	0	65.5806	90.89	6	3	1	6	18	27	0	0	3	0	0	2
ZINC00795089	Cc1ccc(cc1)C[NH2+]Cc2ccncc2	213.139	237	3	1.65362	1	1	29.5	4	2	0	0.892773	2.78	38.1755	12	12	33	19.9045	17	290	916.02	211.68	1	1	3	6	0.454545	5	0	5.08746	2.541	76	C14H17N2	16	0.0909091	64.7494	29.5	2	2	0	2	16	33	0	0	2	0	0	1
ZINC00795102	c1cc2c(cc1C[NH2+]C[C@@H]3CCC=CC3)OCO2	246.149	231	6	1.835	2	1	35.07	4	1	0	0.802206	2.78	42.4399	6	6	38	25.6961	20	352	1294.03	239.376	0	1	3	8	0.454545	4	0	5.32193	3.064	92	C15H20NO2	18	0.184211	69.5424	35.07	3	2	0	3	18	38	1	0	3	0	2	0
ZINC00795103	c1ccnc(c1)C[NH2+]Cc2ccc3c(c2)OCO3	243.113	231	6	1.0739	3	1	47.96	4	2	0	0.880589	2.56	38.4459	12	12	33	21.5501	20	352	919.04	216.904	1	1	3	8	0.454545	4	0	5.32193	1.682	92	C14H15N2O2	18	0.0909091	66.1354	47.96	4	2	0	4	18	33	0	0	3	0	1	1
ZINC00800871	CC(C)(C)NC(=O)N1CCC(CC1)C(=O)OC	242.163	321	2	1.3795	3	1	58.64	1	0	0	0.641092	2.23	40.3954	0	0	39	30.5226	17	255	1249.05	246.843	5	1	5	4	0.5	7	0	5.08746	1.029	82	C12H22N2O3	17	0.25641	64.5977	58.64	5	1	2	5	17	39	0	0	1	1	1	0
ZINC00811938	CCc1nnc(s1)NC(=O)C[NH+](C)C	215.097	299	4	-0.8165	4	2	87.56	4	1	0	0.859478	1.68	32.1839	5	5	29	22.9361	14	190	659.06	188.363	4	2	5	8	0.444444	7	0	4.80735	0.405	64	C8H15N4OS	14	0.172414	55.5944	59.32	5	2	1	6	14	29	0	0	1	0	0	1
ZINC00812223	c1cc(ccc1C[NH2+]Cc2ccc(cc2)F)C#N	241.114	240	4	1.96098	1	1	40.4	4	2	0	0.745635	2.78	38.4921	12	12	32	17.1679	19	374	783.03	229.771	1	1	3	8	0.461538	5	0	5.24793	3.24	86	C15H14FN2	18	0.0625	66.8904	40.4	2	2	0	3	18	32	0	0	2	0	0	0
ZINC00819567	COc1cccc(c1)C[NH+]2CCC(CC2)C(=O)N	249.16	211	6	-0.0246	2	2	56.76	4	1	0	0.635505	2.56	42.4467	6	6	39	26.4913	19	318	1294.04	245.434	2	2	3	7	0.454545	5	0	5.24793	0.717	88	C14H21N2O2	18	0.179487	69.3131	56.76	4	3	1	4	18	39	0	0	2	1	1	0
ZINC01403376	c1c(nns1)C(=O)N2CCOCC2	199.042	328	1	0.0105	5	0	83.56	1	1	0	0.820846	1.57	26.1251	5	5	22	18.2929	14	154	373.06	155.186	5	0	2	8	0.428571	1	0	4.80735	-0.118	64	C7H9N3O2S	13	0.181818	46.6315	55.32	5	0	1	6	13	22	0	0	2	1	1	1
ZINC00068231	c1cc(c(cc1C(F)(F)F)N)N2CCCCC2	244.119	61	2	3.2779	2	1	29.26	1	1	1	0.743607	2.23	34.9929	6	6	32	21.3271	18	246	817.05	212.782	2	1	3	8	0.444444	6	0	5.16993	3.323	88	C12H15F3N2	17	0.1875	61.9204	29.26	2	2	0	5	17	32	0	0	2	1	1	0
ZINC00133561	COC(=O)c1cccc2c1-c3ccccc3C2=O	238.063	66	1	2.6846	3	0	43.37	1	2	0	0.806752	2.78	35.4739	12	12	28	14.7641	20	239	594.03	214.406	3	0	4	17	0.5	3	0	5.32193	3.43	98	C15H10O3	18	0.0357143	66.65	43.37	3	0	0	3	18	28	0	0	3	0	1	0
ZINC00156223	CCOC(=O)Nc1cccc(c1)Cl	199.04	11	6	2.9084	2	1	38.33	2	1	0	0.635882	2.01	27.3919	6	6	23	14.8861	13	161	373.04	174.206	3	1	5	10	0.5	5	0	4.70044	2.492	58	C9H10ClNO2	13	0.0869565	52.0967	38.33	3	1	1	4	13	23	0	0	1	0	0	0
ZINC00403435	Cc1ccc(o1)C[NH+](C)C	140.108	339	3	0.23252	1	1	17.58	2	1	0	0.429604	2.12	25.3171	5	5	24	18.5409	10	91	486.02	139.5	0	1	3	5	0.5	5	0	4.32193	0.547	46	C8H14NO	10	0.166667	39.9597	17.58	2	1	0	2	10	24	0	0	1	0	0	1
ZINC00405112	C1CC[NH+](C1)C[C@H](CO)O	146.118	388	1	-1.9817	2	3	44.9	3	0	0	0.698386	1.9	25.6927	0	0	26	18.8113	10	95	586.03	147.167	2	3	4	0	0.5	5	0	4.32193	-0.971	44	C7H16NO2	10	0.269231	37.8903	44.9	3	3	0	3	10	26	1	0	1	1	1	0
ZINC00731160	c1cc(cc(c1)c2ccc(cc2)O)C#N	195.068	63	3	2.93088	2	1	44.02	1	2	0	0.817502	2.67	30.7831	12	12	24	10.4989	16	215	415.02	185.587	1	1	2	15	0.444444	2	0	5	3.279	74	C13H9NO	15	0	58.2578	44.02	2	1	0	2	15	24	0	0	2	0	0	0
ZINC00731161	c1cc(cc(c1)c2cccc(c2)O)C#N	195.068	63	3	2.93088	2	1	44.02	1	2	0	0.759871	2.67	30.7831	12	12	24	10.4989	16	196	415.02	185.587	1	1	2	15	0.5	2	0	5	3.279	74	C13H9NO	15	0	58.2578	44.02	2	1	0	2	15	24	0	0	2	0	0	0
ZINC00057161	C[NH+](C)Cc1c[nH]c2c1cc(cc2)OC	205.134	218	3	0.821	1	2	29.46	3	2	0	0.639641	2.45	35.4575	9	10	32	22.4805	16	191	879.03	191.151	0	2	3	10	0.5	6	0	5	1.637	76	C12H17N2O	15	0.125	61.3654	29.46	3	2	0	3	15	32	0	0	2	0	0	1
ZINC00115002	CC(=O)c1ccc(cc1)OCC(=O)[O-]	193.05	132	3	0.0179	4	0	66.43	4	1	0	0.635577	2.12	26.8091	6	6	23	14.6289	14	190	347.04	178.92	3	0	4	9	0.444444	6	0	4.80735	0.715	64	C10H9O4	14	0.0869565	46.9485	66.43	4	0	0	4	14	23	0	0	1	0	0	0
ZINC00161239	COc1ccc2c(c1)non2	150.043	357	2	1.2314	4	0	48.15	1	2	0	0.720927	1.79	20.1248	9	10	17	10.3912	12	111	214.04	112.144	0	0	2	10	0.5	2	0	4.58496	2.587	56	C7H6N2O2	11	0.0588235	38.356	48.15	4	0	0	4	11	17	0	0	2	0	0	1
ZINC00389485	c1ccc(cc1)COC(=O)NO	167.058	197	1	1.302	3	2	58.56	2	1	2	0.564361	1.9	23.5871	6	6	21	12.0529	12	148	309.04	150.489	2	2	5	6	0.5	4	0	4.58496	1.153	52	C8H9NO3	12	0.047619	41.5492	58.56	4	2	1	4	12	21	0	0	1	0	0	0
ZINC00394925	CCN(CCO)c1ccc(c(c1)C)N	194.142	176	4	1.39582	3	2	49.49	4	1	1	0.754554	2.34	34.3643	6	6	32	20.9977	14	166	842.03	198.43	3	2	6	8	0.5	8	0	4.80735	1.354	64	C11H18N2O	14	0.15625	60.5642	49.49	3	3	0	3	14	32	0	0	1	0	0	0
ZINC00403332	c1ccc(cc1)COC(=O)N2CCC[C@H]2CO	235.121	200	2	1.7799	3	1	49.77	3	1	0	0.70585	2.45	37.7215	6	6	34	23.4385	18	281	953.04	224.613	4	1	4	6	0.5	5	0	5.16993	1.567	82	C13H17NO3	17	0.176471	63.4408	49.77	4	1	1	4	17	34	1	0	2	1	1	0
ZINC00403451	COc1cc2cccnc2c(c1)N	174.079	267	1	1.8256	3	1	48.14	1	2	1	0.574208	2.23	27.2699	10	11	23	13.5081	14	144	420.03	152.605	2	1	2	12	0.428571	3	0	4.80735	1.223	66	C10H10N2O	13	0.0434783	52.7074	48.14	3	2	0	3	13	23	0	0	2	0	0	1
ZINC00406912	COc1ccc(cc1N)N	138.079	140	2	0.8596	3	2	61.27	1	1	1	0.573781	1.9	21.9899	6	6	20	11.5281	10	84	310.03	129.246	2	2	2	9	0.5	4	0	4.32193	0.303	46	C7H10N2O	10	0.05	41.8188	61.27	3	4	0	3	10	20	0	0	1	0	0	0
ZINC00901466	c1ccc(cc1)NO	109.053	74	1	1.4877	2	2	32.26	1	1	0	0.885934	1.9	17.1296	6	6	15	6.99245	8	60	169.02	100.954	0	2	2	8	0.4	2	0	4	1.336	34	C6H7NO	8	0	31.8512	32.26	2	2	0	2	8	15	0	0	1	0	0	0
ZINC00030723	Cc1ccc(cc1)CNC(=O)Cc2cccs2	245.087	87	2	2.91542	2	1	57.34	4	2	0	0.834394	2.67	39.4439	11	11	32	20.2961	18	310	817.03	226.665	2	1	4	6	0.454545	5	0	5.16993	2.448	82	C14H15NOS	17	0.09375	71.0487	29.1	2	1	1	3	17	32	0	0	2	0	0	1
ZINC00030738	CCC[C@H](C)C(=O)Nc1c(cccc1C)C	219.162	32	1	3.67814	1	1	29.1	4	1	0	0.840715	2.78	40.5447	6	6	37	24.5753	16	221	1129.02	236.685	2	1	6	9	0.444444	8	0	5	3.412	74	C14H21NO	16	0.189189	68.6177	29.1	2	1	1	2	16	37	1	0	1	0	0	0
ZINC00030858	CC(C)CC(=O)Nc1ccc(cc1)NC(=O)C	234.137	29	11	2.6296	2	2	58.2	4	1	0	0.826656	2.45	38.6863	6	6	35	22.9137	17	281	953.04	236.539	4	2	5	12	0.454545	7	0	5.08746	1.86	78	C13H18N2O2	17	0.142857	68.8304	58.2	4	2	2	4	17	35	0	0	1	0	0	0
ZINC00031636	CCOc1ccc(cc1)C(=O)Nc2cc(on2)C	246.1	113	4	2.63402	4	1	64.36	4	2	0	0.805736	2.34	36.8211	11	11	32	20.7549	19	338	783.05	219.437	2	1	3	15	0.5	6	0	5.24793	2.614	88	C13H14N2O3	18	0.09375	66.8042	64.36	5	1	1	5	18	32	0	0	2	0	0	1
ZINC00035195	c1cc(c(c(c1)F)C(=O)N2CCCCCC2)F	239.112	226	3	2.981	1	0	20.31	1	1	0	0.842818	2.45	35.8979	6	6	32	21.7421	18	225	817.04	219.168	2	0	2	9	0.5	3	0	5.16993	3.113	84	C13H15F2NO	17	0.1875	60.7295	20.31	2	0	1	4	17	32	0	0	2	1	1	0
ZINC00101545	Cc1ccc(cc1)CNC(=O)c2ccc(cc2)C	239.131	79	3	3.23344	1	1	29.1	3	2	0	0.790715	3	41.3975	12	12	35	20.2025	19	345	990.02	240.111	2	1	4	9	0.5	5	0	5.24793	4.011	88	C16H17NO	18	0.0857143	73.5282	29.1	2	1	1	2	18	35	0	0	2	0	0	0
ZINC00110644	C[NH+]1CCC(CC1)OC(=O)c2cccc(c2)F	238.124	228	3	0.6596	2	1	30.74	2	1	0	0.765455	2.45	37.4765	6	6	34	23.9815	18	278	953.04	223.209	2	1	3	9	0.5	5	0	5.16993	2.356	84	C13H17FNO2	17	0.176471	61.4582	30.74	3	1	0	4	17	34	0	0	2	1	1	0
ZINC00127975	c1ccc2c(c1)nc(s2)N3CCOCC3	220.067	170	2	2.1329	4	0	53.6	1	2	0	0.852375	2.23	33.2635	9	10	27	20.6145	17	211	631.04	178.69	3	0	0	10	0.5	1	0	5.08746	1.86	80	C11H12N2OS	15	0.148148	62.652	25.36	3	0	0	4	15	27	0	0	3	1	1	1
ZINC00137617	Cc1cccc(c1)NC(=O)Nc2nc(cs2)C	247.078	105	1	3.40394	3	2	82.26	2	2	0	0.876017	2.23	36.7903	11	11	30	20.0897	18	281	689.05	214.066	4	2	3	15	0.5	4	0	5.16993	2.041	84	C12H13N3OS	17	0.0666667	70.6714	54.02	4	2	2	5	17	30	0	0	2	0	0	1
ZINC00138189	c1cc(sc1)C(=O)Nc2ccc(cc2)C#N	228.036	45	5	2.87208	3	1	81.13	2	2	0	0.897287	2.34	32.3563	11	11	24	13.3037	17	260	385.04	197.796	3	1	3	16	0.5	2	0	5.08746	1.778	78	C12H8N2OS	16	0	63.4292	52.89	3	1	1	4	16	24	0	0	2	0	0	1
ZINC00189373	Cc1cc(no1)NC(=O)c2ccc(cc2)N(C)C	245.116	113	4	2.30132	4	1	58.37	3	2	0	0.853025	2.34	37.7859	11	11	33	21.9121	19	317	850.05	221.643	3	1	3	15	0.454545	6	0	5.24793	2.485	90	C13H15N3O2	18	0.0909091	69.9622	58.37	5	1	1	5	18	33	0	0	2	0	0	1
ZINC00206171	COc1cc(ccc1O)C[NH2+]C2CCCCC2	236.165	233	4	1.7969	2	2	46.07	4	1	0	0.864956	2.67	42.0134	6	6	39	25.9666	18	282	1328.03	237.073	0	2	2	8	0.5	6	0	5.16993	2.715	82	C14H22NO2	17	0.205128	67.1612	46.07	3	3	0	3	17	39	0	0	2	1	1	0
ZINC00209570	CC(=O)NCC1(CCOCC1)c2ccccc2	233.142	83	1	1.8709	2	1	38.33	3	1	0	0.817208	2.67	40.0131	6	6	36	24.3049	18	216	1097.03	233.119	3	1	4	6	0.5	4	0	5.16993	1.542	84	C14H19NO2	17	0.194444	66.8567	38.33	3	1	1	3	17	36	0	0	2	1	1	0
ZINC00242114	CC(=O)c1ccc(cc1)OC(=O)c2cccs2	246.035	134	2	3.1699	4	0	71.61	3	2	0	0.80898	2.45	34.8539	11	11	27	17.0441	18	279	512.04	213.316	2	0	3	16	0.5	5	0	5.16993	2.463	84	C13H10O3S	17	0.037037	65.724	43.37	3	0	0	4	17	27	0	0	2	0	0	1
ZINC00263262	COc1ccc(cc1)C[NH2+]C2CCCC2	206.154	233	4	1.7012	1	1	25.84	4	1	0	0.800542	2.67	38.1179	6	6	35	23.7801	16	245	1086.02	210.987	0	1	2	7	0.5	5	0	5	2.82	72	C13H20NO	15	0.2	60.8794	25.84	2	2	0	2	15	35	0	0	2	1	1	0
ZINC00268556	c1cc(cc(c1)F)C[NH2+]Cc2ccco2	206.098	238	3	1.6823	1	1	29.75	4	2	0	0.90171	2.45	32.2473	11	11	28	17.3307	16	234	631.03	183.586	0	1	3	6	0.444444	5	0	5	2.214	72	C12H13FNO	15	0.0714286	54.4414	29.75	2	2	0	3	15	28	0	0	2	0	0	1
ZINC00288534	COc1cccc(c1)C(=O)Nc2ccccc2F	245.085	25	5	3.0866	2	1	38.33	3	2	0	0.888319	2.56	35.9025	12	12	30	17.8555	19	291	655.04	220.377	2	1	3	16	0.5	5	0	5.24793	3.069	88	C14H12FNO2	18	0.0333333	67.3472	38.33	3	1	1	4	18	30	0	0	2	0	0	0
ZINC00311350	CCC(=O)Nc1nnc(s1)C2CCCCC2	239.109	299	4	2.9343	4	1	83.12	3	1	0	0.865382	2.12	37.6975	5	5	33	23.8025	17	254	916.05	215.58	4	1	4	8	0.5	4	0	5.08746	2.952	78	C11H17N3OS	16	0.242424	64.6557	54.88	4	1	1	5	16	33	0	0	2	1	1	1
ZINC00322331	CC(=O)Nc1nnc(s1)COc2ccccc2	249.057	297	5	2.0755	5	1	92.35	4	2	0	0.791169	2.01	34.4987	11	11	28	19.1593	18	304	569.06	205.56	4	1	3	8	0.454545	5	0	5.16993	2.185	82	C11H11N3O2S	17	0.0714286	64.9867	64.11	5	1	1	6	17	28	0	0	2	0	0	1
ZINC00338718	Cc1ccc(c(c1)OC(=O)c2ccncc2)C	227.095	68	1	2.91764	3	0	39.19	2	2	0	0.705856	2.67	36.0123	12	12	30	18.4057	18	255	689.03	214.309	2	0	3	15	0.444444	5	0	5.16993	2.935	84	C14H13NO2	17	0.0666667	65.1115	39.19	3	0	0	3	17	30	0	0	2	0	0	1
ZINC00344445	c1ccc2c(c1)[nH]c(n2)C[NH+]3CCOCC3	218.129	216	6	-0.022	2	2	42.35	2	2	0	0.791322	2.34	35.8907	9	10	32	22.7073	18	255	916.04	189.792	2	2	0	9	0.444444	2	0	5.16993	0.519	84	C12H16N3O	16	0.15625	61.3134	42.35	4	2	0	4	16	32	0	0	3	1	1	1
ZINC00346025	CC(C)(C)C1CCN(CC1)C(=O)c2ccccc2	245.178	188	4	3.5849	1	0	20.31	1	1	0	0.624124	3	45.3982	6	6	41	28.0818	19	291	1458.02	258.92	2	0	3	9	0.5	5	0	5.24793	4.624	92	C16H23NO	18	0.219512	74.5245	20.31	2	0	1	2	18	41	0	0	2	1	1	0
ZINC00349236	CC(=O)Nc1cccc(c1)NC(=O)N	193.085	29	11	1.1356	2	3	84.22	2	1	0	0.785123	1.9	28.0787	6	6	25	14.6013	14	170	443.05	178.352	5	3	3	13	0.5	3	0	4.80735	-0.348	64	C9H11N3O2	14	0.04	53.9518	84.22	5	4	3	5	14	25	0	0	1	0	0	0
ZINC00355961	Cn1c(c(cn1)Cl)C(=O)N2CCCCC2	227.083	355	1	1.6996	3	0	38.13	1	1	0	0.870537	2.01	33.2171	5	5	29	20.6429	16	180	690.05	194.986	3	0	2	8	0.428571	3	0	5	1.598	76	C10H14ClN3O	15	0.206897	57.9725	38.13	4	0	1	5	15	29	0	0	2	1	1	1
ZINC00357470	c1ccc(cc1)OCC(=O)NC2CCCCC2	233.142	147	2	2.5143	2	1	38.33	4	1	0	0.744942	2.67	40.0131	6	6	36	24.3049	18	309	1097.03	233.119	2	1	4	7	0.454545	4	0	5.16993	2.937	80	C14H19NO2	17	0.194444	66.9527	38.33	3	1	1	3	17	36	0	0	2	1	1	0
ZINC00359136	c1ccc(cc1)OCC(=O)N2CCNC(=O)C2	234.1	189	4	0.0238	3	1	58.64	3	1	0	0.743861	2.23	35.0611	6	6	31	21.7769	18	284	752.05	215.677	4	1	4	7	0.5	3	0	5.16993	0.213	82	C12H14N2O3	17	0.129032	61.5267	58.64	5	1	2	5	17	31	0	0	2	1	1	0
ZINC00359210	C1CCC(C1)C(=O)N2CCNC(=O)C2	196.121	316	1	0.135	2	1	49.41	1	0	0	0.673513	2.12	32.0727	0	0	30	22.0473	15	167	779.04	191.104	4	1	2	3	0.428571	1	0	4.90689	0.158	70	C10H16N2O2	14	0.266667	51.5477	49.41	4	1	2	4	14	30	0	0	2	2	2	0
ZINC00360078	Cc1ccc(s1)C[NH2+]C[C@@H](C)O	186.095	340	1	0.50072	2	2	65.08	4	1	0	0.8444	2.12	31.3107	5	5	28	19.7713	12	149	652.03	175.305	1	2	5	5	0.5	7	0	4.58496	0.31	54	C9H16NOS	12	0.178571	51.2332	36.84	2	3	0	3	12	28	1	0	1	0	0	1
ZINC00361437	c1ccc(cc1)CNC(=O)c2cccc(c2)F	229.09	79	3	2.7557	1	1	29.1	3	2	0	0.822925	2.67	35.1005	12	12	29	15.9395	18	284	628.03	211.587	2	1	4	9	0.5	4	0	5.16993	3.298	82	C14H12FNO	17	0.0344828	64.0122	29.1	2	1	1	3	17	29	0	0	2	0	0	0
ZINC00362144	CCC(CC)C(=O)Nc1nccs1	198.083	106	3	2.5178	3	1	70.23	4	1	0	0.824475	2.01	31.0771	5	5	27	20.5229	13	145	573.04	182.347	3	1	5	8	0.428571	6	0	4.70044	1.532	58	C9H14N2OS	13	0.185185	54.8157	41.99	3	1	1	4	13	27	0	0	1	0	0	1
ZINC00363473	Cc1cc(c(c(c1)C)NC(=O)COC)C	207.126	27	5	2.19676	2	1	38.33	3	1	0	0.806722	2.45	35.1595	6	6	32	22.1185	15	200	814.03	210.883	3	1	5	9	0.444444	7	0	4.90689	1.647	70	C12H17NO2	15	0.15625	61.1587	38.33	3	1	1	3	15	32	0	0	1	0	0	0
ZINC00363816	CCCC(=O)Nc1cccnc1Cl	198.056	254	3	2.4736	2	1	41.99	3	1	1	0.748369	2.01	28.3567	6	6	24	15.3833	13	159	420.04	176.413	3	1	5	9	0.5	5	0	4.70044	1.557	58	C9H11ClN2O	13	0.125	52.7847	41.99	3	1	1	4	13	24	0	0	1	0	0	1
ZINC00363840	CCC(CC)C(=O)Nc1ccccc1O	207.126	29	11	2.7669	2	2	49.33	4	1	0	0.785084	2.45	35.1595	6	6	32	20.2025	15	187	814.03	210.883	2	2	5	10	0.5	7	0	4.90689	2.983	68	C12H17NO2	15	0.15625	60.8085	49.33	3	2	1	3	15	32	0	0	1	0	0	0
ZINC00363966	COc1ccccc1OC(=O)C2CCCC2	220.11	153	1	2.7908	3	0	35.53	3	1	0	0.860352	2.56	35.9547	6	6	32	22.2813	17	218	849.03	213.616	1	0	3	10	0.5	5	0	5.08746	2.798	78	C13H16O3	16	0.1875	60.587	35.53	3	0	0	3	16	32	0	0	2	1	1	0
ZINC00364057	CSc1nnc(s1)NC(=O)c2ccco2	240.998	301	5	2.1053	6	1	121.56	3	2	1	0.773146	1.57	29.4516	10	10	22	17.0664	16	223	319.07	174.818	4	1	3	13	0.444444	4	0	5	1.719	74	C8H7N3O2S2	15	0.0454545	58.3512	68.02	5	1	1	7	15	22	0	0	2	0	0	2
ZINC00364126	CCCC(=O)Nc1nnc(s1)SC	217.034	301	5	1.9986	5	1	108.42	4	1	1	0.747858	1.57	29.5567	5	5	24	19.5233	13	173	420.06	177.261	4	1	5	8	0.444444	6	0	4.70044	2.124	58	C7H11N3OS2	13	0.166667	55.2277	54.88	4	1	1	6	13	24	0	0	1	0	0	1
ZINC00364435	Cc1ccc(cc1O)NC(=O)c2ccco2	217.074	45	5	2.54592	3	2	62.47	2	2	0	0.810449	2.34	31.9607	11	11	27	15.5593	17	239	544.04	191.144	2	2	3	15	0.444444	4	0	5.08746	1.513	80	C12H11NO3	16	0.037037	59.505	62.47	4	2	1	4	16	27	0	0	2	0	0	1
ZINC00364992	Cc1ccc(cc1O)NC(=O)c2cccc(c2)F	245.085	25	5	3.09202	2	2	49.33	2	2	0	0.832521	2.56	35.9025	12	12	30	15.9395	19	295	655.04	220.377	2	2	3	16	0.5	5	0	5.24793	2.974	90	C14H12FNO2	18	0.0333333	67.197	49.33	3	2	1	4	18	30	0	0	2	0	0	0
ZINC00368461	c1cc(cc(c1)Cl)NC(=O)C(F)(F)F	223.001	10	9	2.8408	1	1	29.1	1	1	0	0.803069	1.68	23.167	6	6	19	11.113	14	157	179.06	166.323	2	1	4	9	0.428571	6	0	4.80735	2.597	68	C8H5ClF3NO	14	0.0526316	46.1367	29.1	2	1	1	6	14	19	0	0	1	0	0	0
ZINC00369119	c1cc(c(nc1)Cl)C(=O)Nc2nc[nH]n2	223.026	84	2	1.1054	4	2	83.56	2	2	1	0.694688	1.57	26.5628	11	11	21	11.8972	16	201	274.07	163.578	5	2	3	14	0.5	3	0	5	0.848	74	C8H6ClN5O	15	0	53.5829	83.56	6	2	1	7	15	21	0	0	2	0	0	2
ZINC00372245	c1cnccc1CNC(=O)CC#N	175.075	91	2	0.61148	3	1	65.78	3	1	0	0.805453	2.01	25.9431	6	6	22	13.4369	13	180	328.04	166.926	4	1	6	6	0.444444	3	0	4.70044	-0.52	56	C9H9N3O	13	0.0909091	46.3137	65.78	4	1	1	4	13	22	0	0	1	0	0	1
ZINC00381702	c1cc(cnc1)C(=O)OCc2ccc(cc2)Cl	247.04	260	1	3.092	3	0	39.19	3	2	0	0.852061	2.45	34.4319	12	12	27	15.5461	18	305	512.04	212.224	3	0	4	9	0.454545	5	0	5.16993	3.038	82	C13H10ClNO2	17	0.037037	64.8085	39.19	3	0	0	4	17	27	0	0	2	0	0	1
ZINC00382439	CC(C)(C)CC(=O)Nc1ccc(cc1F)F	227.112	12	3	3.3395	1	1	29.1	2	1	0	0.859631	2.34	34.1379	6	6	31	20.4221	16	221	721.04	214.228	2	1	5	9	0.444444	8	0	5	3.534	78	C12H15F2NO	16	0.16129	59.0597	29.1	2	1	1	4	16	31	0	0	1	0	0	0
ZINC00383096	Cc1ccccc1OCC(=O)Nc2ncccn2	243.101	145	5	1.80252	4	1	64.11	4	2	0	0.804446	2.34	36.4523	12	12	31	20.3857	19	328	718.05	219.007	4	1	4	9	0.454545	5	0	5.24793	1.336	86	C13H13N3O2	18	0.0645161	67.3357	64.11	5	1	1	5	18	31	0	0	2	0	0	1
ZINC00383776	Cc1ccc(c(c1)O)NC(=O)c2ccccc2C	241.11	33	4	3.26134	2	2	49.33	2	2	0	0.731467	2.78	39.1059	12	12	33	18.0161	19	291	850.03	231.605	2	2	3	16	0.5	5	0	5.24793	3.89	90	C15H15NO2	18	0.0606061	71.976	49.33	3	2	1	3	18	33	0	0	2	0	0	0
ZINC00384067	c1ccc(cc1)N2[C@H]3CC[C@@H](O2)C=C3	187.1	279	1	2.5254	2	0	12.47	1	1	0	0.826189	2.56	31.6903	6	6	27	16.7877	16	177	659.02	177.38	0	0	0	8	0.428571	1	0	5	2.667	76	C12H13NO	14	0.148148	55.956	12.47	2	0	0	2	14	27	2	0	4	1	3	0
ZINC00385474	CCc1ccccc1NC(=O)c2c(nns2)C	247.078	38	1	2.66122	4	1	83.12	3	2	0	0.782802	2.23	36.7903	11	11	30	19.4297	18	233	689.05	214.066	4	1	3	14	0.5	5	0	5.16993	2.247	84	C12H13N3OS	17	0.1	68.4192	54.88	4	1	1	5	17	30	0	0	2	0	0	1
ZINC00386749	Cc1ccc(cc1)N2CCN(CC2)C(=O)N	219.137	179	5	1.19572	2	1	49.57	1	1	0	0.713514	2.34	36.5575	6	6	33	22.8425	17	253	916.04	211.73	4	1	3	7	0.5	2	0	5.08746	1.342	80	C12H17N3O	16	0.151515	64.5484	49.57	4	2	2	4	16	33	0	0	2	1	1	0
ZINC00386756	c1cc(ccc1N2CCN(CC2)C(=O)N)F	223.112	179	5	1.0264	2	1	49.57	1	1	0	0.363527	2.12	33.3541	6	6	30	20.7659	17	253	721.05	200.502	4	1	3	7	0.5	2	0	5.08746	1.066	80	C11H14FN3O	16	0.133333	59.7694	49.57	4	2	2	5	16	30	0	0	2	1	1	0
[truncated: 6 more columns]
